# Supplementary material for: Organic carbon burial by river meandering partially offsets bank-erosion carbon fluxes in a discontinuous permafrost floodplain
Source: Copernicus journal article supplement (doi:10.5194/esurf-2021-80), 2021-11-03
Supplement: Supplementary file 1 [file esurf-2021-80-supplement.zip]

Archive with 16 entries (16 files):
- Fig1.png
- Fig2.png
- Fig3.pdf
- Fig4.pdf
- Fig5.pdf
- FigS1.png
- FigS2.pdf
- FigS3.pdf
- FigS4.png
- FigS5.pdf
- FigS6.pdf
- FigS7.pdf
- KoyukukBankCarbon_EsurfTemplate_Supplement_final2.pdf
- TableS2.txt
- TableS4.txt
- TableS5.txt
