# Supplementary material for: Organic carbon burial by river meandering partially offsets bank-erosion carbon fluxes in a discontinuous permafrost floodplain
Source: Copernicus journal article supplement (doi:10.5194/esurf-2021-80), 2021-11-03
Supplement: Supplementary file 1 [file esurf-2021-80-supplement.zip › KoyukukBankCarbon_EsurfTemplate_Supplement_final2.pdf]

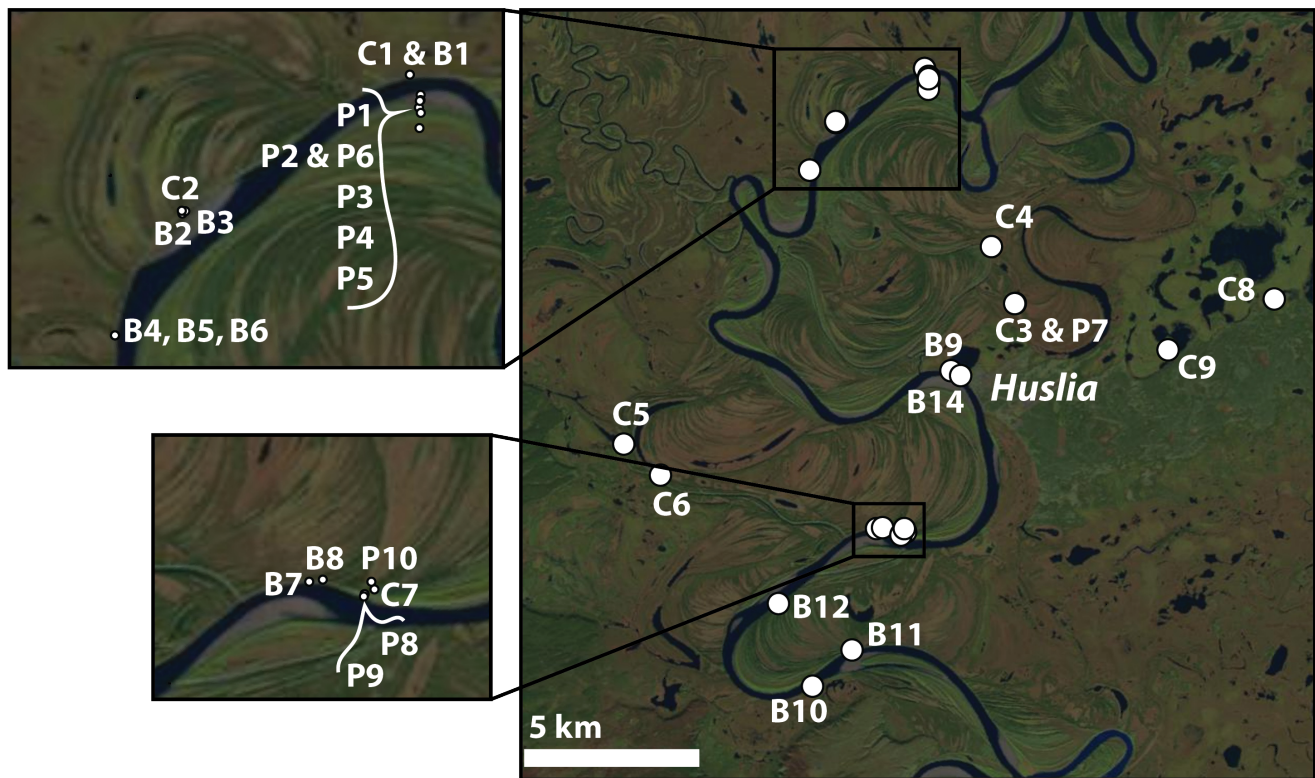

Fig. S1: Sample locations. Georeferenced Landsat imagery with labelled sampling locations; C = core, B = bank, P = pit samples.

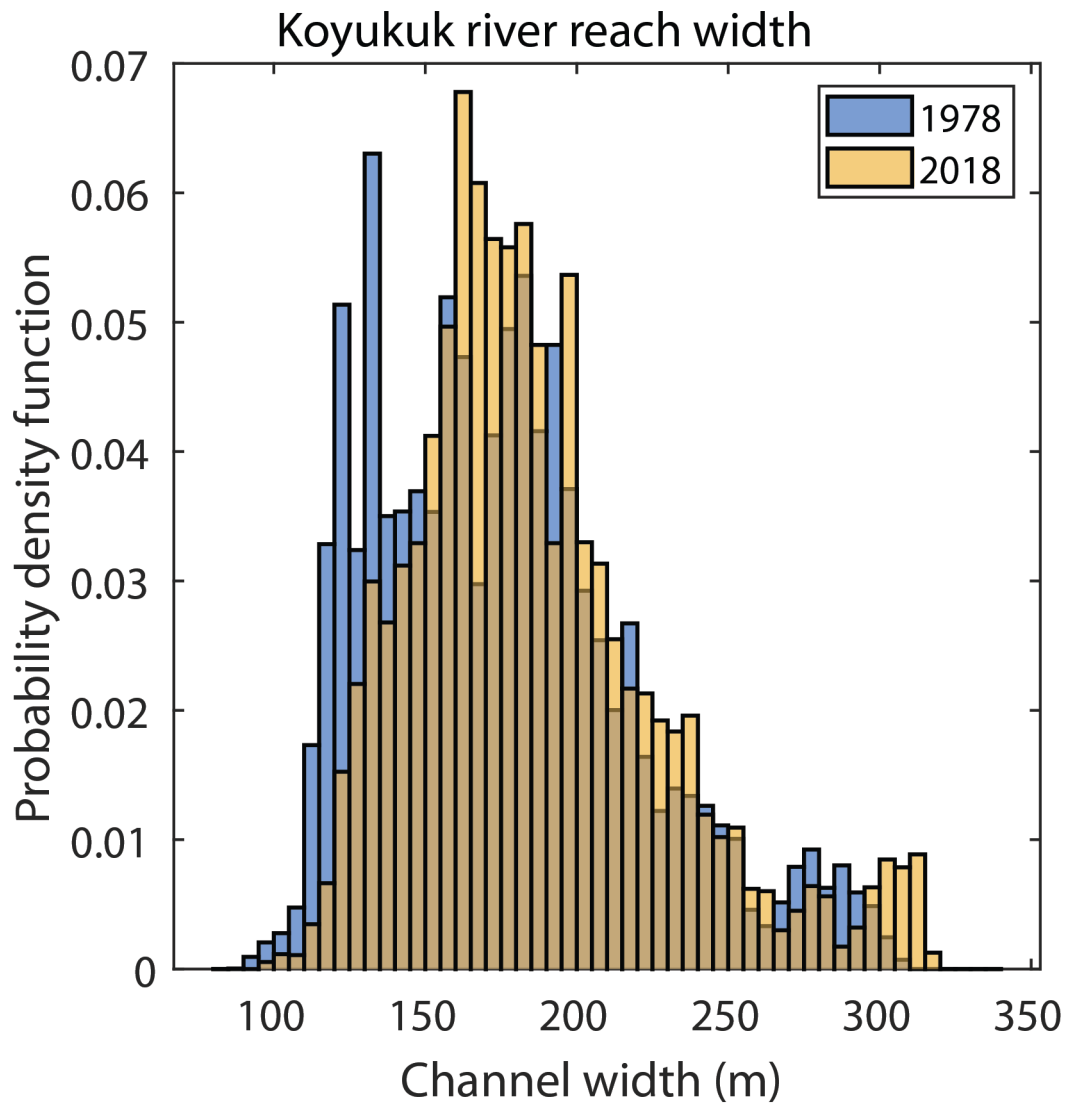

Fig. S2: Koyukuk River width. Probability distribution of width of channel masks generated from Landsat 30 m imagery, with widths calculated at each pixel along the channel centerline for the reach of the Koyukuk River pictured in Fig. S1 (Rowland et al., 2019). The reach maintained a roughly constant channel width over the Landsat record, from  $173 \pm 43$  m (median  $\pm$  1SD) in 1978 to  $179 \pm 42$  m in 2018, supporting our assumption that cutbank erosion and point bar deposition occur at the same rate.

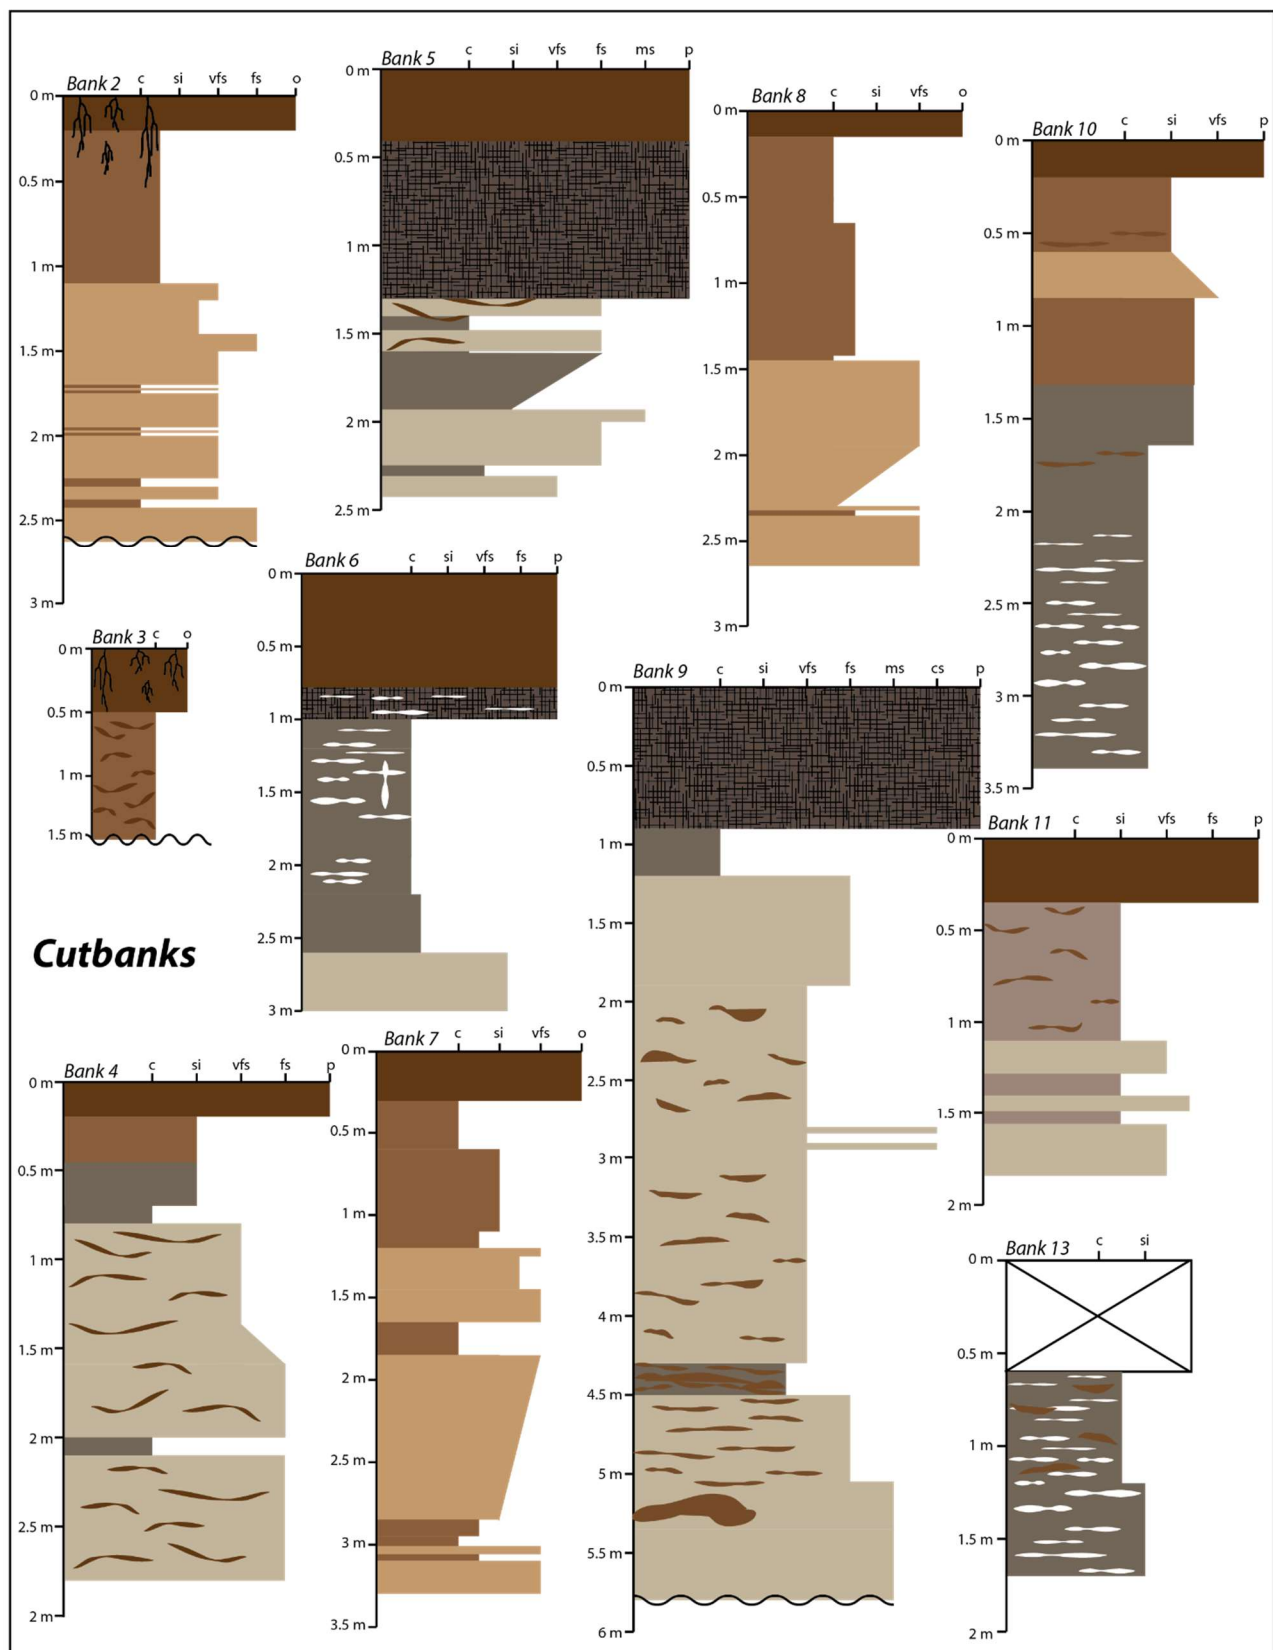

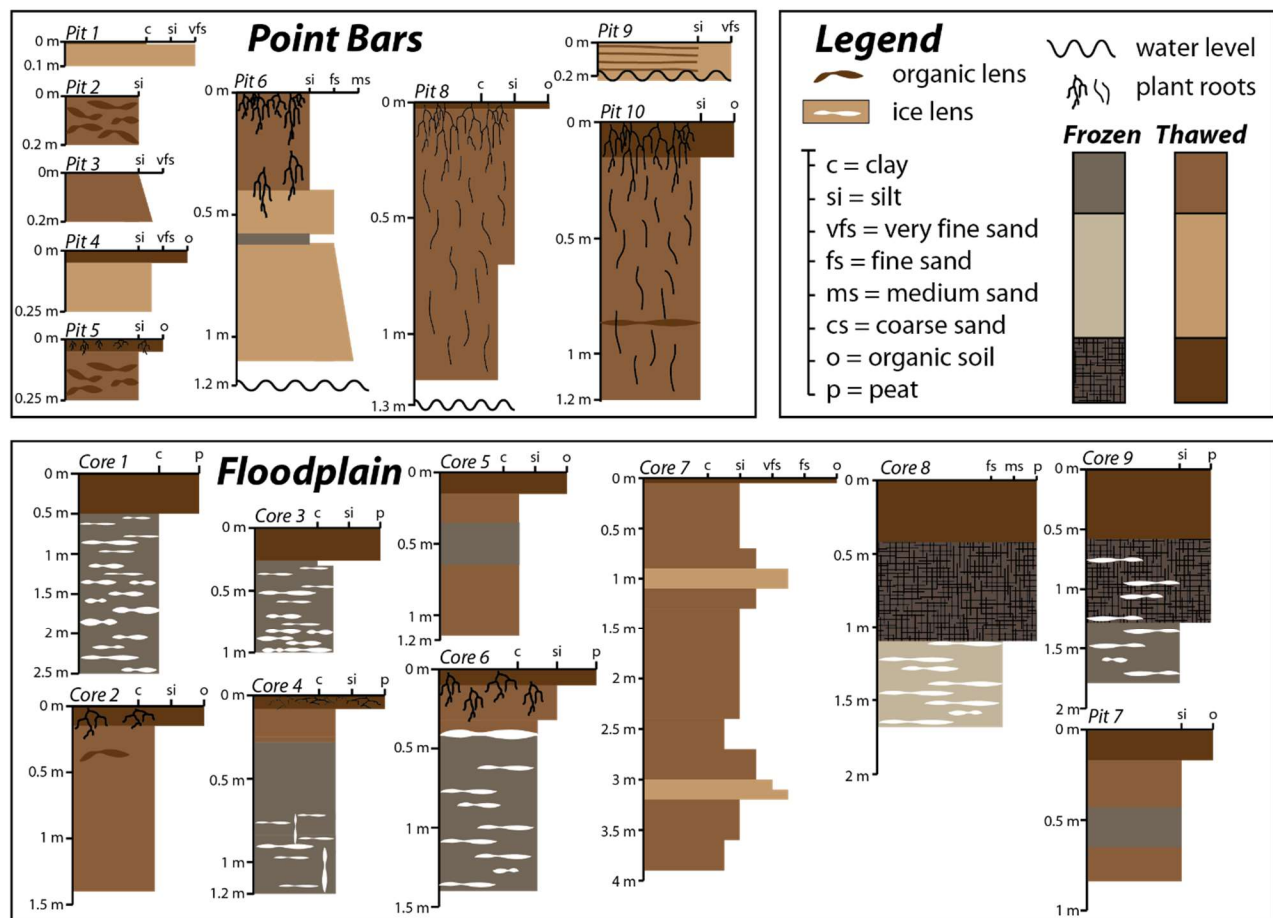

Fig. S3: Measured stratigraphic sections grouped by location on river floodplain. The river channel is eroding its cutbanks and depositing sediment on its point bars, which accrete to form the floodplain as the channel continues to migrate laterally. Note that deposits were generally sandy greater than 2 m depth below the floodplain surface, and that organic horizon thickness at the ground surface varies, though lenses of organic-rich sediment were prevalent meters below the surface. The active layer was shallower in permafrost units containing thick layers of peat, while locations without permafrost contained plant roots extending meters farther below the ground surface and lacked thermoerosional niches. Thicknesses of stratigraphic units were tabulated for each section in Table S4.

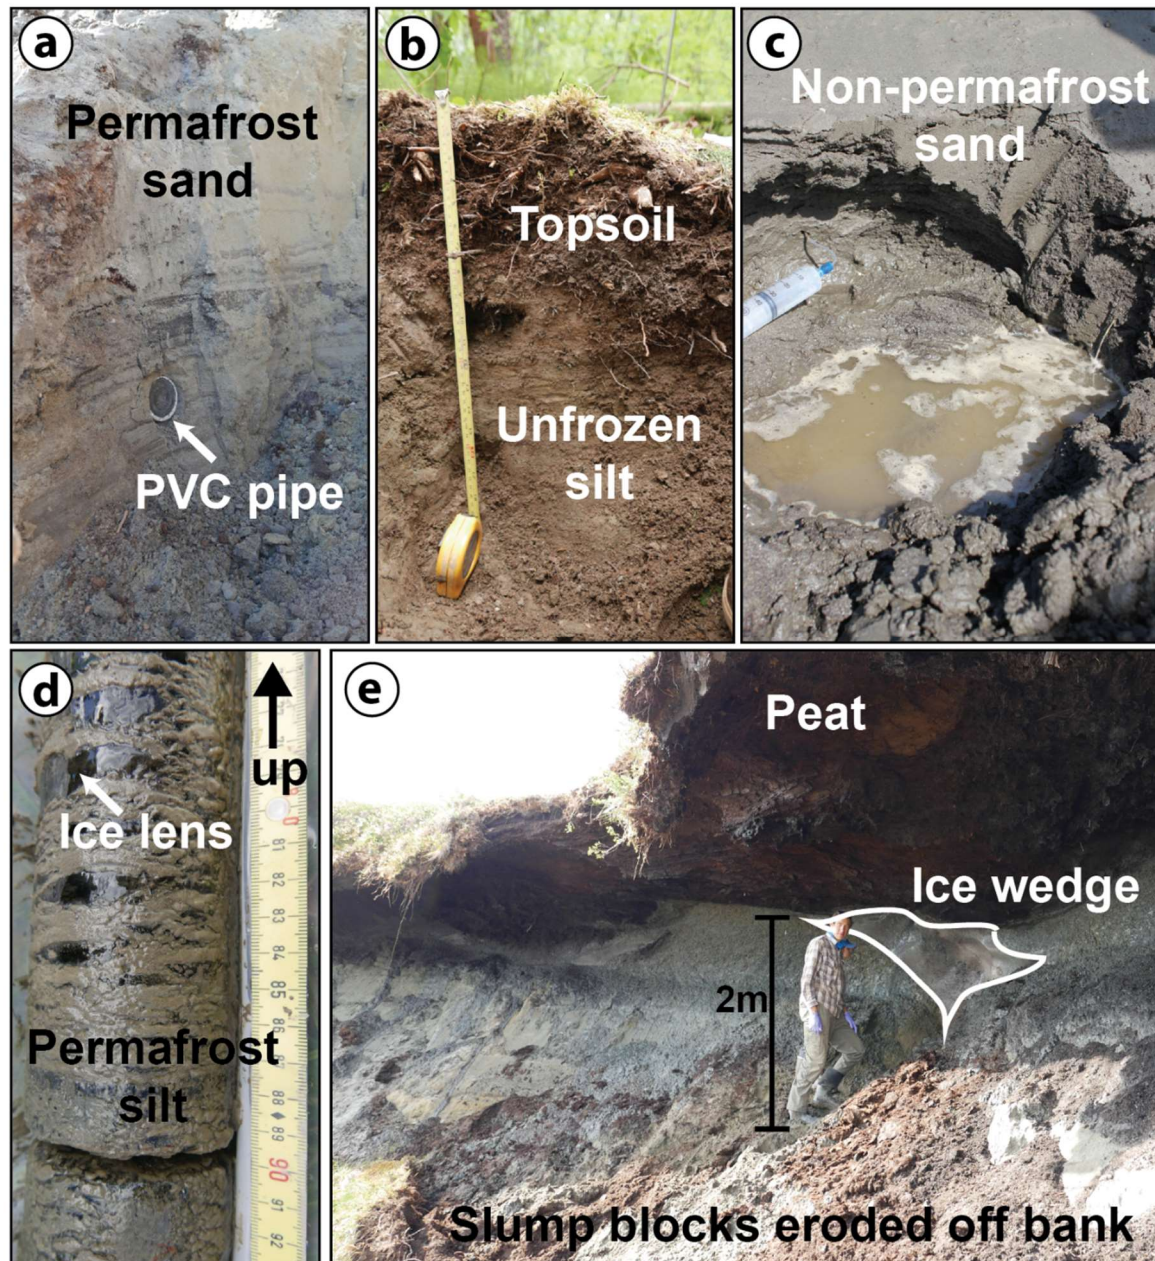

Fig. S4: Field photos of floodplain stratigraphic facies. (a) Permafrost sand in Bank 9 with 2 inch PVC pipe (outer diameter is 6.0 cm) installed in the bank for scale. (b) Pit dug in non-permafrost ground with root-rich topsoil overlying silt at Core 5. (c) Non-permafrost sandy deposits on a point bar beach at Pit 9. (d) Permafrost silt containing ice lenses in Core 4. (e) Overhung cutbank from Bank 9, with a layer of peat overlying an ice wedge surrounded by grey, frozen silt with slump blocks and intraclasts of thawed peat and silt forming a slope that shields the bank.

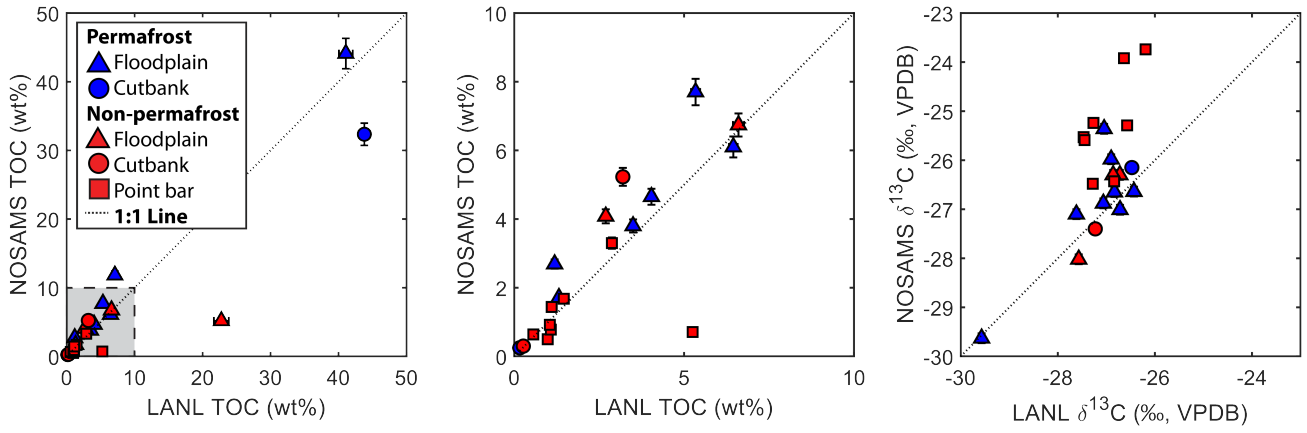

25 **Fig. S5: Organic carbon measurement comparison.** TOC and OC stable isotopes were measured at both NOSAMS and Los Alamos  
 National Lab (LANL), with NOSAMS generally showing a slightly higher TOC and  $\delta^{13}\text{C}$ . We attribute these differences to  
 decarbonation procedures (see Materials and methods). All plots in the main text and supplemental materials use the LANL TOC  
 and  $\delta^{13}\text{C}$  values with NOSAMS radiocarbon measurements. (a) NOSAMS versus LANL TOC measurements, with error bars  
 showing 1SD analytical uncertainty. (b) Zoomed in plot of shaded region in plot (a). (c) NOSAMS versus LANL OC stable isotope  
 30 measurements, reported as per mille (‰) relative to VPDB with error bars showing 1SD analytical uncertainty.

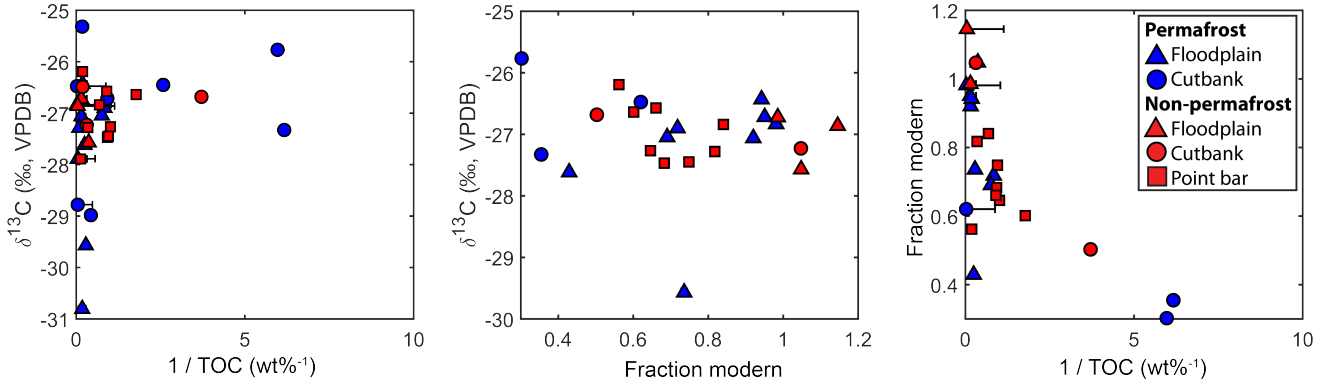

**Fig. S6: Sediment OC characteristics.** Stable organic carbon isotopes displayed no trends with total organic carbon (TOC) or  
 radiocarbon fraction modern (Fm). Sediment  $\delta^{13}\text{C}$  values spanned the range previously reported in peat and woody debris (from -  
 23.2 $\pm$ 0.2 ‰ to -28.6 $\pm$ 0.2 ‰) on the Koyukuk River floodplain near its confluence with the Yukon River (O'Donnell et al., 2012).  
 35 Stable organic carbon isotope values also incorporated a petrogenic end-member, and kerogen-rich sedimentary rocks in the Brooks  
 Range had  $\delta^{13}\text{C}$  ranging from -27.23 $\pm$ 0.1 ‰ to -30.75 $\pm$ 0.1 ‰ (Johnson et al., 2015). Measured  $\delta^{13}\text{C}$  values are reported in units of  
 per mille (‰) relative to the VPDB, with x and y error bars showing 1SD analytical uncertainty.

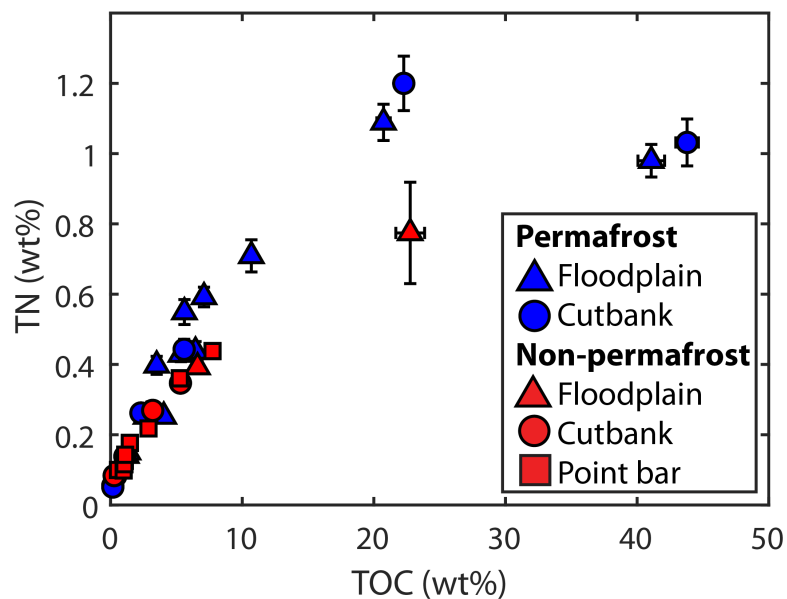

Fig. S7: Sediment total nitrogen. Total nitrogen (TN) versus total organic carbon (TOC) measured as dry weight % of samples, with error bars showing 1SD analytical uncertainty.

Table S1: Sample site locations and characteristics.

| Sample site | Landform   | Latitude (°) | Longitude (°) | Frozen ground type |
|-------------|------------|--------------|---------------|--------------------|
| Bank 1      | Cutbank    | 65.78014     | -156.43661    | Permafrost         |
| Bank 2      | Cutbank    | 65.76493     | -156.49031    | Non-permafrost     |
| Bank 3      | Cutbank    | 65.76519     | -156.48964    | Non-permafrost     |
| Bank 4      | Cutbank    | 65.75232     | -156.50511    | Permafrost         |
| Bank 5      | Cutbank    | 65.75232     | -156.50511    | Permafrost         |
| Bank 6      | Cutbank    | 65.75232     | -156.50511    | Permafrost         |
| Bank 7      | Cutbank    | 65.66093     | -156.45087    | Non-permafrost     |
| Bank 8      | Cutbank    | 65.66126     | -156.44711    | Non-permafrost     |
| Bank 9      | Cutbank    | 65.70265     | -156.40977    | Permafrost         |
| Bank 10     | Cutbank    | 65.61942     | -156.48534    | Permafrost         |
| Bank 11     | Cutbank    | 65.62931     | -156.46198    | Non-permafrost     |
| Bank 12     | Cutbank    | 65.64022     | -156.50949    | Non-permafrost     |
| Bank 13     | Cutbank    | 65.87132     | -156.26283    | Permafrost         |
| Bank 14     | Cutbank    | 65.70153     | -156.40353    | Permafrost         |
| Core 1      | Floodplain | 65.78014     | -156.43661    | Permafrost         |

|        |            |          |            |                |
|--------|------------|----------|------------|----------------|
| Core 2 | Floodplain | 65.76521 | -156.49049 | Non-permafrost |
| Core 3 | Floodplain | 65.72090 | -156.37178 | Permafrost     |
| Core 4 | Floodplain | 65.73519 | -156.38866 | Permafrost     |
| Core 5 | Floodplain | 65.67904 | -156.61163 | Non-permafrost |
| Core 6 | Floodplain | 65.67158 | -156.58762 | Permafrost     |
| Core 7 | Point bar  | 65.66046 | -156.43256 | Non-permafrost |
| Core 8 | Floodplain | 65.72552 | -156.20992 | Permafrost     |
| Core 9 | Floodplain | 65.71100 | -156.27473 | Permafrost     |
| Pit 1  | Point bar  | 65.77817 | -156.43370 | Non-permafrost |
| Pit 2  | Point bar  | 65.77764 | -156.43364 | Non-permafrost |
| Pit 3  | Point bar  | 65.77688 | -156.43394 | Non-permafrost |
| Pit 4  | Point bar  | 65.77636 | -156.43342 | Non-permafrost |
| Pit 5  | Point bar  | 65.77483 | -156.43354 | Non-permafrost |
| Pit 6  | Point bar  | 65.77756 | -156.43381 | Non-permafrost |
| Pit 7  | Floodplain | 65.72083 | -156.37217 | Non-permafrost |
| Pit 8  | Point bar  | 65.65986 | -156.43524 | Non-permafrost |
| Pit 9  | Point bar  | 65.65958 | -156.43542 | Non-permafrost |
| Pit 10 | Point bar  | 65.66132 | -156.43354 | Non-permafrost |

**Table S2: Sample descriptions and results of laboratory analysis. Starred samples have median grain size ( $D_{50}$ ), TOC, TN,  $\delta^{13}C$  and molar TOC/TN ratios previously reported in Douglas et al. (2021).**

45 Attached as file TableS2.txt

**Table S3: Averaged sediment TOC concentrations and constants used in calculations of bank TOC integrated to channel depth.**

|                                                | Sand        | Silt        | Peat        | Topsoil     |
|------------------------------------------------|-------------|-------------|-------------|-------------|
| <b><math>D_{50}</math> (mm)</b>                | >0.063      | <0.063      | N/A         | N/A         |
| <b>Water content (wt%)</b>                     | 18.1±6.1    | 46.6±15.6   | 87.5±7.4    | 62.2±1.0    |
| <b>TOC (wt%)</b>                               | 0.94±0.95   | 3.69±2.25   | 35.20±12.60 | 15.25±10.62 |
| <b>TOC (kgC/m<sup>3</sup>)</b>                 | 7.49±8.27   | 19.1±14.4   | 42.7±20.0   | 55.9±42.2   |
| <b>TOC<sub>petro</sub> (wt%)</b>               | 0.108±0.045 | 0.108±0.045 | 0.108±0.045 | 0.108±0.045 |
| <b>TOC<sub>petro</sub> (kgC/m<sup>3</sup>)</b> | 0.86±0.52   | 0.56±0.34   | 0.13±0.07   | 0.40±0.20   |
| <b>TOC<sub>bio</sub> (wt%)</b>                 | 0.83±0.95   | 3.58±2.25   | 35.09±12.60 | 15.14±10.62 |
| <b>TOC<sub>bio</sub> (kgC/m<sup>3</sup>)</b>   | 6.63±8.13   | 18.57±14.29 | 42.55±20.00 | 55.52±42.18 |

|                                   |         |
|-----------------------------------|---------|
| Bulk density (kg/m <sup>3</sup> ) | 971±283 |
| Channel Depth (m)                 | 12.4    |
| Migration Rate (m/yr)             | 0.52    |

**Table S4: Calculation of bank TOC, biospheric, and petrogenic components integrated to channel depth based on measured stratigraphic columns. Note that unmeasured section was assumed to consist of sand based on field observations.**

50 Attached as file TableS4.txt

**Table S5: Complete grain size distributions measured using laser diffraction tabulated in log-normal bins, with 10<sup>th</sup>-, 50<sup>th</sup>- and 90<sup>th</sup>-percentile grain size reported as D<sub>10</sub>, D<sub>50</sub>, and D<sub>90</sub>.**

Attached as file TableS5.txt

55

**Table S6: Linear mixing calculations of fraction modern of biospheric OC and fraction of biospheric OC produced *in-situ* (as opposed to being deposited in association with the sediment by the river). End-members for transported OC (Fm of oldest woody debris from a cutbank) and *in situ* produced OC (youngest topsoil *Fm<sub>bio</sub>*) are italicized.**

| Sample Name          | Sample Type                | Biospheric fraction modern ( <i>Fm<sub>bio</sub></i> ) | Fraction <i>in-situ</i> biomass ( <i>f<sub>bio, is</sub></i> ) |
|----------------------|----------------------------|--------------------------------------------------------|----------------------------------------------------------------|
| KY18-Bank2-10        | Cutbank sediment           | 1.0837±0.0330                                          | 0.9272±0.0825                                                  |
| KY18-Bank2-230       | Cutbank sediment           | 0.8398±0.1015                                          | 0.6617±0.0906                                                  |
| KY18-Bank9-Peat      | Cutbank sediment           | 0.6217±0.0173                                          | 0.4243±0.0355                                                  |
| KY18-Bank9-220       | Cutbank sediment           | 1.0631±0.1776                                          | 0.9047±0.1890                                                  |
| KY18-Bank9-350       | Cutbank sediment           | 0.8509±0.1396                                          | 0.6737±0.1158                                                  |
| KY18-Core1-22-28     | Floodplain sediment        | 0.9359±0.0265                                          | 0.7662±0.0662                                                  |
| KY18-Core1-105-111   | Floodplain sediment        | 0.7593±0.0228                                          | 0.5740±0.0489                                                  |
| KY18-Core2-10-12     | Floodplain sediment        | 1.0916±0.0413                                          | 0.9357±0.0870                                                  |
| KY18-Core2-35-37     | Floodplain sediment        | 1.0018±0.0354                                          | 0.8380±0.0755                                                  |
| KY18-Core3-15-20     | Floodplain sediment        | 0.9653±0.0340                                          | 0.7983±0.0714                                                  |
| KY18-Core3-84-89     | Floodplain sediment        | 0.7899±0.0380                                          | 0.6074±0.0554                                                  |
| KY18-Core4-16-20     | Floodplain sediment        | 0.9616±0.0342                                          | 0.7942±0.0711                                                  |
| KY18-Core4-105-110   | Floodplain sediment        | 0.7521±0.0347                                          | 0.5662±0.0508                                                  |
| <i>KY18-Core5-15</i> | <i>Floodplain sediment</i> | <i>1.1507±0.0781</i>                                   |                                                                |
| KY18-Core7-85-95     | Point bar sediment         | 0.7440±0.0551                                          | 0.5574±0.0563                                                  |
| KY18-Core7-390-400   | Point bar sediment         | 0.5736±0.0205                                          | 0.3719±0.0314                                                  |
| KY18-Core9-33-38     | Floodplain sediment        | 0.9837±0.0344                                          | 0.8183±0.0733                                                  |

|                    |                             |                       |               |
|--------------------|-----------------------------|-----------------------|---------------|
| KY18-Core9-169-174 | Floodplain sediment         | 0.4409±0.0160         | 0.2275±0.0190 |
| KY18-Pit1-5        | Point bar sediment          | 0.7253±0.0383         | 0.5371±0.0491 |
| KY18-Pit2-10       | Point bar sediment          | 0.8494±0.0319         | 0.6721±0.0595 |
| KY18-Pit4-20       | Point bar sediment          | 0.7588±0.0382         | 0.5735±0.0524 |
| KY18-Pit5-20       | Point bar sediment          | 0.9077±0.0401         | 0.7356±0.0679 |
| KY18-Pit6-60       | Point bar sediment          | 0.8343±0.0426         | 0.6556±0.0614 |
| KY18-Pit8-40       | Point bar sediment          | 0.7323±0.0365         | 0.5446±0.0493 |
| <i>KY18-Bank14</i> | <i>Cutbank woody debris</i> | <i>0.2319±0.00152</i> |               |
