# Supplementary material for: Organic carbon burial by river meandering partially offsets bank-erosion carbon fluxes in a discontinuous permafrost floodplain
Source: Copernicus journal article supplement (doi:10.5194/esurf-2021-80), 2021-11-03
Supplement: Supplementary file [file esurf-2021-80-AC1-supplement.pdf]

# Organic carbon burial by river meandering partially offsets bank-erosion carbon fluxes in a discontinuous permafrost floodplain

Madison M. Douglas<sup>1</sup>, Gen K. Li<sup>1</sup>, Woodward W. Fischer<sup>1</sup>, Joel C. Rowland<sup>2</sup>, Preston C. Kemeny<sup>1</sup>, A. Joshua West<sup>3</sup>, Jon Schwenk<sup>2</sup>, Anastasia P. Piliouras<sup>2</sup>, Austin J. Chadwick<sup>1</sup>, Michael P. Lamb<sup>1</sup>

<sup>1</sup>Division of Geological and Planetary Science, California Institute of Technology, Pasadena, CA, 91125, USA

<sup>2</sup>Earth and Environmental Sciences Division, Los Alamos National Laboratory, Los Alamos, NM, 87545, USA

<sup>3</sup>Department of Earth Sciences, University of Southern California, Los Angeles, CA, 90089, USA

Correspondence to: Madison M. Douglas (mmdougl@caltech.edu)

**Abstract.** Arctic river systems erode permafrost in their banks and mobilize particulate organic carbon (OC). Meandering rivers can entrain particulate OC from permafrost many meters below the depth of annual thaw, potentially enabling ~~OC oxidation and~~ the production of greenhouse gases. However, the amount and fate of permafrost OC that is mobilized by river erosion is uncertain. To constrain OC fluxes due to riverbank erosion and deposition, we collected riverbank and floodplain sediment samples along the Koyukuk River, which meanders through discontinuous permafrost in ~~central~~ the Yukon River watershed, Alaska, USA, with an average migration rate of 0.52 m yr<sup>-1</sup>. We measured sediment total OC (TOC<sub>org</sub>) ~~content,~~ radiocarbon ~~content~~ activity, water content, bulk density, grain size, and floodplain stratigraphy. Radiocarbon ~~abundance~~ activity and TOC content were higher in samples dominated by silt as compared to sand, which we used to map OC content onto floodplain stratigraphy and estimate carbon fluxes due to river meandering. ~~Results showed that~~ Results showed that the Koyukuk River erodes and re-deposits a substantial flux of OC each year due to its depth and high migration rate, generating a combined OC flux of a similar magnitude to the floodplain net ecological productivity. However, sediment being eroded from cutbanks and deposited as point bars had similar OC stocks (mean±1SD of 125.3±13.1 kgOC m<sup>-2</sup> in cutbanks versus 114.0±15.7 kgOC m<sup>-2</sup> in point bars) whether or not the banks contained permafrost. We also observed radiocarbon-depleted biospheric OC in both cutbanks and permafrost-free point bars. These results indicate that a ~~significant~~ substantial fraction of aged biospheric OC that is liberated from floodplains by bank erosion is subsequently re-deposited in point bars, rather than being oxidized. The process of aging, erosion, and re-deposition of floodplain organic material may be intrinsic to river-floodplain dynamics, regardless of permafrost content.

## 1 Introduction

The warming climate is changing Arctic landscapes, inducing complex feedbacks in the global carbon cycle as permafrost soils thaw (Scheur et al., 2015; Turetsky et al., 2020). ~~Changes in air temperature and precipitation have increased the thickness of the active layer (ground overlying permafrost that experiences seasonal freeze-thaw cycles), allowing respiration of soil organic carbon (OC) previously frozen for thousands of years (Romanovsky et al., 2010; Isaksen et al., 2016; Biskaborn et al.,~~

2019). Organic carbon is also lost from permafrost through erosion by Arctic rivers—the six largest Arctic rivers contribute ~3 Tg of river particulate OC (POC) to the Arctic Ocean annually (McClelland et al., 2016). Since a substantial portion of eroded POC is thought to be prone to oxidation (Schreiner et al., 2014), river erosion of POC could play an important role in the greenhouse gas fluxes associated with permafrost thaw (Toohey et al., 2016; Walvoord and Kurylyk, 2016)(Schuur et al., 2015; Turetsky et al., 2020). Changes in air temperature and precipitation have increased the thickness of the active layer (ground overlying permafrost that experiences seasonal freeze-thaw cycles), allowing respiration of soil organic carbon (OC) previously frozen for thousands of years (Romanovsky et al., 2010; Isaksen et al., 2016; Biskaborn et al., 2019). Organic carbon is also lost from permafrost through lateral erosion by Arctic rivers—the six largest Arctic rivers contribute ~3 Tg of river particulate OC (POC) to the Arctic Ocean annually (McClelland et al., 2016). Since a substantial portion of eroded POC is thought to be prone to oxidation (Schreiner et al., 2014), river erosion of POC could play an important role in the greenhouse gas fluxes associated with permafrost thaw (Toohey et al., 2016; Walvoord and Kurylyk, 2016).

As Arctic rivers migrate laterally across permafrost floodplains containing high concentrations of soil OC, they mine sediment and organics from tens of meters below the active layer (Spencer et al., 2015; Kanevskiy et al., 2016). Permafrost banks are thus an important source of POC to rivers (Kanevskiy et al., 2016; Loiko et al., 2017; Lininger et al., 2018; Lininger and Wohl, 2019). After mobilization by a river, POC can be oxidized during transport (Striegl et al., 2012; Denfeld et al., 2013; Serikova et al., 2018) or re-buried in floodplains (Wang et al., 2019; Torres et al., 2020). Alternatively, POC can be delivered downstream to the ocean, where it may be oxidized to CO<sub>2</sub> or CH<sub>4</sub> or buried in deltaic sedimentary deposits (Torres et al., 2020; Hilton et al., 2015). Riverbank erosion may be limited by the rate of permafrost thaw (Costard et al., 2003; Randriamazaoro et al., 2007; Dupeyrat et al., 2011), implying that erosion rates could increase with warming air and river water temperatures. Therefore, more rapid riverbank erosion has the potential to generate a significant climatic feedback by making POC previously frozen in permafrost available for oxidation (Striegl et al., 2012; Denfeld et al., 2013; Serikova et al., 2018), but the magnitude of this feedback is highly uncertain.

As Arctic rivers migrate laterally across permafrost floodplains, they can mine sediment and organics from over 10 meters below the active layer (Spencer et al., 2015; Kanevskiy et al., 2016). Permafrost floodplains are thus an important source of POC to rivers (Kanevskiy et al., 2016; Loiko et al., 2017; Lininger et al., 2018; Lininger and Wohl, 2019). After mobilization by a river, POC can be oxidized during transport (Striegl et al., 2012; Denfeld et al., 2013; Serikova et al., 2018) or re-buried in floodplains (Wang et al., 2019; Torres et al., 2020). Alternatively, POC can be delivered downstream to the ocean, where it may be oxidized to CO<sub>2</sub>, reduced to CH<sub>4</sub>, or buried in deltaic sedimentary deposits (Torres et al., 2020; Hilton et al., 2015). Riverbank erosion may be limited by the rate of permafrost thaw (Costard et al., 2003; Randriamazaoro et al., 2007; Dupeyrat et al., 2011), implying that erosion rates could increase with warming air and river water temperatures. Therefore, more rapid riverbank erosion resulting from warming temperatures has the potential to increase fluvial POC fluxes and oxidation, resulting

65 in a positive feedback on the concentration of atmospheric carbon dioxide (Striegl et al., 2012; Denfeld et al., 2013; Serikova et al., 2018). The magnitude and timescale of this feedback are highly uncertain but may be important to consider for predicting and mitigating impacts from anthropogenic climate change.

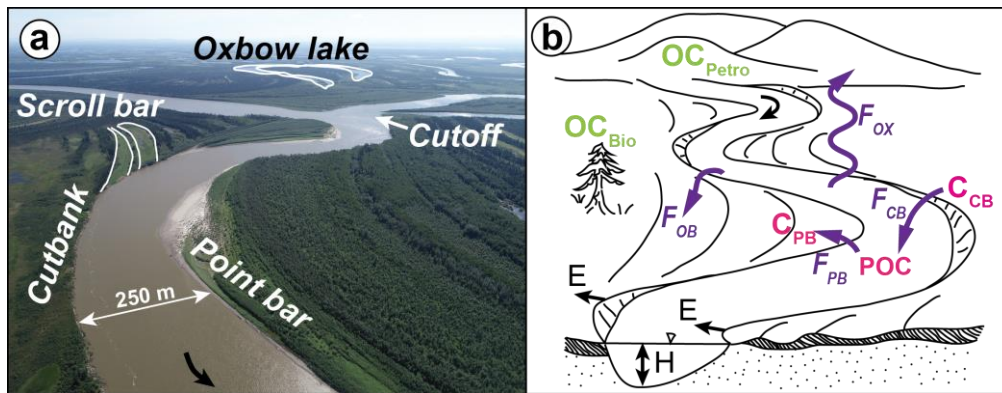

70 Figure 1: Overview of sediment erosion and deposition patterns in meandering river floodplains and important variables influencing the regional carbon cycle. (a) Drone photograph taken overlooking east across the Koyukuk River floodplain, Alaska (location marked with a white star on Fig. 2). The river flows south toward the bottom of the image (indicated by black arrow), eroding the cutbank on the outside of the river bend and depositing sediment on the point bar. Channel migration generates bands of higher and lower elevation sections of floodplain called scroll bars. As the river migrates, an individual bend becomes more sinuous, eventually cutting itself off and abandoning a section of channel, which becomes an oxbow lake. (b) Schematic of a meandering river floodplain, with channel geometry variables shown in black and particulate organic carbon reservoirs and fluxes into and out of the river control volume shown in purple. The river has bankfull depth  $H$  and migrates laterally at rate  $E$ , maintaining a constant channel width. Organic carbon is stored in the river cutbanks ( $C_{CB}$ ) and point bars ( $C_{PB}$ ) and is transported in the river as particulates (POC). These reservoirs are mixtures of radiocarbon-dead ( $F_m = 0$ ) petrogenic organic carbon ( $OC_{Petro}$ ) and biospheric organic carbon ( $OC_{Bio}$ ) that has been stored in permafrost (low  $F_m$ ) or been recently fixed by the biosphere ( $F_m \geq 1$ ). Fluxes of organic carbon into and out of the river control volume include cutbank erosion ( $F_{CB}$ ), point bar deposition ( $F_{PB}$ ), overbank deposition ( $F_{OB}$ ), and oxidation of POC and DOC ( $F_{OX}$ ).

Recent work has studied floodplain POC stocks vulnerable to erosion by Arctic rivers (Vonk et al., 2019; Parmentier et al., 2017). For instance, Lininger et al. conducted an extensive field campaign to map OC concentrations and stocks across the Yukon Flats, and found statistically significant variability in OC concentrations between geomorphic landforms produced by river processes (Lininger et al., 2018) as well as systematic underestimation of floodplain OC stocks in large data compilations (Lininger et al., 2019). Their work built on previous studies that characterized vegetation and permafrost succession through a time series of floodplain surfaces that had been progressively abandoned by river migration (Shur and Jorgenson, 2007). Yet major questions remain about the magnitude of POC fluxes due to bank erosion and bar deposition in permafrost river systems, as well as the physical processes that govern these fluxes (Lininger and Wohl, 2019). Alluvial rivers commonly maintain an approximately constant channel width, eroding one bank while depositing sediment at a commensurate rate on the opposite bank (Fig. 1a) (Dietrich et al., 1979; Eke et al., 2014). Previous work on meandering rivers demonstrates that rapidly eroding

95 permafrost bluffs may contribute significantly to downstream POC fluxes (Kanevskiy et al., 2016). However, it is unclear to what extent the OC released by bank erosion is compensated by OC burial in depositional bars, as opposed to being transported downstream or oxidized during transport within river systems (Fig. 1b) (Wang et al., 2019; Scheingross et al., 2021).

100 Floodplain POC stocks are vulnerable to erosion by Arctic rivers (Vonk et al., 2019; Parmentier et al., 2017). For instance, Lininger et al. (2018, 2019) mapped OC contents and stocks across the Yukon Flats, and found significant variability in OC contents between riverine landforms (Lininger et al., 2018), as well as underestimation of floodplain OC stocks in previous data compilations (Lininger et al., 2019). Their work built on previous studies that characterized vegetation and permafrost succession through a time series of floodplain surfaces that had been progressively abandoned by river migration (Shur and Jorgenson, 2007). Yet major questions remain about the magnitude of POC fluxes due to bank erosion and bar deposition in permafrost river systems, as well as the physical processes that govern these fluxes (Lininger and Wohl, 2019).

105 Alluvial rivers commonly maintain an approximately constant channel width, eroding one bank while depositing sediment at a commensurate rate on the opposite bank (Fig. 1a) (Dietrich et al., 1979; Eke et al., 2014). Riverbank erosion has been shown to contribute substantially to downstream POC fluxes (Kanevskiy et al., 2016). However, it is unclear to what extent the OC released by bank erosion is compensated by OC burial in depositional bars, as opposed to being transported downstream or oxidized during transport within river systems (Fig. 1b) (Wang et al., 2019; Scheingross et al., 2021).

110 To quantify POC storage and mobilization in Arctic floodplains, we investigated the Koyukuk River in the Yukon River watershed, Alaska, USA (Fig. 2), which is an actively meandering river in discontinuous permafrost. We quantified OC stocks using measurements of OC content in field observations of permafrost occurrence samples, and extrapolated these across the floodplain using floodplain stratigraphy to extrapolate laboratory measurements of sediment and correlations between grain size and total OC content. We then used a one-dimensional mass-balance model to quantify net fluxes of OC into and out of the river due to bank erosion and bar deposition. To attribute OC to biospheric versus rock-derived (petrogenic) sources, we used radiocarbon measurements to infer the abundance and presence of a petrogenic OC end-member and calculate compared the radiocarbon fraction modern range of biospheric carbon radiocarbon compositions in permafrost and non-permafrost sediment samples and landforms.

## 120 2 Measurements and approach

125 To understand cycling of POC between rivers and floodplains, we developed an approach to ascertain OC sources and determine if OC eroded from river deposits is transported downstream or reburied (Fig. 1b). Eroding banks can source OC from modern vegetation and organic horizons near the bank surface as well as deeper sediment that may be depleted in radiocarbon. Radiocarbon provides an effective tracer of OC aging in floodplains (Galy and Eglinton, 2011; Torres et al., 2017), but several processes can produce depleted radiocarbon signals. First, Arctic permafrost deposits are mostly relict, with

low fractions of modern radiocarbon ( $F_m = \frac{[^{14}\text{C}/^{12}\text{C}]_{\text{sample}}}{[^{14}\text{C}/^{12}\text{C}]_{\text{modern}}}$ ) (O'Donnell et al., 2012). If mobilized permafrost POC is re-buried in bars without the addition of newly fixed biospheric OC, then bar sediment should also have OC with low  $F_m$  inherited from permafrost carbon. Second, sediment can contain a radiocarbon-dead, petrogenic OC component that contributes to low  $F_m$  values (Blair et al., 2003). We expected a petrogenic OC contribution in floodplain sediments throughout the Koyukuk River system, since the headwaters of the Koyukuk River contain outcrops of shale bedrock rich in kerogen that source oil to the Prudhoe Bay oilfields (Dumoulin et al., 2004; Wilson et al., 2015; Slack et al., 2015). Third, river-floodplain interactions generate low  $F_m$  carbon via transient OC storage, independent of the presence of either permafrost or petrogenic OC (Torres et al., 2020). For example, floodplain deposits can remain in place over millennial timescales before being reworked by the river channel due to the stochastic nature of river lateral migration (Torres et al., 2017; Repasch et al., 2020). Therefore, radiocarbon measurements provide insight into OC sources, but require de-convolving petrogenic OC from biospheric OC, and assessing aging of OC by storage in permafrost versus non-permafrost floodplain deposits.

## 2 Approach

To understand cycling of POC between rivers and floodplains, we developed an approach to ascertain OC sources and determined if OC eroded from river deposits was transported downstream or reburied (Fig. 1b). Eroding banks can source OC from modern vegetation and organic horizons near the bank surface as well as deeper sediment that may be depleted in radiocarbon. Radiocarbon provides an effective tracer of OC aging in floodplains (Galy and Eglinton, 2011; Torres et al., 2017), but several processes can produce depleted radiocarbon signals. First, many Arctic permafrost deposits are relict from colder climatic conditions (O'Donnell et al., 2012). These deposits have low radiocarbon activity, expressed as fraction modern ( $F_m = A_{\text{sample, norm}} / (0.95 A_{\text{Ox, norm}})$ ;  $A_{\text{sample, norm}}$  indicates sample  $^{14}\text{C}$  activity normalized for isotope fractionation to  $\delta^{13}\text{C}_{\text{VPDB}} = -25\text{‰}$  while  $A_{\text{Ox, norm}}$  indicates NBS Oxalic Acid I normalized to  $\delta^{13}\text{C}_{\text{VPDB}} = -19\text{‰}$ ; with  $\delta^{13}\text{C}_{\text{VPDB}} = (R_{\text{sample}}/R_{\text{VPDB}} - 1) \times 1000$  reported in per mille (‰)) (Reimer et al., 2004). If mobilized permafrost POC is re-buried in bars without the addition of newly fixed biospheric OC, then bar sediment should also have OC with low  $F_m$  values inherited from permafrost carbon. Second, sediment can contain a radiocarbon-dead, petrogenic OC component that contributes to low  $F_m$  values (Blair et al., 2003). We expected a petrogenic OC contribution in floodplain sediments throughout the Koyukuk River system, since the headwaters of the Koyukuk River contain outcrops of shale bedrock rich in kerogen (Dumoulin et al., 2004; Wilson et al., 2015; Slack et al., 2015). Third, river-floodplain interactions generate organic carbon with low  $F_m$  values via transient OC storage, independent of the presence of either permafrost or petrogenic OC (Torres et al., 2020). For example, floodplain deposits can remain in place over millennial timescales before being reworked by the river channel due to the stochastic nature of river lateral migration (Torres et al., 2017; Repasch et al., 2020). Therefore, radiocarbon measurements provide insight into OC sources, but require de-convolving petrogenic OC from biospheric OC, and assessing aging of OC by storage in permafrost versus non-permafrost floodplain deposits.

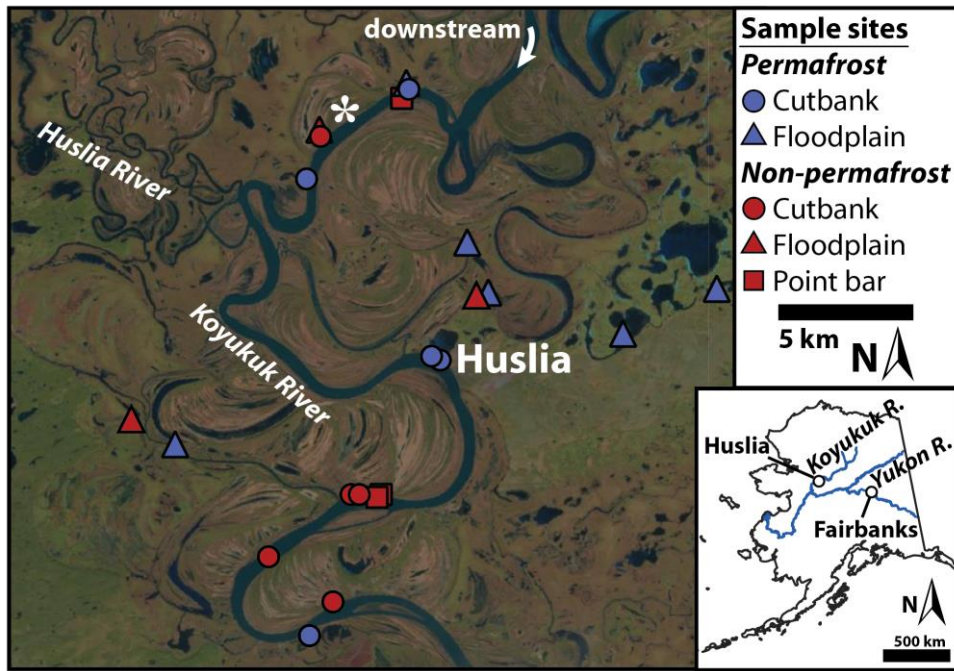

Figure 2: Sample locations on the Koyukuk River floodplain. Locations are coded for sites where we sampled ice-cemented permafrost versus ice-poor ground inferred to be non-permafrost. Sample sites are located near the village of Huslia, in central Alaska, and the river flows towards the south past town. Sampling locations are mapped on Landsat imagery, with the white star marking the location of Fig. 1a (drone photo taken looking east). The inset map was generated using the “Alaska Coast Simplified” and “Major Rivers” shapefiles from the Alaska State Geo-Spatial Data Clearinghouse.

We used sediment TOC and Fm measurements to calculate the Fm of biospheric and contribution from petrogenic OC end-members (Sect. 2). This calculation allowed us to determine if low Fm values were due to a high concentration of radiocarbon-dead rock-derived OC, or preservation and aging of OC in permafrost or in the river floodplain (Fig. 1b) (Scheingross et al., 2021). Both radiocarbon-dead OC derived from bedrock erosion ( $TOC_{petro}$ ) and aging of biosphere-derived OC ( $TOC_{bio}$ ) in permafrost and river floodplain deposits will yield sediment OC with low Fm (Fig. 1b). We partitioned the TOC measured in each sample ( $TOC_{meas}$ ) into a two end-member mixture of biospheric ( $f_{bio}$ ) and petrogenic OC ( $f_{petro}$ ) fractions, with a constant mass fraction of petrogenic OC (Fig. 4d) (Blair et al., 2003; Cui et al., 2016):

$$1 = f_{bio} + f_{petro} \quad (1)$$

175 We used sediment TOC and Fm measurements to calculate the Fm of the biospheric OC end-member as well as the contribution  
of petrogenic OC to our samples. This calculation allowed us to determine if low Fm values were due to a high content of  
radiocarbon-dead rock-derived OC, or preservation and aging of OC in permafrost or in the river floodplain (Fig. 1b)  
(Scheingross et al., 2021). Both radiocarbon-dead OC derived from bedrock erosion ( $TOC_{petro}$ ) and aging of biospheric OC  
( $TOC_{bio}$ ) in permafrost and river floodplain deposits will yield sediment OC with low Fm values (Fig. 1b). We partitioned the  
180 TOC contents measured in each sample ( $TOC_{meas}$ ) into a two end-member mixture of biospheric ( $TOC_{bio} = f_{bio} \times TOC_{meas}$ ) and  
petrogenic OC ( $TOC_{petro} = f_{petro} \times TOC_{meas}$ ) fractions (Fig. 4c) (Blair et al., 2003; Cui et al., 2016):

$$TOC_{bio} + TOC_{petro} = TOC_{meas} = f_{bio} TOC_{meas} + f_{petro} TOC_{meas} \quad (1)$$

185 Changes in the ratio of biospheric to petrogenic OC, as well as aging of the biospheric pool, will change the measured fraction  
modern in sediment OC ( $Fm_{meas}$ ; unitless ratio) (Galy et al., 2008). By mass balance,

$$Fm_{meas} f_{bio} + f_{petro} = \frac{TOC_{bio}}{TOC_{meas}} + \frac{TOC_{petro}}{TOC_{meas}} = 1 \quad (2)$$

Changes in the ratio of biospheric to petrogenic OC, as well as aging of the biospheric pool, will change the measured fraction  
modern in sediment OC ( $Fm_{meas}$ ; unitless ratio) (Galy et al., 2008). By mass balance,

$$TOC_{meas} Fm_{meas} = f_{bio} TOC_{bio} Fm_{bio} + f_{petro} TOC_{petro} Fm_{petro} \quad (3)$$

The petrogenic OC end-member was assumed to be radiocarbon-dead ( $Fm_{petro} = 0$ ), and Eqs. (1) and (2) substituted into Eq.  
(3) yields:

$$Fm_{meas} = \frac{Fm_{bio}(TOC_{meas} - f_{petro} TOC_{meas})}{TOC_{meas}} \quad (4)$$

195 A regression of Eq. (4) for  $Fm_{meas}$  versus  $TOC_{meas}$  was used to calculate the  $Fm_{bio}$  (effectively the mean age of biosphere-  
derived carbon) and the mass fraction  $f_{petro}$  (Hemingway et al., 2018; Wang et al., 2019). We assumed that petrogenic OC  
concentration in floodplain sediment is constant along our study reach ( $TOC_{petro} = f_{petro} \times TOC_{meas}$  is constant for all  
stratigraphic units). While recent work found evidence for petrogenic OC oxidation during riverine transport of sediment  
200 (Bouchez et al., 2010; Horan et al., 2019), these studies focused on river reaches spanning hundreds of kilometres, an order of  
magnitude longer than our study reach. Even over hundreds of kilometers, Horan et al. (2019) found that less than half of  
petrogenic OC eroded from the Mackenzie River catchment was oxidized during transport. Therefore, it is reasonable to  
assume that the production and oxidation of significant rock-derived OC is minor within our study reach.

205 To separate biospheric OC that was produced *in situ* versus eroded from a cutbank, transported as POC and re-deposited by the river, we use a linear mixing model following Scheingross et al. (2021):

$$f_{bio,ts} = \frac{Fm_{bio} - Fm_{bio,cb}}{Fm_{bio,ts} - Fm_{bio,cb}} \quad (5)$$

Where  $f_{bio,ts}$  is the fraction of biospheric OC produced *in situ*,  $Fm_{bio}$  is the fraction modern of biospheric OC for each sediment sample,  $Fm_{bio,cb}$  is the cutbank OC end-member, and  $Fm_{bio,ts}$  is the *in situ* biospheric OC endmember (Supplemental Table S6).

210 We select a modern topsoil with the highest measured  $Fm_{bio}$  as the *in situ* OC endmember ( $Fm_{bio,ts}$ ; KY18 Core5-15), and the oldest woody debris from a cutbank as the cutbank endmember ( $Fm_{bio,cb}$ ; KY18 Bank14).

A non-linear optimization of Eq. (4) for  $Fm_{meas}$  versus  $TOC_{meas}$  was used to calculate 95% confidence intervals around  $Fm_{bio}$  (effectively the mean radiocarbon activity of biosphere-derived carbon) and the  $TOC_{petro}$  content in cutbank and point bar sediment samples (Fig. 4c) (Hemingway et al., 2018; Wang et al., 2019). We reported a range of fitted  $Fm_{bio}$  end-members to 215 compare biospheric OC eroding from cutbanks to that being deposited in point bars because cutbanks comprise a mixture of permafrost and non-permafrost terrain with varying Fm values that are homogenized during transport in the river. This optimization also considers a range of  $TOC_{petro}$  content end-members for cutbanks and point bars. We do not expect that geographic location on the Koyukuk floodplain has a strong control on sediment  $OC_{petro}$  content. While recent work found evidence for petrogenic OC oxidation during riverine transport of sediment (Bouchez et al., 2010; Horan et al., 2019), these 220 studies focused on river reaches spanning hundreds of kilometres, an order of magnitude longer than our study reach. Even over hundreds of kilometers, Horan et al. (2019) found that less than half of petrogenic OC eroded from the Mackenzie River catchment was oxidized during transport. Therefore, it is reasonable to assume that the production and oxidation of rock-derived OC is limited within our study reach and a single  $TOC_{petro}$  end-member is appropriate for cutbanks and another for point bars.

## 225 3 Materials and methods

### 3.1 Field sampling methods

We studied deposits and collected samples from 33 locations along the Koyukuk River near the village of Huslia, Alaska, during June–July 2018 (Fig. 2 inset; Supplemental Fig. S1). Near Huslia, the mean annual air temperature is  $-3.6^{\circ}\text{C}$  (Nowacki et al., 2003; Daly et al., 2015, 2018). The Koyukuk is a meandering river in discontinuous permafrost with well-defined scroll 230 bars (former levees) (Mason and Mohrig, 2019) that demarcate clear spatial patterns of channel lateral migration (Fig. 2) (Shur and Jorgenson, 2007). Seasonal variations in temperature cause an annual freeze-thaw cycle in sediment near the ground surface across the landscape, called the active layer, while the ground below consists of permafrost or is perennially unfrozen. To represent the diversity of floodplain geomorphology, permafrost occurrence, and deposit ages, we selected 8 permafrost cutbanks, 6 non-permafrost cutbanks, 6 permafrost floodplain cores, 4 non-permafrost floodplain cores and pits, and 9 non-



235 permafrost cores and pits in transects across 2 point bar complexes to characterize floodplain stratigraphy and carbon  
geochemistry (Fig. 2; Supplemental Tables S1 & S2). We categorized permafrost as ice-cemented sediment observed during  
our summer field season, often containing ice lenses and other structures indicative of permafrost (Fig. 3a-b) (French and Shur,  
2010). Permafrost cutbanks often had an undercut marking the high water level where bank sediment was directly thawed by  
the river and collapsed as well as abundant toppled trees indicating active bank erosion. We classified terrain without ice  
240 cement observed to the depth of coring or sampling as non-permafrost (Fig. 3a, c). Bands of vegetation outlined scroll bars on  
the floodplain that were abandoned due to channel lateral migration and meander-bend cutoff. Mean bank erosion rates for the  
portion of the Koyukuk we studied were  $0.52 \text{ m yr}^{-1}$  from 1978-2018 (Rowland et al., 2019). Over the same time interval,  
channel width varied from  $173 \pm 43 \text{ m}$  in 1978 to  $179 \pm 43 \text{ m}$  in 2018 (median=1SD), indicating a balance between cutbank  
erosion and point bar deposition over this period since net erosion or deposition would change channel width (Supplemental  
245 Fig. S2).

River bathymetry was characterized using a Teledyne RioPro acoustic Doppler current profiler (ADCP). We calculated a river  
depth of 12.4 as the mean of the deepest measured value for 8 ADCP river cross-sectional transects across a representative  
meander bend. Bank samples were collected by digging into cutbanks and point bars, and cores were taken using a hand auger  
250 in non-permafrost deposits and a Snow, Ice, and Permafrost Research Establishment (SIPRE) corer in permafrost (Fig. 2). All  
samples were recorded in stratigraphic columns to determine the thickness of each stratigraphic unit. Samples were stored in  
sterile Whirlpak bags and frozen within 12 hours of collection, then transported frozen back to a cold room ( $-15^\circ\text{C}$ ) at Caltech  
for laboratory analyses.

We collected samples from 33 locations along the Koyukuk River near the village of Huslia, Alaska, during June – July 2018  
255 (Fig. 2 inset; Fig. S1 in the Supplement). Near Huslia, the mean annual air temperature is  $-3.6^\circ\text{C}$  (Nowacki et al., 2003; Daly  
et al., 2015, 2018). The Koyukuk is a meandering river in discontinuous permafrost (portions of the floodplain are underlain  
by ground below  $0^\circ\text{C}$  while others are not) with well-defined scroll bars (former levees) (Mason and Mohrig, 2019) that  
demarcate clear spatial patterns of channel lateral migration (Fig. 2) (Shur and Jorgenson, 2007). Bands of vegetation outline  
scroll bars on the floodplain that were abandoned due to channel lateral migration and meander-bend cutoff (Fig. 1). Seasonal  
260 variations in temperature cause an annual freeze-thaw cycle in sediment near the ground surface across the landscape, called  
the active layer, while the ground below, in areas of permafrost, is perennially at sub-zero temperatures. To represent the  
diversity of floodplain geomorphology, permafrost occurrence, and deposit ages, we selected 8 permafrost cutbanks, 6 non-  
permafrost cutbanks, 6 permafrost floodplain cores, 4 non-permafrost floodplain cores and pits, and 9 non-permafrost cores  
and pits in transects across 2 point bar complexes to characterize floodplain stratigraphy and carbon geochemistry (Fig. 2;  
265 Tables S1 & S2 in the Supplement). We categorized permafrost as ice-cemented sediment observed during our summer field  
season, often containing ice lenses and other structures indicative of permafrost (Fig. 3a-b) (French and Shur, 2010). Permafrost  
cutbanks often had an undercut marking the high water level where bank sediment was directly thawed by the river and  
collapsed as well as abundant toppled trees indicating active bank erosion. We classified terrain without ice cement observed

270 to the depth of coring or sampling as non-permafrost (Fig. 3a, c), although this category might also include perennial sub-zero  
ground that lacked pore water to form ice cement. Bank samples were collected by digging into cutbanks and point bars, and  
cores were taken using a hand auger in non-permafrost deposits and a Snow, Ice, and Permafrost Research Establishment  
(SIPRE) auger in permafrost (Fig. 2). All samples were recorded in stratigraphic columns to determine the thickness of each  
stratigraphic unit. Samples were stored in sterile Whirlpak bags and frozen within 12 hours of collection, then transported  
frozen back to a cold room (-15°C) at Caltech for laboratory analyses.

275 River bathymetry was characterized using a Teledyne RioPro acoustic Doppler current profiler (ADCP). We calculated a river  
depth of 12.4 m as the mean of the deepest measured value (i.e., the thalweg) for 8 ADCP river cross-sectional transects across  
a representative meander bend. Mean bank erosion rates for the portion of the Koyukuk we studied were 0.52 m yr<sup>-1</sup> averaged  
over the time period of 1978-2018 (Rowland et al., 2019). Over the same time interval, channel width varied from 173±43 m  
280 in 1978 to 179±43 m in 2018 (median±1SD), indicating a balance between cutbank erosion and point bar deposition over this  
period since net lateral erosion or deposition would change channel width (Fig. S2 in the Supplement).

### 3.2 Laboratory analyses

285 Samples were transferred to pre-combusted aluminium foil, weighed on a laboratory scale, and oven dried at 55-60°C to  
calculate the mass fraction of water ( $M_{H_2O,i}$ ). For samples taken using the SIPRE core auger with known volume, bulk density  
( $\rho_i$ ) was calculated from total mass divided by volume. The samples were gently homogenized using an agate mortar and  
pestle, then split using cone-and-quarter or a riffle splitter, to avoid grain size fractionation, for further analysis.

290 Total organic carbon content (TOC,  $TOC_{meas}$  in Eq. 2), stable organic carbon isotopes, and total nitrogen (TN) content were  
measured on a Costech Elemental Analyzer coupled to a MAT 253 IRMS at Los Alamos National Laboratory (LANL). Prior  
to analysis, samples were ground to a powder and approximately 3 mg of each sample was decarbonated by fumigation with  
HCl in silver capsules. Isotope ratios are reported relative to the Vienna Pee Dee Belemnite (VPDB;  $\delta^{13}C = (R_{sample}/R_{VPDB} - 1) \times 1000$ ;  
reported in per mille (‰)) and measured blanks were below peak detection limit. Measurements were calibrated  
using laboratory standards of 25-(Bis(5-tert-butyl-2-benzo-oxazol-2-yl) thiophene (BBOT, Eurovector; TOC = 72.53%,  
measured as 69.59±2.05%;  $\delta^{13}C = -26.6‰$ , measured as -26.6±0.01‰; TN = 6.51%, measured as 6.82±0.24%), Peach  
295 Leaves/peach leaves (1570a; TOC = 44.65%; measured as 44.33±0.96%;  $\delta^{13}C = -25.95‰$ , measured as -26.13±0.08‰; TN =  
2.83%, measured as 3.31±1.27%), and Urea/urea (Eurovector; TOC = 20.00%, measured as 17.98±0.37%; TN = 46.65%,  
measured as 45.88±0.88%) for TOC and TN, and cellulose (IAEA-C3;  $\delta^{13}C = -24.91‰$ , measured as -24.82±0.06‰), sucrose  
(IAEA-C6;  $\delta^{13}C = -10.8‰$ , measured as -10.7±0.03‰) and oxalic acid (IAEA-C8;  $\delta^{13}C = -18.3‰$ , measured as -18.5±0.06‰)  
for stable COC isotopes, with uncertainties reported as 1 standard deviation (±1SD). Stable OC isotope values of  $\delta^{13}C$  and TN  
300 measurements/content are not discussed in the main text but are included in supplemental figures and tables.

Radiocarbon content was measured on a subset of sample at the National Ocean Sciences Accelerator Mass Spectrometry (NOSAMS) facility in Woods Hole. Sample splits for radiocarbon were ground to a powder and decarbonated at Caltech in pre-combusted glassware using 1M HCl, sonicated for 10 min, and neutralized using 1M NaOH. Splits were then-centrifuged for 10 min, and had the supernatant was removed using a pipette. The samples were-then rinsed using 20 mL Milli-Q water, centrifuged and decanted twice before being lyophilized and sent to the National Ocean Sciences Accelerator Mass Spectrometry (NOSAMS) facility in Woods Hole to be measured for radiocarbon activity ( $Fm_{meas}$  in Eq. 3). NOSAMS also reported total organic carbon content (dry wt% with 5% measurement uncertainty) and organic carbon stable isotope measurements (referenced to VPDB;  $\delta^{13}C = (R_{sample}/R_{VPDB}-1)\times 1000$ ; reported in per mille (‰)). A comparison of OC measurements between NOSAMS and LANL is plotted in Supplemental Figure S5(‰), and these produced similar results as LANL (Figure S5 and Table S2 in the Supplement). We used LANL OC contents in subsequent analyses because they reported smaller uncertainties and because we made measurements at LANL for all samples. NOSAMS data is used only for Fm values of the sample subset.

Sample splits for grain size analysis were split using a riffle splitter and placed into sterile polypropylene Falcon tubes to remove carbonate and organic materials (Gee and Or, 2002)(Gee and Or, 2002). Samples were acidified overnight with 1M HCl, then centrifuged for 15 min at 4,000 rpm and decanted; rinsed twice with DI H<sub>2</sub>O, centrifuged and decanted before being oven-dried at 55-60°C; and then reacted with H<sub>2</sub>O<sub>2</sub> on a hot plate at 85°C to remove organics. Floating pieces of organic material were removed using a microspatula rinsed with DI H<sub>2</sub>O. Additional H<sub>2</sub>O<sub>2</sub> was added until reactions ceased by visual inspection. Samples were rinsed and centrifuged three times before oven drying. Each sample was re-hydrated using DI H<sub>2</sub>O, Calgon ~10 mL of 10 g (NaPO<sub>3</sub>)<sub>6</sub> (sodium hexametaphosphate) per 1 L DI H<sub>2</sub>O was added to prevent flocculation, and samples were sonicated for 3 min. The samples were split while wet using a riffle splitter to the required sediment concentration for laser diffraction, and grain size was measured using laser diffraction on a Malvern Mastersizer 2000, with measurements calibrated against a laboratory silica carbide standard (median diameter,  $D_{50} = 13.184 \pm 0.105 \mu m$  throughout our measurements). Grain size data were used to validate confirmed our field observations of grain size that were made using a sand card (Supplemental and hand lens (Table S5); in the Supplement).

Formatted: Font: Italic

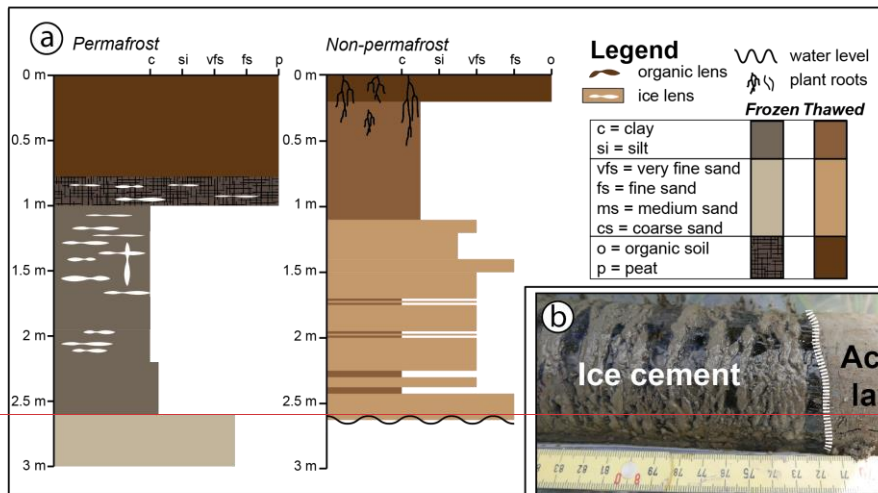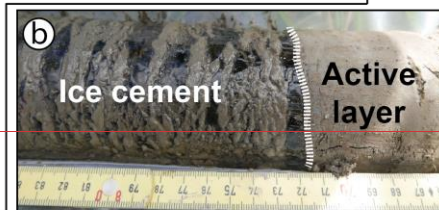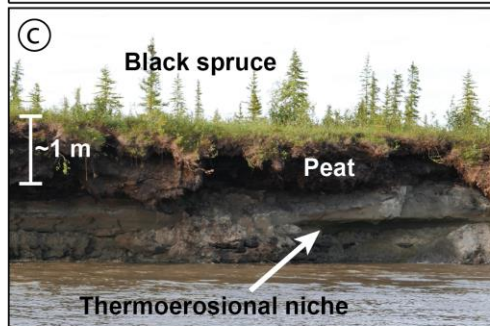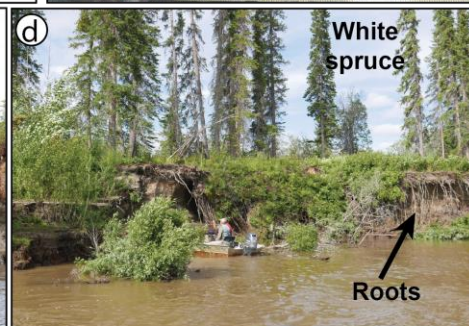

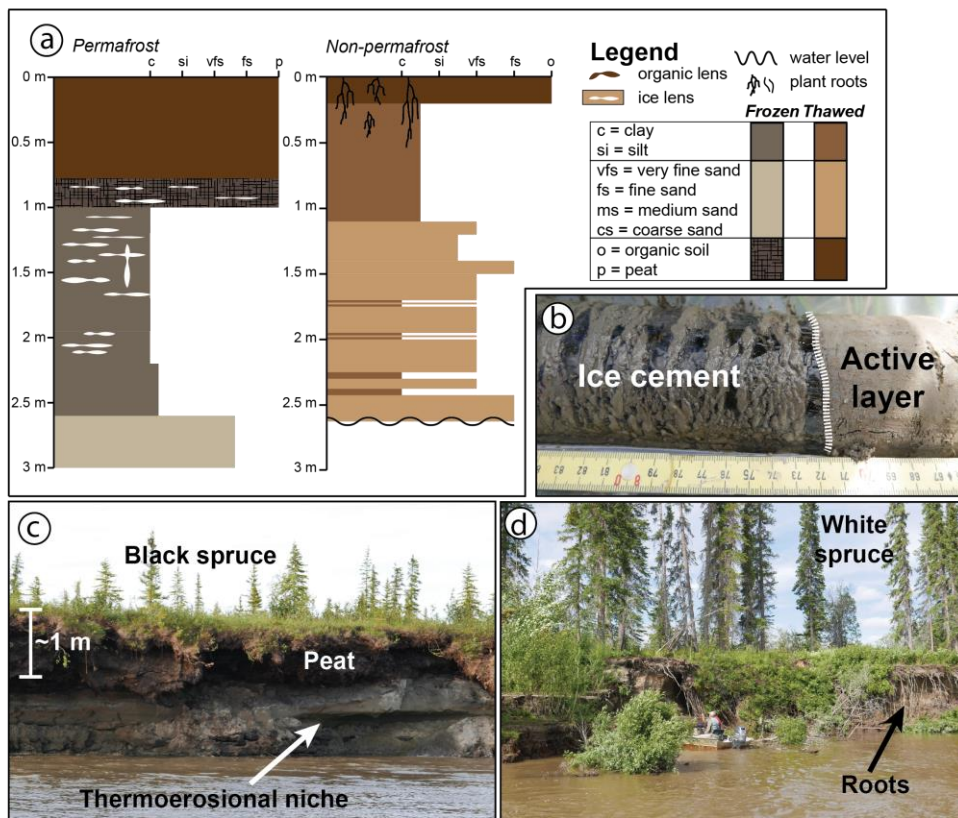

330 **Figure 3:** Field observations of Koyukuk **riverbanks and floodplain sedimentology/stratigraphy**. (a) Representative stratigraphic columns from non-permafrost (Bank 2) and permafrost (Bank 6) cutbanks. (b) Field photo of boundary between permafrost ice cement and the overlying active layer in Core 4. (c) Thermoerosional niche formed in a permafrost cutbank, with silty permafrost overlain by a layer of peat and black spruce trees. (d) Eroding riverbank without permafrost, hosting a white spruce forest with roots that reach deep into the bank sediment. Complete stratigraphic sections and additional field photos are in **Supplemental Figures Fig. S2-3S3 in the Supplement**.

335 **4 Results**

Permafrost cutbanks and floodplains generally displayed an organic-rich upper horizon, which extended up to 1.3 m below the ground surface in peat, underlain by silt that abruptly transitioned to sand (Fig. 3a, d; **Supplemental-Fig. S3**); **in the**

340 Supplement). The thickness of the active layer, measured by trenching or using a 1-m permafrost probe (n=53), ranged from 40 cm to greater than the length of the probe, with a median of measured values (n=38) of approximately 75 cm. Non-permafrost cutbanks had a layer of organic topsoil overlying silt with abundant roots and organic-rich lenses that became interbedded and then transitioned to sand with increasing depth (Fig. 3a). All terrain types exhibited a trend of grain size fining upward, with medium sand (based on bed-material grab samples taken from a boat with a Ponar sampler) comprising the channel-bed material. We did not observe permafrost in active point bars, which had a thin to absent layer of organic topsoil at the land surface underlain by sandy deposits exhibiting ripple and dune cross stratification that indicated active from sediment re-working transport and deposition. Sediment TOC content and radiocarbon-Fm measurements values varied with sediment size. Silt samples had higher average TOC content than sandy samples, and peat had higher TOC content than topsoil (Fig. 4a). Although the organic horizons overlying permafrost had a higher TOC content than the organic horizons overlying non-permafrost deposits, sediment samples below the organic horizon did not show a significant difference in TOC content based on the presence or absence of permafrost for a given grain size (Fig. 4a-b). The strong dependence of TOC content on grain size allowed us to calculate estimate OC stocks based on measured stratigraphic sections.

355 Coarser sediment yielded lower radiocarbon-Fm values—indicative of older organic carbon—with silt and organic horizons having higher Fm values (Fig. 4c). A petrogenic contribution can explain measured differences in sediment Fm and would be expected to be enriched in the coarser size fraction (Galy et al., 2007)(Galy et al., 2007). To calculate the petrogenic range of  $TOC_{petro}$  and biospheric  $Fm_{bio}$  end-members for soil cutbank and point bar sediment OC, we fit the relationship fitted a nonlinear regression (nlinfit.m in Matlab 2017) between  $Fm_{meas}$  and  $TOC_{meas}$  using Eq. (4) and the Matlab 2017 function nlinfit.m, using iterated fitting used the Jacobian to calculate 95% confidence intervals (Fig. 4c). Fitting  $Fm_{meas}$  to  $TOC_{meas}$  gave a range of biospheric radiocarbon ( $Fm_{bio}$ ) and petrogenic OC content ( $TOC_{petro}$ ) end-members (with 95% confidence intervals) of  $Fm_{bio} = 0.847 \pm 0.084$  and  $TOC_{petro} = 0.108 \pm 0.045$  wt%. Due to some cutbank samples had  $\delta^{13}C$  greater than -20‰, raising concerns about incomplete carbonate removal from differences in decarbonation procedures (see Supplemental Fig. S4), we also fit Fm to TOC leaving out points with  $\delta^{13}C$  greater than -20‰, generating  $Fm_{bio} = 0.892 \pm 0.118$  (Table S2 in the Supplement). However, fitting  $Fm_{meas}$  to  $TOC_{meas}$  for cutbank and  $TOC_{petro} = 0.213 \pm 0.181$  wt%. These values are within uncertainty of the values from fitting with all the data points. Fitting to TOC:TN weight ratios yielded  $Fm_{bio} = 0.956 \pm 0.126$  and leaving out high  $\delta^{13}C$  gave  $Fm_{bio} = 0.953 \pm 0.217$ ; these values agreed with the estimates from the TOC fits but with more uncertainty. floodplain samples together but excluding samples with  $\delta^{13}C$  greater than -20‰ (n = 13) generated a fit with similar end-members and confidence intervals. Therefore, we present due to the fit small number of the complete Fm radiocarbon activity, we did not exclude the high  $\delta^{13}C$  samples from our analysis.

370 The 95% confidence intervals for  $Fm_{bio}$  of the cutbanks and TOC datasets in Fig. 4d. A fitted value of  $Fm_{bio} < 1$  indicated the presence of an aged biospheric endmember in floodplain sediment. This result was within the range of our measurements of point bars overlapped with Fm values from cm-scale wood fragments collected from within sediment bank samples and cores

Formatted: Font: Italic

(Fm ~~ranging from~~  $0.2319 \pm 0.0015$  to  $0.9843 \pm 0.0027$ , equivalent to radiocarbon ages of  $11,750 \pm 55$  to  $125 \pm 20$  yr BP); ~~since~~.  
Since woody debris ~~does not contain any~~ is devoid of petrogenic OC, its Fm directly reflects storage and aging in these deposits.  
Therefore, we inferred that non-permafrost point bars also likely contained some aged biospheric OC.

375

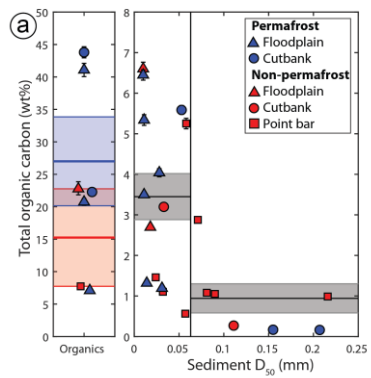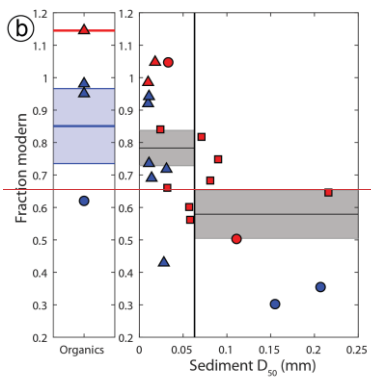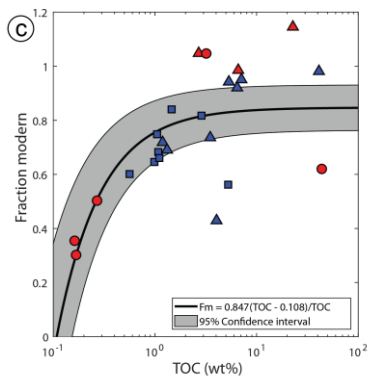



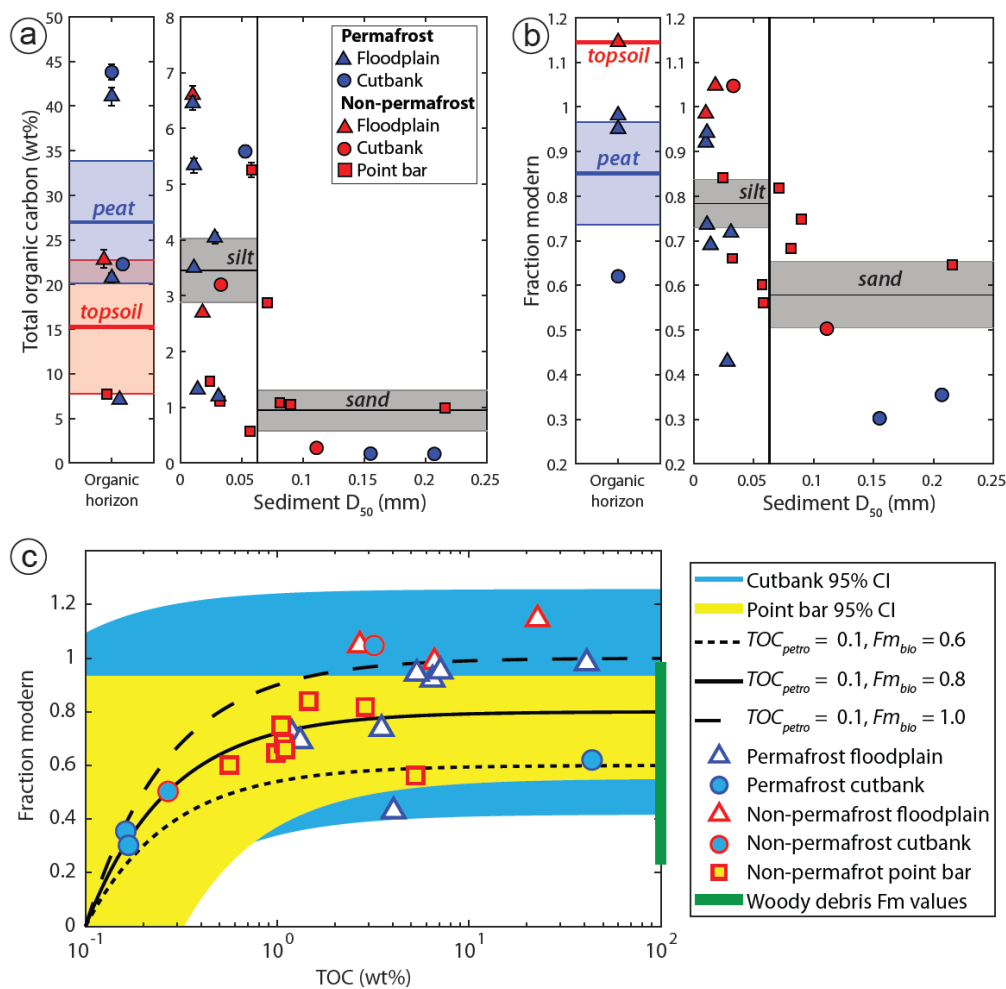

Figure 4: Floodplain sediment geochemistry results. (a) Total organic carbon versus median sediment grain size, with organic horizons split into ice-rich permafrost peat and non-permafrost topsoil, with 1SD error bars. The horizontal lines indicate the mean and shaded region the standard error of the mean for the peat (n=5, blue shading), topsoil (n=2, red shading), silt ( $D_{50} < 0.63$  mm, n=14, grey shading), and sand ( $D_{50} > 0.63$  mm, n=7, grey shading) grain size classes. (b) Radiocarbon composition activity (reported as fraction modern, Fm) versus median grain size, with 1SD error bars and shaded regions indicating the mean and standard error of the mean for peat (n=3), topsoil (n=1), silt (n=13), and sand (n=7). (c) Sediment sample fraction modern ( $F_{m_{meas}}$ ) plotted against

385 TOC content ( $TOC_{meas}$ ) and fit using Eq. (74) to calculate end-members for biospheric radiocarbon fraction modern ( $F_{m_{bio}}$ ) and petrogenic organic carbon content ( $TOC_{petro}$ ). The 95% confidence intervals (CI) for cutbanks and point bars are shaded in blue and yellow, with the horizontal upper bound on the point bar CI representing  $TOC_{petro} = 0.0$  wt%. Black lines denote mixing between representative values of  $TOC_{petro}$  and  $F_{m_{bio}}$ . The range of woody debris Fm values is plotted on the right y axis, indicating the likely range of biospheric end-members.

390 To compare the  $F_{m_{bio}}$  of sediment samples from different terrain types, we assumed a constant  $TOC_{petro}$  and calculated  $F_{m_{bio}}$  for each sediment sample based on measured sediment Fm and TOC (Fig. 5c), propagating through 95% confidence intervals from fitting the petrogenic end member (Fig. 4d). We found that all grain size classes had the same calculated  $F_{m_{bio}}$  within uncertainty, indicating that the relationship between Fm and grain size was due to changes in  $f_{petro}$  (Fig. 5c & 4d). All terrain types contained samples with  $F_{m_{bio}} < 1$ , implying that all floodplain  $TOC_{bio}$  had been aged independently of the terrain type, including the presence or absence of permafrost.

## 5 Analysis: organic carbon cycling by river meandering

### 5.1 Mass Carbon mass balance model for a meandering river

To evaluate particulate OC fluxes into and out of the Koyukuk River, we used a mass-balance model applicable to single-threaded, meandering rivers (Fig. 1a), neglecting fluxes due to dissolved OC and woody debris. Our model includes vertical variations in floodplain structure and their corresponding OC stocks, following similar floodplain river exchange models (Lauer and Parker, 2008). While other models exist that incorporate more complex boundary conditions and sediment tracking (Lauer and Parker, 2008; Malmon et al., 2003; Lauer and Willenbring, 2010), we sought a simple framework in order to use our field data to constrain carbon fluxes. We considered POC fluxes into the river due to cutbank erosion ( $F_{CB}$ ; kg yr<sup>-1</sup>), and out of the river due to POC being deposited in point bars ( $F_{PB}$ ; kg yr<sup>-1</sup>) or overbank deposits ( $F_{OB}$ ; kg yr<sup>-1</sup>) or oxidized during transport and released to the atmosphere as CO<sub>2</sub> ( $F_{OX}$ ; kg yr<sup>-1</sup>; Fig. 1b) (Striegl et al., 2012; Denfeld et al., 2013; Serikova et al., 2018). 1b), neglecting fluxes due to dissolved OC and woody debris. Our model includes vertical variations in floodplain structure and their corresponding OC stocks, following similar floodplain river exchange models (Lauer and Parker, 2008). While other models exist that incorporate more complex boundary conditions and sediment tracking (Lauer and Parker, 2008; Malmon et al., 2003; Lauer and Willenbring, 2010), we sought the simplest possible framework that could utilize our field data to constrain carbon fluxes. We considered POC fluxes into the river due to cutbank erosion ( $F_{CB}$ ; kg yr<sup>-1</sup>), and out of the river due to POC being deposited in point bars ( $F_{PB}$ ; kg yr<sup>-1</sup>) or overbank deposits ( $F_{OB}$ ; kg yr<sup>-1</sup>) or oxidized during transport and released to the atmosphere as CO<sub>2</sub> ( $F_{OX}$ ; kg yr<sup>-1</sup>; Fig. 1b) (Striegl et al., 2012; Denfeld et al., 2013; Serikova et al., 2018). This net budget is represented by:

$$\frac{d(\text{POC})}{dt} = F_{CB} - F_{PB} - F_{OB} - F_{OX}, \quad (65)$$

415 These fluxes were calculated using the mean lateral migration rate over 83 km river length comprising 8 meander bends in our study (Fig. 2). We averaged over a long river length in an attempt to capture the characteristic sediment transport distances

between depositional events (Pizzuto et al., 2014) and variation in local erosion rate due to channel curvature (Sylvester et al., 2019; Howard and Knutson, 1984) and the formation of cutoffs and oxbow lakes. We calculated the mean bank erosion rate by first averaging the area of floodplain eroded (1.60 km<sup>2</sup>) and accreted (1.85 km<sup>2</sup>) from previously published erosion masks generated using Landsat imagery (Rowland et al., 2019). Dividing this area by the length of the channel reach centerline (82.823 km) and the measurement interval for the erosion masks (2018–1978) resulting in a mean lateral migration rate of 0.52 m yr<sup>-1</sup>.

To quantify POC fluxes due to channel migration, we approximated the flux into the river due to cutbank erosion as  $F_{CB} = L \times E \times C_{CB}$ , where  $L$  is a representative river reach length (1 m);  $E$  is the bank erosion rate (0.52 m yr<sup>-1</sup>); and  $C_{CB}$  is the carbon content of the cutbank (kgOC m<sup>-3</sup>), defined by:

In the subsequent sections, we estimate the organic carbon stocks to find  $F_{CB}$  and  $F_{PB}$  in Eq. (5), and then discuss the relative magnitudes of  $F_{OB}$  and  $F_{OX}$ .

## 5.2. Floodplain organic carbon stocks

To quantify the fluxes of carbon in and out of the river due to bank erosion and bar deposition, we first needed to estimate the carbon stocks in the floodplain. Our approach was to first take advantage of particle-size correlations with TOC content (Fig. 4a-b), as discussed in detail below, to estimate carbon contents for stratigraphic units where we only had grain size information. This process increased our sample size from 9 to 30 complete stratigraphic sections. Next, we used our mapping of floodplain stratigraphy and grain size to estimate carbon stocks integrated over a characteristic depth of the floodplain. We produced this analysis using two different characteristic depths for comparison. A depth of 1 m was used for comparison to previous studies that often only sampled in the top meter of the floodplain (Hugelius et al., 2014). The second depth we used was the depth of the Koyukuk River, 12.4 m, because ultimately this is the thickness of floodplain material that is being eroded and deposited by the river. In Section 5.3, these depth-integrated carbon concentrations are used to estimate carbon fluxes due to bank erosion and bar deposition.

$$\text{Measured } C_{CB} = \frac{\sum_{i=1}^n \rho_i \times H_i \times C_i (1 - M_{H_2O,i})}{\text{---}} \quad (7)$$

We accounted for  $n$  stratigraphic units (e.g., sand and mud beds) that may have different carbon contents, where  $\rho_i$  is the mean unit bulk density (kg wet sediment per m<sup>3</sup>),  $H_i$  is the unit thickness (m),  $C_i$  is its total OC by mass (kgOC per kg dry sediment of each unit) and  $M_{H_2O,i}$  is the mass fraction of water in the unit (kg H<sub>2</sub>O per kg wet sediment of each unit). The point bar carbon flux was similarly calculated using  $F_{PB} = L \times E \times C_{PB}$ , where  $C_{PB}$  is the carbon content of the point bar (kgOC m<sup>-3</sup>).

Floodplain sediment OC stocks were calculated using trends in TOC and Fm with median sample grain size (Fig. 4a-b). The measured stratigraphic sections were divided into 4 units (Supplemental Fig. S4 in the Supplement): sand ( $D_{50} > 63 \mu\text{m}$ ), mud ( $D_{50} < 63 \mu\text{m}$ ), topsoil (organic horizons overlying non-permafrost sediment) and peat (organic horizons overlying permafrost). We used these groups and calculated the  $C_{CB}$  or  $C_{PB}$  for each sampled location using Eq. (7), with stratigraphic unit height ( $H_i$ ) taken from the stratigraphic column at each location (Supplemental Fig. S3). We used the mean TOC ( $c_i$ ) and mass fraction of water ( $M_{H_2O,i}$ ) from each unit, and assigned these average values to the corresponding units for beds where we measured grain size, but did not measure TOC. We quantified the uncertainty in  $c_i$  and  $M_{H_2O,i}$  using Gaussian error propagation of 1 standard deviation as the value of the sand, mud, topsoil, and peat stratigraphic units (Supplemental Tables S2-S4), in the Supplement).

To estimate carbon stocks, total OC measurements and estimated values for each unit (Fig. 4a; Fig. S6-S7 in the Supplement) were integrated both over 1 m depth below the surface (Fig. 5a) and over a depth equivalent to the bankfull river depth (12.4 m; Fig. 5b). We calculated the depth-integrated OC stock using

$$C_{CB} = \sum_{i=1}^n \rho_i \times H_i \times c_i (1 - M_{H_2O,i}) \quad (6)$$

We accounted for  $n$  beds of the four stratigraphic units in each measured stratigraphic section, where  $\rho_i$  is the mean unit bulk density ( $\rho_i$ ) across all stratigraphic units, because bulk kg wet sediment per  $\text{m}^3$ ,  $H_i$  is the unit thickness (m),  $c_i$  is the mass fraction of OC in the unit (kg OC per kg dry sediment of each unit), and  $M_{H_2O,i}$  is the mass fraction of water in the unit (kg  $\text{H}_2\text{O}$  per kg wet sediment of each unit).  $M_{H_2O,i} + M_{dry,i} = 1$ , with  $M_{dry,i}$  being the mass fraction of dry sediment in the unit (kg dry sediment per kg wet sediment of each unit). Bulk densities measured from core samples for mineral (mean  $\pm$  SD of  $989 \pm 323 \text{ kg m}^{-3}$ ,  $n=7$ ) and organic ( $905 \pm 49 \text{ kg m}^{-3}$ ,  $n=2$ ) horizons were the same within uncertainty (Supplemental Table S2 Table S2 in the Supplement). Therefore, we used a constant mean bulk density ( $\rho_i = 971 \pm 283$ ) across all stratigraphic units (Table S3 in the Supplement).

Total OC measurements (Fig. 4a; Supplemental Fig. S6-7) were averaged for each grain size class and integrated over 1 m depth below the surface (Fig. 5a) and a bank thickness equivalent to the bankfull depth (12.4 m; Fig. 5b). Measurement and sampling were only possible on the exposed section of the riverbank, above the water table. Exposed sections represented 7-47% of total bank height (as measured from channel thalweg to bank top), whereas the rest was submerged and inaccessible. We assumed all sediment below the base of our stratigraphic sections consisted of sand, which was supported by our measurements of grab samples of the active channel and cores of the floodplain beyond 2 m depth (Supplemental Fig. S3), and was consistent with downward coarsening trends widely observed in meandering rivers and their deposits (Supplemental Tables S3 & S4) (Miall, 2013). To evaluate the sensitivity of our results to this assumed stratigraphy, we also summed the

carbon content to 1 m depth below the ground surface. These 1 m OC stocks also allowed us to compare to previous work, as soil OC stocks are commonly calculated for the upper 1 m of the soil column (Hugelius et al., 2014).

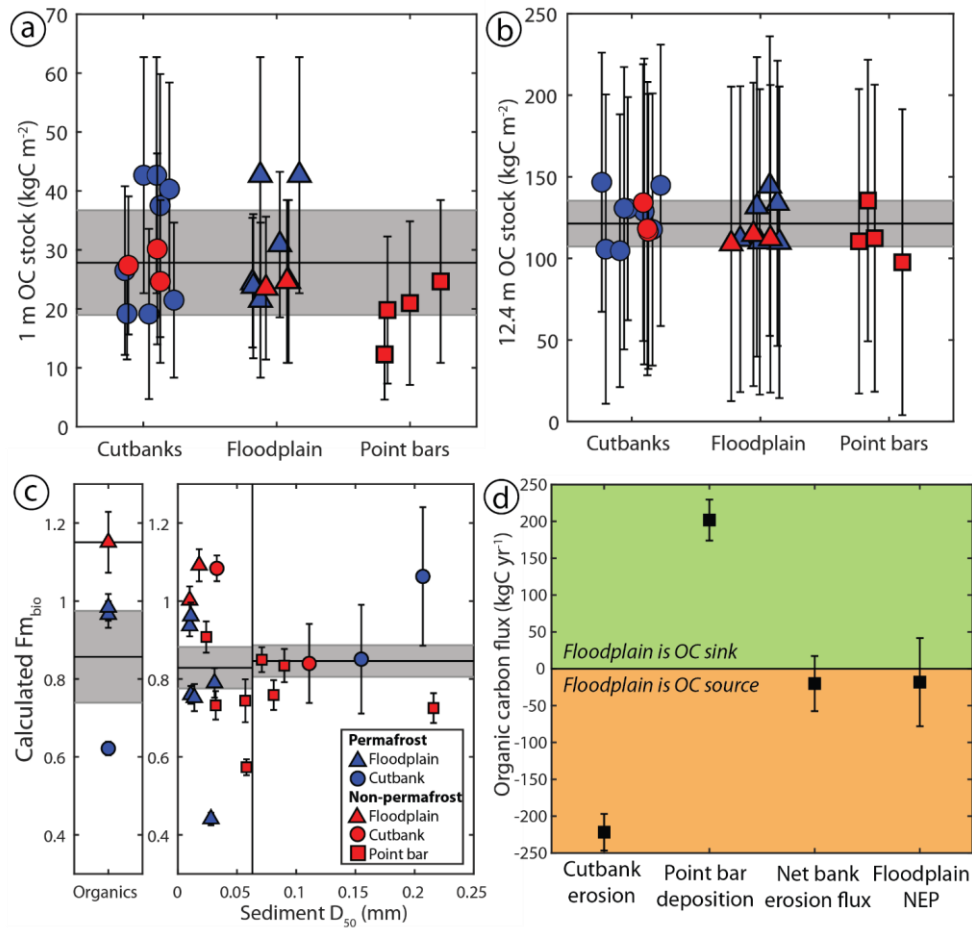

Measurement and sampling were only possible on the exposed section of the riverbank, above the water level. Exposed sections represented 7-47% of total bank height (as measured from channel thalweg to bank top). We assumed all sediment below the base of our stratigraphic sections consisted of sand, which was supported by our measurements of grab samples of the active

485

channel and cores of the floodplain beyond 2 m depth (Fig. S3 in the Supplement), and was consistent with downward-coarsening trends widely observed in meandering rivers and their deposits (Tables S3-S4 in the Supplement) (Miall, 2013).

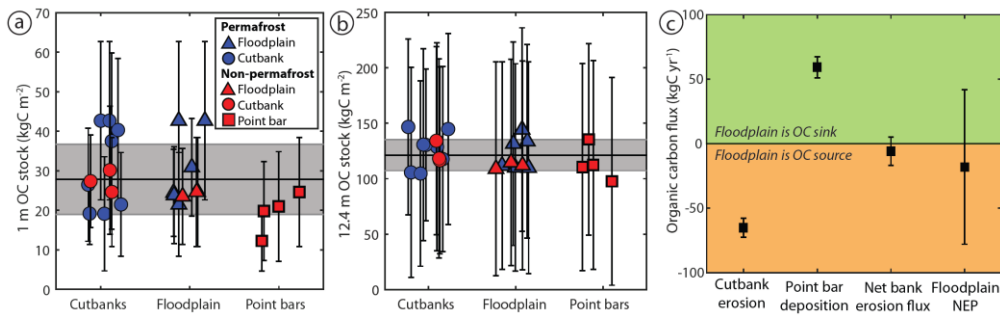

490 **Figure 5: Carbon cycling due to river meandering.** (a) Total organic carbon (OC) in each stratigraphic column integrated to 1 m below surface, with unmeasured portions of the section assumed to be sand, and horizontal lines indicate the mean and shaded regions 1SD for the complete dataset. (b) Total organic carbon in each stratigraphic column integrated to mean channel depth (12.4 m) using the same assumptions and uncertainty. (c) Calculated fraction modern ( $F_{m_{100}}$ ) of the biospheric organic carbon component versus grain size. Shaded regions are the mean and standard error of the mean for each grain size class. (d) The net OC flux due to channel migration is comparable to floodplain net ecological productivity (NEP), and both are zero within uncertainty. The net flux of OC into the river due to erosion of cutbanks and out of the river due to sediment deposition in point bars in the Koyukuk River is calculated as the mean OC stock for each landform (with  $\pm$ 1SD OC stock uncertainty for that landform) multiplied by an average channel migration rate for a 1 m downstream section of riverbank. The cutbank and point bar fluxes are differenced to calculate the net bank erosion flux. Floodplain NEP is calculated for a 10 km wide, 1 m downstream distance section of floodplain using previously reported regional NEP and uncertainties (Potter et al., 2013) (Potter et al., 2013).

## 5.2 Floodplain organic carbon stocks

Estimated permafrost cutbank and floodplain OC stocks integrated to 1 m depth were  $31.1 \pm 9.8$  kgOC m<sup>-2</sup> (mean  $\pm$ 1SD of OC stocks; n=14), while non-permafrost cutbanks, floodplains and point bars contained  $23.3 \pm 4.8$  kgOC m<sup>-2</sup> (n=10) (Fig. 5a). The Mann-Whitney U-test found that OC stocks in permafrost and non-permafrost deposits had similar organic content distributions ( $p=0.1669$ ). Grouping results by terrain type, permafrost and non-permafrost cutbanks had  $30.2 \pm 9.2$  kgOC m<sup>-2</sup> (n=11), permafrost and non-permafrost floodplains had  $28.8 \pm 8.3$  kgOC m<sup>-2</sup> (n=9), and non-permafrost point bars had  $19.4 \pm 5.2$  kgOC m<sup>-2</sup> (n=4). The Mann-Whitney U-test could not reject the null hypothesis of cutbank and floodplain OC stocks being drawn from the same distribution at 5% confidence ( $p=0.7891$ ), but the test found weak evidence for point bars having distinctly lower OC stocks ( $p=0.0503$  for floodplains versus point bars,  $p=0.0601$  for point bars versus cutbanks). Therefore, floodplains and cutbanks generally have had higher OC stocks in their upper 1 m of sediment than point bars, but we did not observe a significant difference in 1 m OC stocks between permafrost and non-permafrost deposits (Fig. 5a).

Estimated permafrost cutbank and floodplain OC stocks integrated over the channel depth were  $125.1 \pm 14.9$  kgOC m<sup>-2</sup> (mean  $\pm$ 1SD of OC stocks; n=14), while non-permafrost cutbanks, floodplains and point bars contained  $116.1 \pm 11.4$  kgOC m<sup>-2</sup> (n=10)

515 (Fig. 5b). The Mann-Whitney U-test could not reject the null hypothesis that OC stocks in permafrost and non-permafrost  
deposits had the same organic content distributions ( $p=0.3641$ ). Grouping results by terrain type, permafrost and non-  
permafrost cutbanks had  $125.3 \pm 13.1$  kgOC m<sup>-2</sup> (n=11), permafrost and non-permafrost floodplains had  $121.0 \pm 13.5$  kgOC m<sup>-2</sup>  
(n=9), and non-permafrost point bars had  $114.0 \pm 15.7$  kgOC m<sup>-2</sup> (n=4). Again, the Mann-Whitney U-test could not reject the  
520 null hypothesis of all landform OC stocks being drawn from the same distribution at 5% confidence ( $p=0.3619$  for floodplains  
versus cutbanks,  $p=0.8252$  for floodplains versus point bars,  $p=0.2799$  for point bars versus cutbanks). Therefore, the  
distribution of OC stocks integrated to channel depth for cutbanks was indistinguishable from the distribution of measured  
stocks of newly deposited point bars (Fig. 5b).

### 5.3 Carbon fluxes from river meandering

525 We used the OC stocks calculated to channel depth to quantify POC fluxes due to lateral channel migration ( $F_{CB}$  and  $F_{PB}$  in  
Eq. 5). We averaged the lateral migration rate over 83 km river length comprising 8 meander bends (Fig. 2) to capture the  
characteristic sediment transport distances between depositional events (Pizzuto et al., 2014), variation in local erosion rate  
due to channel curvature (Sylvester et al., 2019; Howard and Knutson, 1984), and the formation of cutoffs and oxbow lakes.  
We calculated the mean bank erosion rate by averaging the area of floodplain eroded (1.60 km<sup>2</sup>) and accreted (1.85 km<sup>2</sup>) from  
530 previously published erosion masks generated using Landsat imagery (Rowland et al., 2019). Dividing this area by the length  
of the channel reach centerline (82.823 km) and the measurement interval for the erosion masks (2018-1978) resulted in a  
mean lateral migration rate of 0.52 m yr<sup>-1</sup>.

We approximated the flux into the river due to cutbank erosion as  $F_{CB} = L \times E \times C_{CB}$ , where  $L$  is a unit river reach length (1  
m);  $E$  is the bank erosion rate (0.52 m yr<sup>-1</sup>); and  $C_{CB}$  is the cutbank carbon stock (kgOC m<sup>-2</sup>). The point bar carbon flux was  
535 similarly calculated using  $F_{PB} = L \times E \times C_{PB}$ , where  $C_{PB}$  is the carbon stock of the point bar (kgOC m<sup>-2</sup>). Using OC stocks  
integrated to channel depth, we estimated fluxes of POC due to bank erosion as  $F_{CB} = 222 \pm 2565.2 \pm 7.3$  kgOC yr<sup>-1</sup> and due to  
point bar deposition as  $F_{PB} = 202 \pm 2859.3 \pm 8.2$  kgOC yr<sup>-1</sup> (Fig. 5d5c). This result means that that OC fluxes due to bank erosion  
and bar deposition were equal within the uncertainty of our calculations if we only consider fluxes due to cutbank erosion  
( $F_{CB}$ ) and point bar deposition ( $F_{PB}$ ).

540 We used radiocarbon measurements to evaluate if (1) the OC being eroded from cutbanks was oxidized during transport ( $F_{ox}$ );  
(2) the eroded OC was re-deposited in bars via lateral accretion ( $F_{PB}$ ) or overbank deposits ( $F_{OB}$ ), or (3) new biospheric OC  
was being added to point bars and floodplains by vegetation growth after sediment deposition. Similar to TOC and TN,  $F_m$   
displayed a trend of higher values for finer grain sizes—a pattern consistent with prior findings that reflects the greater  
545 petrogenic OC contribution in coarser material (Hilton et al., 2015; Galy et al., 2007). When sediment radiocarbon content was  
corrected for the petrogenic contribution,  $F_{m_{cor}}$  did not exhibit a grain size dependence but did show evidence for *in situ*

biospheric production. This implies that biospheric OC had a similar  $F_m$  for all grain sizes, but that fine sediment tended to contain a higher  $F_{m_{bio}}$ , potentially due to being located in upper sedimentary strata.

We used radiocarbon measurements to evaluate if (1) the OC being eroded from cutbanks was oxidized during transport ( $F_{ox}$ ), (2) the eroded OC was re-deposited in bars via lateral accretion ( $F_{PB}$ ) or overbank deposits ( $F_{OB}$ ), or (3) new biospheric OC was being added to point bars and floodplains by vegetation growth after sediment deposition. Similar to TOC and TN contents,  $F_m$  displayed a trend of higher values for finer grain sizes—a pattern consistent with prior findings that reflects the greater proportional petrogenic OC contribution in coarser material (Hilton et al., 2015; Galy et al., 2007). Coarser sediment tended to have lower TOC content, potentially indicating that low  $F_m$  values are in part due to a greater fraction of petrogenic OC ( $f_{petro}$ ). When we fit a range of mixing models to assess sediment biospheric radiocarbon activity, we found that sediment from cutbanks and point bars had similar ranges of potential biospheric OC end-members (Fig. 4c). This observation matched the range of aged woody debris found across the floodplain.

Our mass-balance calculation, and the presence of aged  $F_{m_{bio}}$  being present in newly deposited point bars, both support the hypothesis that a significant fraction of OC eroded from cutbanks is re-deposited in the floodplain and not oxidized during transport. In addition to point bar deposition, OC could be lost from the river via overbank deposition ( $F_{OB}$ ). In this case, one would expect the carbon stocks to increase on floodplain surfaces of increasing age due to the deposition of silt units near the surface. Our measurements did indicate a slight increase in 1 m OC stocks between recently deposited point bars and floodplain inferred to be older based on their distance to the river (Fig. 5a), but they did not show a significant increase in OC stock when integrated to channel depth (Fig. 5b). One possible explanation could be that  $F_{OB}$  is substantial, but that this carbon has been remineralized and lost to the atmosphere. To constrain the frequency of overbank flooding along the Koyukuk River near Huslia, we examined the Landsat image record and did not find instances of overbank flooding. Ice jams, where floating ice piles up and causes high water during spring break up along Arctic rivers, occurred only four times near Huslia from 1967 – 2019, and in these cases, overbank flooding did not occur (White and Eames, 1999). Therefore, historical records suggest that sediment fluxes due to overbank sediment deposition are relatively minor compared to fluxes due to channel migration. Our stratigraphic observations showing the similar thickness of capping silt units in floodplain stratigraphy (with a mean of 1.29 m for cutbank, 0.92 m for floodplain, and 1.55 m for point bar samples; Supplemental-Table S4 in the Supplement), and the low mass fraction of siliciclastic sediment in organic horizons (based on high mass fraction TOC; Fig. 4a) also indicated that overbank deposition of sediment on the distal floodplain is relatively small.

Rather than additional OC from overbank flows, floodplains do appear to accumulate additional OC from *in-situ* biomass production. We observed an increase in organic horizon thickness, from a mean of 0.06 m in point bars to 0.45 m in



cutbank cutbanks and 0.44 m in floodplain deposits, primarily driven by increasing thickness of peat horizons (Supplemental Table S4; in the Supplement). The increase in organic horizon thickness can explain the cutbank and floodplain OC stocks summed to 1 m depth being slightly higher than the point bar 1 m OC stocks. ~~To quantitatively assess the fraction of OC summed to channel depth produced by the biosphere in situ, we used a linear mixing model with a topsoil sample ( $F_m = 1.1507 \pm 0.0781$ ) as an end member for in situ biomass and the lowest measured  $F_m$  in cutbank woody debris ( $F_m = 0.2319 \pm 0.00152$ ) as an end member for OC that has been transported and re-deposited using Eq. (5) (Scheingross et al., 2021). Calculated in situ biospheric inputs were significant—we estimated that point bars have 58% (37–84%, n=8), floodplains have 69% (23–94%, n=10), and cutbanks have 72% (42–93%, n=5) of sediment TOC produced in situ (reported as mean with range of  $F_{in situ}$  and number of sediment samples in parentheses) (Supplemental Table S6).~~ Since OC stocks summed to channel depth were statistically similar between landforms, we expected that there was some oxidation of modern, labile OC during fluvial transport that was replaced after sediment ~~is~~was deposited in a point bar by *in situ* biomass production. In spite of significant *in situ* biospheric OC input, ~~we found that between one quarter to one half of to floodplain sediment through the growth of peat (on permafrost) and an organic-rich topsoil (on non-permafrost), observations of sediment containing old radiocarbon in both cutbanks and point bars indicate that~~ point bar OC has been eroded from upstream and subsequently re-deposited, ~~providing/generating~~ a reservoir of OC that has been aged by sediment storage along the Koyukuk River.

## 6 Discussion

Our mass-balance model indicated that channel migration generated substantial fluxes of OC into the river ( $>20050$  kgOC yr<sup>-1</sup> m<sup>-1</sup> from cutbank erosion). If we assumed that all OC in point bars was deposited with river sediment, the calculated OC fluxes due to bank erosion and bar deposition balanced each other within uncertainty (Fig. 5d5c). However, our radiocarbon analyses indicated that ~~over half a portion~~ of the biospheric OC in point bars was fixed after deposition by local vegetation. This was reflected in slightly higher 1 m OC stocks in cutbanks and floodplain deposits versus point bars. If we instead assumed that around half of OC in eroding cutbanks was oxidized during river transport, ~~based on the estimated contribution of in situ production on point bars,~~ we calculated the river must transport downstream or oxidize  $>10030$  kgOC yr<sup>-1</sup> per meter of river reach. For comparison, measurements of floodplain net ecological productivity (NEP)—the rate of OC fixation minus respiration—indicated an equivalent 10 km wide, 1 m long river reach would emit  $12.1 \pm 39.9$  kgOC yr<sup>-1</sup> (mean  $\pm$  1SD) (Potter et al., 2013)(Potter et al., 2013). Therefore, the ~~high/large~~ depth ( $>10$  m) and migration rates ( $0.52$  m yr<sup>-1</sup>) of the Koyukuk River allow fluxes due to bank erosion and deposition to exceed floodplain NEP, despite the far smaller land area of erosion and deposition along the riverbanks compared to the expansive floodplain. ~~A significant oxidation flux during transport ( $F_{ox}$ ) agrees with sparse observations of very high observed excess dissolved CO<sub>2</sub> and methane in Koyukuk river water. In addition, our results indicate that ~75% of OC liberated by bank erosion comes from below the top meter. Therefore, large downstream OC fluxes from river migration can be attributed to rapid exposure and mobilization of a deep OC reservoir not readily accessible by top-down thaw.~~

615 Channel migration rates we measured reflect the river area eroded versus deposited from 1978-2018, and these migration rates  
are influenced by the cutoff of a narrow river reach that decreases channel length but slightly increases average width (Fig. S2  
in the Supplement). Autogenic processes such as river response to cutoffs and re-visiting areas of the floodplain more or less  
frequently may cause transient changes in downstream OC fluxes along the Koyukuk. However, sparse observations indicate  
very high excess dissolved CO<sub>2</sub> and methane in Koyukuk river water, supporting that there is significant OC oxidation during  
transport (*F<sub>OC</sub>*) (Striegl et al., 2012)(Striegl et al., 2012). HoweverOverall, significant work remains to understand the  
620 partitioning of OC loss between the dissolved and particulate loads, as well as between petrogenic versus biospheric POC,  
particularly since DOC concentration and lability varies seasonally in the headwaters of the Koyukuk (O'Donnell et al.,  
2010)River (O'Donnell et al., 2010).

Our results indicated less variability in OC stocks across the Koyukuk ~~river~~River floodplain than previous work by Lininger  
625 et al. (2019), who found significant variations in OC stocks between geomorphic units in the Yukon Flats. Lininger et al.  
(2019) report OC stocks to a depth of 1 m along the Yukon River and its tributaries and extrapolated the deepest measured  
mineral OC ~~concentrations~~contents to 1 m based on similar OC content in a few samples taken at depth along cutbanks. Similar  
to their results, we found that newly deposited point bars without a thick organic horizon had slightly lower OC stocks for the  
upper 1 m of sediment. Our results also agree with Lininger et al. (~~2019~~)(2019) that the coarser sediment fraction contributes  
630 significant OC and that floodplain sediments can store OC for thousands of years between riverine transport events. However,  
we found little variation with geomorphic unit for OC stocks calculated to the channel depth (12.4 m). Though we included  
organic horizons extending below 1 m, the majority of our OC budget used to calculate fluxes due to channel migration was  
comprised of the more massive sandy deposits with low OC ~~concentration~~content. These differences point to the importance  
of river depth relative to the depth of significant ~~in-situ~~floodplain biospheric OC ~~input~~production and the ~~grain size~~grain size  
635 of the floodplain material at depth. We hypothesize that cutbank and point bar OC stocks will be similar for rivers with coarser  
sediment and channels much deeper than the active layer and rooting depth of vegetation. In contrast, ~~we expect that~~ OC stocks  
in floodplains of fine-grained, shallow rivers ~~will~~might have a higher fraction of their OC oxidized after erosion from cutbanks  
and replaced after deposition in point bars.

640 The presence of aged biospheric OC in newly deposited, non-permafrost point bars along the Koyukuk River illustrated that  
floodplains are important reservoirs of aged OC in sediments both with and without permafrost. Rivers tend to rework younger  
floodplain deposits faster than older floodplain deposits, and this can yield a heavy-tailed distribution of deposit ages and  
carbon storage over thousands of years (Torres et al., 2017)(Torres et al., 2017). Our results supported the idea that a fraction  
of particulate OC has experienced transient mobilization and deposition, and thus becomes naturally aged during transport  
645 through the river-floodplain system. Therefore, particulate OC with old radiocarbon signatures might be attributed to OC  
storage in floodplains, and may not be a diagnostic indicator of permafrost thaw. One might expect better preservation of  
carbon stocks in permafrost deposits. However, our field observations of bank sediment rapidly changing color from gray to

orange when exposed to air imply that thawed floodplain sediments ~~are predominantly~~ may be anoxic, which ~~may~~ would reduce rates of organic matter respiration in non-permafrost deposits. When coupled with cold mean annual temperatures, anoxic non-permafrost terrain might be similarly effective as permafrost in preserving and aging biospheric OC stocks (Davidson et al., 2006; Davidson et al., 2006). Thus, transient storage of particles in floodplains, potentially for thousands of years (Repasch et al., 2020; Repasch et al., 2020; Torres et al., 2019), may delay or diffuse downstream signals of perturbations to the watershed's carbon cycle before reaching long-term monitoring stations at river mouths or sediment depocenters (McClelland et al., 2016; Holmes et al., 2012).

Field Code Changed

~~Climate change is expected to cause a decrease or disappearance of permafrost, which might alter rates of POC oxidation ( $F_{OX}$ ) and overbank deposition ( $F_{OB}$ ) and ultimately downstream riverine POC fluxes. Permafrost thaw is also hypothesized to increase river lateral migration rates (Costard et al., 2003), although such changes have yet to be systematically documented. For the Koyukuk River, higher channel migration rates should, with all else equal, increase the magnitude of OC fluxes due to erosion and deposition and thereby decrease the residence time and age of OC within the floodplain, but possibly with no net change in OC fluxes from the floodplain to the river. However, if, for example, climate change increases the relative importance of overbank deposition of OC rich mud (higher  $F_{OB}$ ) relative to sand bar accretion, then this change would cause a permanent increase in floodplain OC stocks, with associated decreases in OC river fluxes during the transient period of floodplain grain size fining. In contrast, an increase in channel lateral migration relative to overbank flooding would cause floodplains to become sandier and floodplain OC stocks to decline. Furthermore, climate change is altering flood discharge and frequency (Koch et al., 2013; Vonk et al., 2019; Walvoord and Kurylyk, 2016) as well as sediment supply, often associated with thaw slumps (Kokelj et al., 2013; Lantz and Kokelj, 2008; Malone et al., 2013; Shakil et al., 2020). Increases in flood magnitude could cause channel widening (Ashmore and Church, 2001; Walvoord and Kurylyk, 2016), which would increase cutbank OC fluxes relative to point bar fluxes ( $F_{CB} > F_{PB}$ ), creating a transient increase in riverine OC flux. We expect that changes in floodplain hydrology and sedimentation due to climate change will alter downstream particulate OC fluxes and floodplain OC storage along deep, meandering Arctic rivers similar to the Koyukuk. In the process, sediment deposition in river bars should preserve radiocarbon depleted OC and dampen positive feedbacks due to POC being released from permafrost by riverbank erosion as the climate warms.~~

## 7 Conclusions

To evaluate the role of riverbank erosion and bar deposition in liberating organic carbon (OC) from permafrost floodplains, we conducted a field campaign along the Koyukuk River in central Alaska, taking samples of riverbank and floodplain sedimentary deposits. Finer bank sediment had a systematically higher TOC and  $F_m$ . Climate change is expected to cause a decrease or disappearance of permafrost, which might alter rates of POC oxidation ( $F_{OX}$ ), overbank deposition ( $F_{OB}$ ), and ultimately downstream riverine POC fluxes. Permafrost thaw is also hypothesized to increase river lateral migration rates (Costard et al., 2003), although such changes have yet to be systematically documented. For the Koyukuk River, higher channel

685 migration rates should, with all else equal, increase the magnitude of OC fluxes due to erosion and deposition and thereby decrease the residence time and age of OC within the floodplain, but possibly with no net change in OC fluxes from the floodplain to the river. However, if, for example, climate change increases the relative importance of overbank deposition of OC-rich mud (higher  $F_{OB}$ ) relative to sand bar accretion, then this change would cause a permanent increase in floodplain OC  
690 stocks, with associated decreases in OC river fluxes during the transient period of floodplain grain size fining. In contrast, an increase in channel lateral migration relative to overbank flooding would cause floodplains to become sandier and floodplain OC stocks to decline. Furthermore, climate change is altering flood discharge and frequency (Koch et al., 2013; Vonk et al., 2019; Walvoord and Kurylyk, 2016) as well as sediment supply, often associated with thaw slumps (Kokelj et al., 2013; Lantz and Kokelj, 2008; Malone et al., 2013; Shakil et al., 2020). Increases in flood magnitude could cause channel widening  
695 (Ashmore and Church, 2001; Walvoord and Kurylyk, 2016), which would increase cutbank OC fluxes relative to point bar fluxes ( $F_{CB} > F_{PB}$ ), creating a transient increase in riverine OC flux. We expect that changes in floodplain hydrology and sedimentation due to climate change will alter downstream particulate OC fluxes and floodplain OC storage along deep, meandering Arctic rivers similar to the Koyukuk. In the process, sediment deposition in river bars should preserve radiocarbon-depleted OC and dampen positive feedbacks due to POC being released from permafrost by riverbank erosion as the climate warms.

## 7 Conclusions

To evaluate the role of riverbank erosion and bar deposition in liberating organic carbon (OC) from permafrost floodplains, we conducted a field campaign along the Koyukuk River in central Alaska, taking samples of riverbank and floodplain sedimentary deposits. Finer bank sediment had a systematically higher TOC content and  $F_m$  values than coarser sands. We combined measurements on individual samples with measured floodplain stratigraphic columns to calculate OC stocks for cutbanks, point bars and floodplain cores summed to both to 1 m below the surface and extrapolated to the 12.4 m river channel depth. We found that cutbanks had slightly higher OC stocks than point bars at shallow depths. However, that OC stocks calculated to river channel depth did not significantly vary between river cutbanks, floodplain and point bars or with the presence or absence of permafrost. As the Koyukuk River migrates, it is able to rapidly erode this deep OC reservoir, generating substantial OC fluxes from bank erosion and bar deposition. Net OC fluxes due to river migration are of the same order of magnitude as floodplain net ecological productivity, despite the river occupying a small fraction of the land surface. Our results indicate that floodplain processes generated an aged biospheric radiocarbon signature that did not vary with grain size in newly deposited point bars, and variations in sediment  $F_m$  were primarily with grain size may be due to mixing with a petrogenic end-member. We conclude that approximately one-quarter to one-half a portion of biospheric OC that was eroded from cutbanks was preserved through transport and deposition. The presence of radiocarbon-depleted sediment in non-permafrost deposits indicates that aged POC in Arctic rivers is not a unique indicator for the presence of permafrost. Our results highlight that Arctic floodplains are significant reservoirs of OC, and their stratigraphic architecture and morphology influence POC fluxes and radiocarbon ages transmitted downstream. Therefore,

715 sediment deposition in river bars should dampen positive feedbacks due to POC being released from permafrost by riverbank erosion as the climate warms.

#### Data availability

All datasets are included in the manuscript and supplemental material.

#### Author contributions

720 MPL, ~~JCR~~, WWF, AJW, ~~JCR~~, GKL, & MMD conceptualized the study; MPL, AJW, JCR & GKL determined the methodology; MMD, GKL, JCR, PCK, AJW, JS, APP, AJC, & MPL collected field data; MMD, GKL, PCK, & AJW assisted with geochemistry; MPL supervised the work; MMD conducted data analysis and wrote the original draft; and all authors contributed to the review and editing of the [writingmanuscript](#).

#### Competing interests

725 The authors have the following competing interests: One author is a member of the editorial board of Earth Surface Dynamics. The peer-review process was guided by an independent editor, and the authors have also no other competing interests to declare.

#### Acknowledgements

730 We thank the Koyukuk-hotana Athabascans of Huslia, First Chief Norman Burgett and the Huslia Tribal Council for [land access to their land](#), and U.S. Fish and Wildlife Service (USFWS) – Koyukuk National Wildlife refuge for research permitting and logistical assistance. Shawn Huffman, Alvin Attla, and Virgil Umphenour provided field support and local expertise. We also thank [Alex Sessions and Fenfang Wu for use of equipment and assistance with preparing samples for TOC analysis and](#) Matthew Kirby for use of the Malvern Mastersizer and assistance with grain size analysis.

735 We acknowledge financial support from the ~~Caltech Terrestrial Hazards Observation and Reporting Center, Foster and Coco Stanback, and the Linde Family to MPL and WWF; the Caltech Center for Environmental Microbial Interactions to WWF; a Department of Energy Office of Science, Biological and Environmental Research, Earth & Environmental Systems Sciences Division, Subsurface Biogeochemical Research Program Early Career Award to JCR; the National Defense~~[Caltech Terrestrial Hazards Observation and Reporting Center, Foster and Coco Stanback, the Linde Family, and the Resnick Sustainability Institute to MPL and WWF; the Caltech Center for Environmental Microbial Interactions to WWF; National Science](#)

740 [Foundation Awards 2127442 and 2031532; the National Defence](#) Science and Engineering Graduate Fellowship for MMD and PCK; and the Fannie and John Hertz Foundation Cohen/Jacobs and Stein Family Fellowship for PCK.

## References

- Ashmore, P. and Church, M.: The Impact of Climate Change on Rivers and River Processes in Canada, Natural Resources, Canada, 2001.
- 745 Biskaborn, B. K., Smith, S. L., Noetzli, J., Matthes, H., Vieira, G., Streletskiy, D. A., Schoeneich, P., Romanovsky, V. E., Lewkowicz, A. G., Abramov, A., Allard, M., Boike, J., Cable, W. L., Christiansen, H. H., Delaloye, R., Diekmann, B., Drozdov, D., Etzelmüller, B., Grosse, G., Guglielmin, M., Ingeman-Nielsen, T., Isaksen, K., Ishikawa, M., Johansson, M., Johansson, H., Joo, A., Kaverin, D., Kholodov, A., Konstantinov, P., Kröger, T., Lambiel, C., Lanckman, J.-P., Luo, D., Malkova, G., Meiklejohn, I., Moskalenko, N., Oliva, M., Phillips, M., Ramos, M., Sannel, A. B. K., Sergeev, D., Seybold, C., Skryabin, P., Vasiliev, A., Wu, Q., Yoshikawa, K., Zheleznyak, M., and Lantuit, H.: Permafrost is warming at a global scale, *Nat. Commun.*, 10, 1–11, <https://doi.org/10.1038/s41467-018-08240-4>, 2019.
- Blair, N. E., Leithold, E. L., Ford, S. T., Peeler, K. A., Holmes, J. C., and Perkey, D. W.: The persistence of memory: the fate of ancient sedimentary organic carbon in a modern sedimentary system, *Geochim. Cosmochim. Ac.*, 67, 63–73, [https://doi.org/10.1016/S0016-7037\(02\)01043-8](https://doi.org/10.1016/S0016-7037(02)01043-8), 2003.
- 755 Bouchez, J., Beyssac, O., Galy, V., Gaillardet, J., France-Lanord, C., Maurice, L., and Moreira-Turcq, P.: Oxidation of petrogenic organic carbon in the Amazon floodplain as a source of atmospheric CO<sub>2</sub>, *Geology*, 38, 255–258, <https://doi.org/10.1130/G30608.1>, 2010.
- Costard, F., Dupeyrat, L., Gautier, E., and Carey-Gailhardis, E.: Fluvial thermal erosion investigations along a rapidly eroding river bank: application to the Lena River (central Siberia), *Earth Surf. Proc. Land.*, 28, 1349–1359, <https://doi.org/10.1002/esp.592>, 2003.
- Cui, X., Bianchi, T. S., Jaeger, J. M., and Smith, R. W.: Biospheric and petrogenic organic carbon flux along southeast Alaska, *Earth and Planet. Sc. Lett.*, 452, 238–246, <https://doi.org/10.1016/j.epsl.2016.08.002>, 2016.
- Daly, C., Smith, J. I., and Olson, K. V.: Mapping Atmospheric Moisture Climatologies across the Conterminous United States, *PLoS ONE*, 10, e0141140, <https://doi.org/10.1371/journal.pone.0141140>, 2015.
- 765 Daly, C., Smith, J., and Halbleib, M.: 1981–2010 High-Resolution Temperature and Precipitation Maps for Alaska Final Report, 43, 2018.
- Davidson, E. A., Janssens, I. A., and Luo, Y.: On the variability of respiration in terrestrial ecosystems: moving beyond Q<sub>10</sub>, *Glob. Change Biol.*, 12, 154–164, <https://doi.org/10.1111/j.1365-2486.2005.01065.x>, 2006.
- Denfeld, B. A., Frey, K. E., Sobczak, W. V., Mann, P. J., and Holmes, R. M.: Summer CO<sub>2</sub> evasion from streams and rivers in the Kolyma River basin, north-east Siberia, *Polar Res.*, 32, 19704, <https://doi.org/10.3402/polar.v32i0.19704>, 2013.
- 770 Dietrich, W. E., Smith, J. D., and Dunne, T.: Flow and Sediment Transport in a Sand Bedded Meander, *J. Geol.*, 87, 305–315, <https://doi.org/10.1086/628419>, 1979.

- 775 Douglas, M. M., Lingappa, U. F., Lamb, M. P., Rowland, J. C., West, A. J., Li, G., Kemeny, P. C., Chadwick, A. J., Piliouras, A., Schwenk, J., and Fischer, W. W.: Impact of river channel lateral migration on microbial communities across a discontinuous permafrost floodplain, 87, *AEM*.01339-21, <https://doi.org/10.1128/AEM.01339-21>, 2021.
- Dumoulin, J. A., Harris, A. G., Blome, C. D., and Young, L. E.: Depositional Settings, Correlation, and Age of Carboniferous Rocks in the Western Brooks Range, Alaska, *Econ. Geol.*, 99, 1355–1384, <https://doi.org/10.2113/gsecongeo.99.7.1355>, 2004.
- 780 Dupeyrat, L., Costard, F., Randriamazaoro, R., Gailhardis, E., Gautier, E., and Fedorov, A.: Effects of ice content on the thermal erosion of permafrost: implications for coastal and fluvial erosion, *Permafrost Periglac.*, 22, 179–187, <https://doi.org/10.1002/ppp.722>, 2011.
- Eke, E., Parker, G., and Shimizu, Y.: Numerical modeling of erosional and depositional bank processes in migrating river bends with self-formed width: Morphodynamics of bar push and bank pull, *J. Geophys. Res.: Earth Surf.*, 119, 1455–1483, <https://doi.org/10.1002/2013JF003020>, 2014.
- 785 French, H. and Shur, Y.: The principles of cryostratigraphy, *Earth-Sci. Rev.*, 101, 190–206, <https://doi.org/10.1016/j.earscirev.2010.04.002>, 2010.
- Galy, V. and Eglinton, T.: Protracted storage of biospheric carbon in the Ganges–Brahmaputra basin, *Nat. Geosci.*, 4, 843–847, <https://doi.org/10.1038/ngeo1293>, 2011.
- 790 Galy, V., France-Lanord, C., Beyssac, O., Faure, P., Kudrass, H., and Palhol, F.: Efficient organic carbon burial in the Bengal fan sustained by the Himalayan erosional system, *Nature*, 450, 407–410, <https://doi.org/10.1038/nature06273>, 2007.
- Galy, V., Beyssac, O., France-Lanord, C., and Eglinton, T.: Recycling of Graphite During Himalayan Erosion: A Geological Stabilization of Carbon in the Crust, *Science*, 322, 943–945, <https://doi.org/10.1126/science.1161408>, 2008.
- Gee, G. W. and Or, D.: Particle-Size Analysis, in: *Methods of Soil Analysis Part 4: Physical Methods*, edited by: Dane, J. H. and Topp, G. C., Soil Science Society of America, Inc., Madison, WI, 2002.
- 795 Hemingway, J. D., Hilton, R. G., Hovius, N., Eglinton, T. I., Haghypour, N., Wacker, L., Chen, M.-C., and Galy, V. V.: Microbial oxidation of lithospheric organic carbon in rapidly eroding tropical mountain soils, *Science*, 360, 209–212, <https://doi.org/10.1126/science.aao6463>, 2018.
- 800 Hilton, R. G., Galy, V., Gaillardet, J., Dellinger, M., Bryant, C., O'Regan, M., Gröcke, D. R., Coxall, H., Bouchez, J., and Calmels, D.: Erosion of organic carbon in the Arctic as a geological carbon dioxide sink, *Nature*, 524, 84–87, <https://doi.org/10.1038/nature14653>, 2015.
- Holmes, R. M., McClelland, J. W., Peterson, B. J., Tank, S. E., Bulygina, E., Eglinton, T. I., Gordeev, V. V., Gurtovaya, T. Y., Raymond, P. A., Repeta, D. J., Staples, R., Striegl, R. G., Zhulidov, A. V., and Zimov, S. A.: Seasonal and Annual Fluxes of Nutrients and Organic Matter from Large Rivers to the Arctic Ocean and Surrounding Seas, *Estuar. Coast.*, 35, 369–382, <https://doi.org/10.1007/s12237-011-9386-6>, 2012.
- 805 Horan, K., Hilton, R. G., Dellinger, M., Tipper, E., Galy, V., Calmels, D., Selby, D., Gaillardet, J., Ottley, C. J., and Parsons, D. R.: Carbon dioxide emissions by rock organic carbon oxidation and the net geochemical carbon budget of the Mackenzie River Basin, *Am. J. Sci.*, 319, 473–499, <https://doi.org/10.2475/06.2019.02>, 2019.
- Howard, A. D. and Knutson, T. R.: Sufficient conditions for river meandering: A simulation approach, *Water Resour. Res.*, 20, 1659–1667, <https://doi.org/10.1029/WR020i011p01659>, 1984.

- 810 Hugelius, G., Strauss, J., Zubrzycki, S., Harden, J. W., Schuur, E. a. G., Ping, C.-L., Schirrmeister, L., Grosse, G., Michaelson, G. J., Koven, C. D., O'Donnell, J. A., Elberling, B., Mishra, U., Camill, P., Yu, Z., Palmtag, J., and Kuhry, P.: Estimated stocks of circumpolar permafrost carbon with quantified uncertainty ranges and identified data gaps, *Biogeosciences*, 11, 6573–6593, <https://doi.org/10.5194/bg-11-6573-2014>, 2014.
- 815 Isaksen, K., Romanovsky, V., Smith, S. L., and Drozdov, D. S.: Thermal state of permafrost across the circumpolar permafrost regions - results from the latest assessment report, the SWIPA update, in: XI International Conference on Permafrost, book of abstracts, edited by: Günther, F. and Morgenstern, A., Bibliothek Wissenschaftspark Albert Einstein, Potsdam, DE, 444–445, 2016.
- 820 Kanevskiy, M., Shur, Y., Strauss, J., Jorgenson, T., Fortier, D., Stephani, E., and Vasiliev, A.: Patterns and rates of riverbank erosion involving ice-rich permafrost (yedoma) in northern Alaska, *Geomorphology*, 253, 370–384, <https://doi.org/10.1016/j.geomorph.2015.10.023>, 2016.
- Koch, J., Ewing, S., Striegl, R., and McKnight, D.: Rapid runoff via shallow throughflow and deeper preferential flow in a boreal catchment underlain by frozen silt (Alaska, USA), *Hydrogeol. J.*, 21, <https://doi.org/10.1007/s10040-012-0934-3>, 2013.
- 825 Kokelj, S. V., Lacelle, D., Lantz, T. C., Tunnicliffe, J., Malone, L., Clark, I. D., and Chin, K. S.: Thawing of massive ground ice in mega slumps drives increases in stream sediment and solute flux across a range of watershed scales, *J. Geophys. Res.-Earth*, 118, 681–692, <https://doi.org/10.1002/jgrf.20063>, 2013.
- Lantz, T. C. and Kokelj, S. V.: Increasing rates of retrogressive thaw slump activity in the Mackenzie Delta region, N.W.T., Canada, *Geophys. Res. Lett.*, 35, <https://doi.org/10.1029/2007GL032433>, 2008.
- Lauer, J. W. and Parker, G.: Modeling framework for sediment deposition, storage, and evacuation in the floodplain of a meandering river: Theory, *Water Resour. Res.*, 44, <https://doi.org/10.1029/2006WR005528>, 2008.
- 830 Lauer, J. W. and Willenbring, J.: Steady state reach-scale theory for radioactive tracer concentration in a simple channel/floodplain system, *J. Geophys. Res.-Earth*, 115, <https://doi.org/10.1029/2009JF001480>, 2010.
- Lininger, K. B. and Wohl, E.: Floodplain dynamics in North American permafrost regions under a warming climate and implications for organic carbon stocks: A review and synthesis, *Earth-Sci. Rev.*, 193, 24–44, <https://doi.org/10.1016/j.earscirev.2019.02.024>, 2019.
- 835 Lininger, K. B., Wohl, E., and Rose, J. R.: Geomorphic controls on floodplain soil organic carbon in the Yukon Flats, interior Alaska, from reach to river basin scales, *Water Resour. Res.*, 54, 1934–1951, <https://doi.org/10.1002/2017WR022042>, 2018.
- Lininger, K. B., Wohl, E., Rose, J. R., and Leisz, S. J.: Significant Floodplain Soil Organic Carbon Storage Along a Large High-Latitude River and its Tributaries, *Geophys. Res. Lett.*, 46, 2121–2129, <https://doi.org/10.1029/2018GL080996>, 2019.
- 840 Loiko, S. V., Pokrovsky, O. S., Raudina, T. V., Lim, A., Kolesnichenko, L. G., Shirokova, L. S., Vorobyev, S. N., and Kirpotin, S. N.: Abrupt permafrost collapse enhances organic carbon, CO<sub>2</sub>, nutrient and metal release into surface waters, *Chem. Geol.*, 471, 153–165, <https://doi.org/10.1016/j.chemgeo.2017.10.002>, 2017.
- Malmon, D. V., Dunne, T., and Reneau, S. L.: Stochastic Theory of Particle Trajectories through Alluvial Valley Floors, *J. Geol.*, 111, 525–542, <https://doi.org/10.1086/376764>, 2003.
- 845 Malone, L., Lacelle, D., Kokelj, S., and Clark, I. D.: Impacts of hillslope thaw slumps on the geochemistry of permafrost catchments (Stony Creek watershed, NWT, Canada), *Chem. Geol.*, 356, 38–49, <https://doi.org/10.1016/j.chemgeo.2013.07.010>, 2013.



- Mason, J. and Mohrig, D.: Scroll bars are inner bank levees along meandering river bends, *Earth Surf. Proc. Land.*, 44, 2649–2659, <https://doi.org/10.1002/esp.4690>, 2019.
- 850 McClelland, J. W., Holmes, R. M., Peterson, B. J., Raymond, P. A., Striegl, R. G., Zhulidov, A. V., Zimov, S. A., Zimov, N., Tank, S. E., Spencer, R. G. M., Staples, R., Gurtovaya, T. Y., and Griffin, C. G.: Particulate organic carbon and nitrogen export from major Arctic rivers, *Global Biogeochem. Cy.*, 30, 629–643, <https://doi.org/10.1002/2015GB005351>, 2016.
- Miall, A. D.: *Principles of Sedimentary Basin Analysis*, Springer Science & Business Media, 633 pp., 2013.
- Nowacki, G. J., Spencer, P., Fleming, M., Brock, T., and Jorgenson, T.: *Unified Ecoregions of Alaska: 2001*, Geological Survey (U.S.), 2003.
- 855 O'Donnell, J. A., Aiken, G. R., Kane, E. S., and Jones, J. B.: Source water controls on the character and origin of dissolved organic matter in streams of the Yukon River basin, Alaska, *J. Geophys. Res.-Biogeo.*, 115, <https://doi.org/10.1029/2009JG001153>, 2010.
- 860 O'Donnell, J. A., Jorgenson, M. T., Harden, J. W., McGuire, A. D., Kanevskiy, M. Z., and Wickland, K. P.: The effects of permafrost thaw on soil hydrologic, thermal, and carbon dynamics in an Alaskan peatland, *Ecosystems*, 15, 213–229, <https://doi.org/10.1007/s10021-011-9504-0>, 2012.
- Parmentier, F.-J. W., Christensen, T. R., Rysgaard, S., Bendtsen, J., Glud, R. N., Else, B., van Huissteden, J., Sachs, T., Vonk, J. E., and Sejr, M. K.: A synthesis of the arctic terrestrial and marine carbon cycles under pressure from a dwindling cryosphere, *Ambio*, 46, 53–69, <https://doi.org/10.1007/s13280-016-0872-8>, 2017.
- 865 Pizzuto, J., Schenk, E. R., Hupp, C. R., Gellis, A., Noe, G., Williamson, E., Karwan, D. L., O'Neal, M., Marquard, J., Aalto, R., and Newbold, D.: Characteristic length scales and time-averaged transport velocities of suspended sediment in the mid-Atlantic Region, USA, *Water Resour. Res.*, 50, 790–805, <https://doi.org/10.1002/2013WR014485>, 2014.
- Potter, C., Klooster, S., and Genovese, V.: Alaska ecosystem carbon fluxes estimated from MODIS satellite data inputs from 2000 to 2010, *Carbon Balance and Management*, 8, 12, <https://doi.org/10.1186/1750-0680-8-12>, 2013.
- 870 Randriamazaoro, R., Dupeyrat, L., Costard, F., and Gailhardis, E. C.: Fluvial thermal erosion: heat balance integral method, *Earth Surf. Proc. Land.*, 32, 1828–1840, <https://doi.org/10.1002/esp.1489>, 2007.
- [Reimer, P. J., Brown, T. A., and Reimer, R. W.: Discussion: Reporting and Calibration of Post-Bomb <sup>14</sup>C Data, 46, 1299–1304, https://doi.org/10.1017/S0033822200033154, 2004.](https://doi.org/10.1017/S0033822200033154)
- 875 Repasch, M., Wittmann, H., Scheingross, J. S., Sachse, D., Szupiany, R., Orfeo, O., Fuchs, M., and Hovius, N.: Sediment Transit Time and Floodplain Storage Dynamics in Alluvial Rivers Revealed by Meteoric <sup>10</sup>Be, *J. Geophys. Res.-Earth*, 125, e2019JF005419, <https://doi.org/10.1029/2019JF005419>, 2020.
- Romanovsky, V. E., Smith, S. L., and Christiansen, H. H.: Permafrost thermal state in the polar Northern Hemisphere during the international polar year 2007–2009: a synthesis, *Permafrost Periglac.*, 21, 106–116, <https://doi.org/10.1002/ppp.689>, 2010.
- Rowland, J., Stauffer, S., and Schwenk, J.: Pan-arctic river bank erosion and accretion, and planform metrics measured over intervals ranging from 1973 to 2016, *ESS-DIVE [data set]*, <https://doi.org/10.15485/1571527>, 2019.
- 880 Scheingross, J. S., Repasch, M. N., Hovius, N., Sachse, D., Lupker, M., Fuchs, M., Halevy, I., Grücke, D. R., Golombek, N. Y., Haghypour, N., Eglinton, T. I., Orfeo, O., and Schleicher, A. M.: The fate of fluvially-deposited organic carbon during transient floodplain storage, *Earth Planet. Sc. Lett.*, 561, 116822, <https://doi.org/10.1016/j.epsl.2021.116822>, 2021.

- Schreiner, K. M., Bianchi, T. S., and Rosenheim, B. E.: Evidence for permafrost thaw and transport from an Alaskan North Slope watershed, *Geophys. Res. Lett.*, 41, 3117–3126, <https://doi.org/10.1002/2014GL059514>, 2014.
- 885 Schuur, E. a. G., McGuire, A. D., Schädel, C., Grosse, G., Harden, J. W., Hayes, D. J., Hugelius, G., Koven, C. D., Kuhry, P., Lawrence, D. M., Natali, S. M., Olefeldt, D., Romanovsky, V. E., Schaefer, K., Turetsky, M. R., Treat, C. C., and Vonk, J. E.: Climate change and the permafrost carbon feedback, *Nature*, 520, 171–179, <https://doi.org/10.1038/nature14338>, 2015.
- Serikova, S., Pokrovsky, O. S., Ala-Aho, P., Kazantsev, V., Kirpotin, S. N., Kopysov, S. G., Krickov, I. V., Laudon, H., Manasypov, R. M., Shirokova, L. S., Soulsby, C., Tetzlaff, D., and Karlsson, J.: High riverine CO<sub>2</sub> emissions at the permafrost boundary of Western Siberia, *Nat. Geosci.*, 11, 825–829, <https://doi.org/10.1038/s41561-018-0218-1>, 2018.
- 890 Shakil, S., Tank, S. E., Kokelj, S. V., Vonk, J. E., and Zolkos, S.: Particulate dominance of organic carbon mobilization from thaw slumps on the Peel Plateau, NT: Quantification and implications for stream systems and permafrost carbon release, *Environ. Res. Lett.*, 15, 114019, <https://doi.org/10.1088/1748-9326/abac36>, 2020.
- Shur, Y. L. and Jorgenson, M. T.: Patterns of permafrost formation and degradation in relation to climate and ecosystems, *Permafrost Periglac.*, 18, 7–19, <https://doi.org/10.1002/ppp.582>, 2007.
- 895 Slack, J. F., Selby, D., and Dumoulin, J. A.: Hydrothermal, Biogenic, and Seawater Components in Metalliferous Black Shales of the Brooks Range, Alaska: Syndimentary Metal Enrichment in a Carbonate Ramp Setting, *Econ. Geol.*, 110, 653–675, <https://doi.org/10.2113/econgeo.110.3.653>, 2015.
- Spencer, R. G., Mann, P. J., Dittmar, T., Eglinton, T. I., McIntyre, C., Holmes, R. M., Zimov, N., and Stubbins, A.: Detecting the signature of permafrost thaw in Arctic rivers, *Geophys. Res. Lett.*, 42, 2830–2835, <https://doi.org/10.1002/2015GL063498>, 2015.
- 900 Striegl, R. G., Dornblaser, M. M., McDonald, C. P., Rover, J. R., and Stets, E. G.: Carbon dioxide and methane emissions from the Yukon River system, *Global Biogeochem. Cy.*, 26, <https://doi.org/10.1029/2012GB004306>, 2012.
- Sylvester, Z., Durkin, P., and Covault, J. A.: High curvatures drive river meandering, *Geology*, 47, 263–266, <https://doi.org/10.1130/G45608.1>, 2019.
- 905 Toohey, R. C., Herman-Mercer, N. M., Schuster, P. F., Mutter, E. A., and Koch, J. C.: Multidecadal increases in the Yukon River Basin of chemical fluxes as indicators of changing flowpaths, groundwater, and permafrost, *Geophys. Res. Lett.*, 43, 12,120-12,130, <https://doi.org/10.1002/2016GL070817>, 2016.
- Torres, M. A., Limaye, A. B., Ganti, V., Lamb, M. P., West, A. J., and Fischer, W. W.: Model predictions of long-lived storage of organic carbon in river deposits, *Earth Surf. Dynam.*, 5, 711–730, <https://doi.org/10.5194/esurf-5-711-2017>, 2017.
- 915 Torres, M. A., Kemeny, P. C., Lamb, M. P., Cole, T. L., and Fischer, W. W.: Long-Term Storage and Age-Biased Export of Fluvial Organic Carbon: Field Evidence From West Iceland, *Geochem. Geophys. Geosy.*, 21, e2019GC008632, <https://doi.org/10.1029/2019GC008632>, 2020.
- Turetsky, M. R., Abbott, B. W., Jones, M. C., Anthony, K. W., Olefeldt, D., Schuur, E. A., Grosse, G., Kuhry, P., Hugelius, G., and Koven, C.: Carbon release through abrupt permafrost thaw, *Nat. Geosci.*, 13, 138–143, <https://doi.org/10.1038/s41561-019-0526-0>, 2020.
- 915 Vonk, J. E., Tank, S. E., and Walvoord, M. A.: Integrating hydrology and biogeochemistry across frozen landscapes, *Nat. Commun.*, 10, 1–4, <https://doi.org/10.1038/s41467-019-13361-5>, 2019.

Walvoord, M. A. and Kurylyk, B. L.: Hydrologic Impacts of Thawing Permafrost—A Review, *Vadose Zone J.*, 15,  
920 <https://doi.org/10.2136/vzj2016.01.0010>, 2016.

Wang, J., Hilton, R. G., Jin, Z., Zhang, F., Densmore, A. L., Gröcke, D. R., Xu, X., Li, G., and West, A. J.: The isotopic composition and fluxes of particulate organic carbon exported from the eastern margin of the Tibetan Plateau, *Geochim. Cosmochim. Ac.*, 252, 1–15, <https://doi.org/10.1016/j.gca.2019.02.031>, 2019.

White, K. D. and Eames, H. J.: CRREL Ice Jam Database [data set], Cold Regions Research and Engineering Lab Hanover,  
925 NH, 1999.

Wilson, F. H., Hults, C. P., Mull, C. G., and Karl, S. M.: Geologic map of Alaska, Geologic map of Alaska, U.S. Geological Survey, Reston, VA, <https://doi.org/10.3133/sim3340>, 2015.

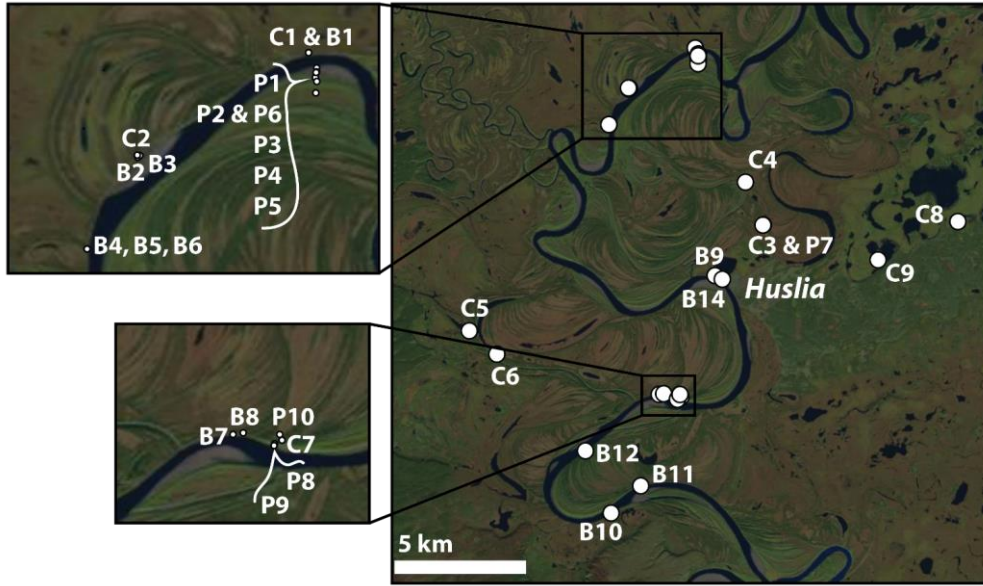

930

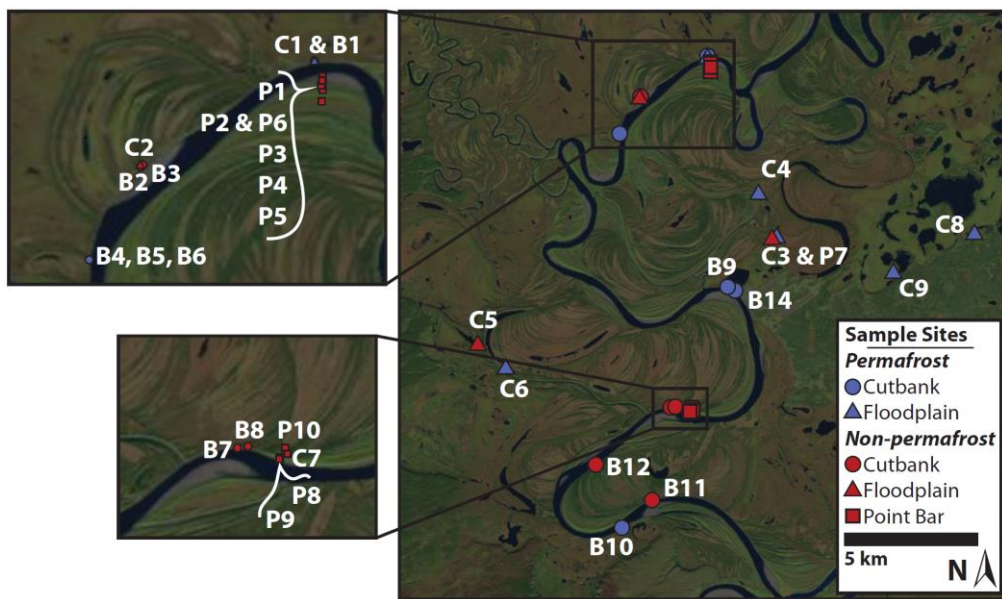

Fig. S1: Sample locations. Georeferenced Landsat imagery with labelled sampling locations; C = core, B = bank, P = pit samples.

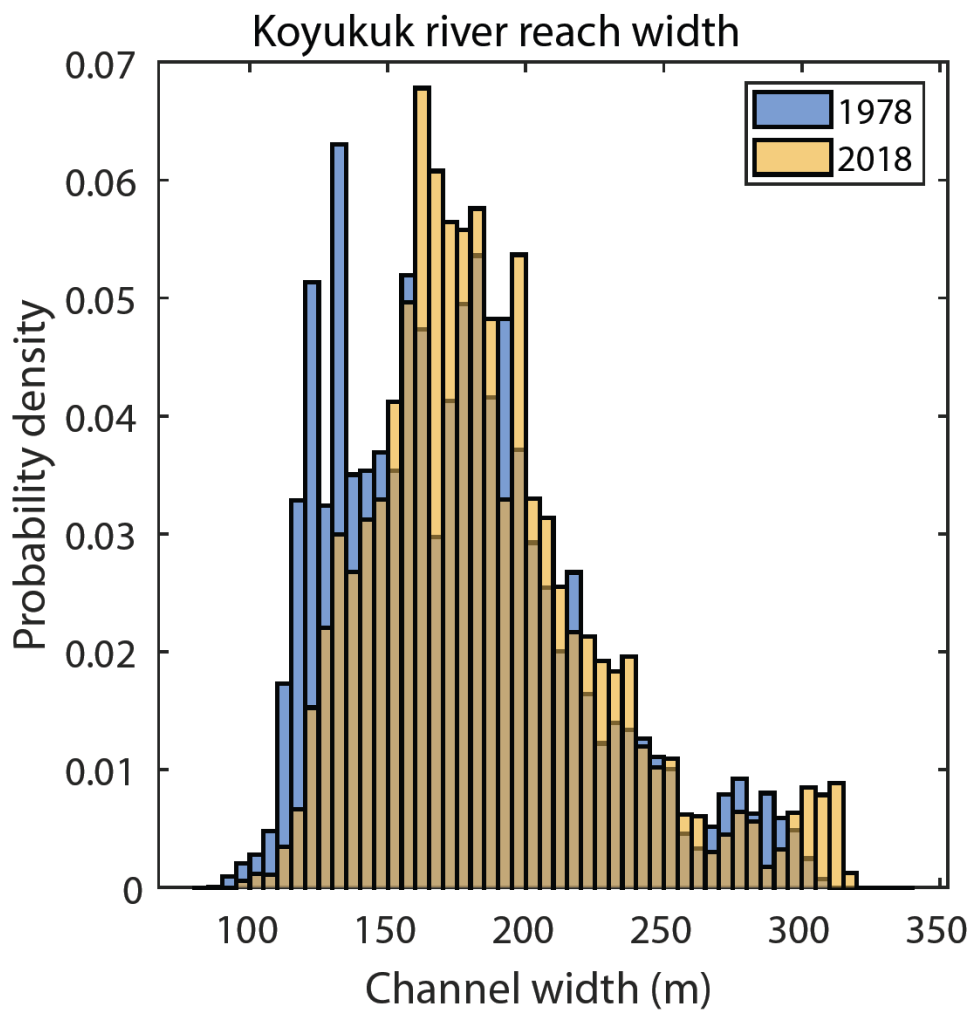

935 Fig. S2: Koyukuk River width. Probability distribution of width of channel masks generated from Landsat 30 m imagery, with widths calculated at each pixel along the channel centerline for the reach of the Koyukuk River pictured in Fig. S1 (Rowland et al., 2019). The reach maintained a roughly constant channel width over the Landsat record, from  $173 \pm 43$  m (median  $\pm$  1SD) in 1978 to  $179 \pm 42$  m in 2018, supporting our assumption that cutbank erosion and point bar deposition occur at the same rate.

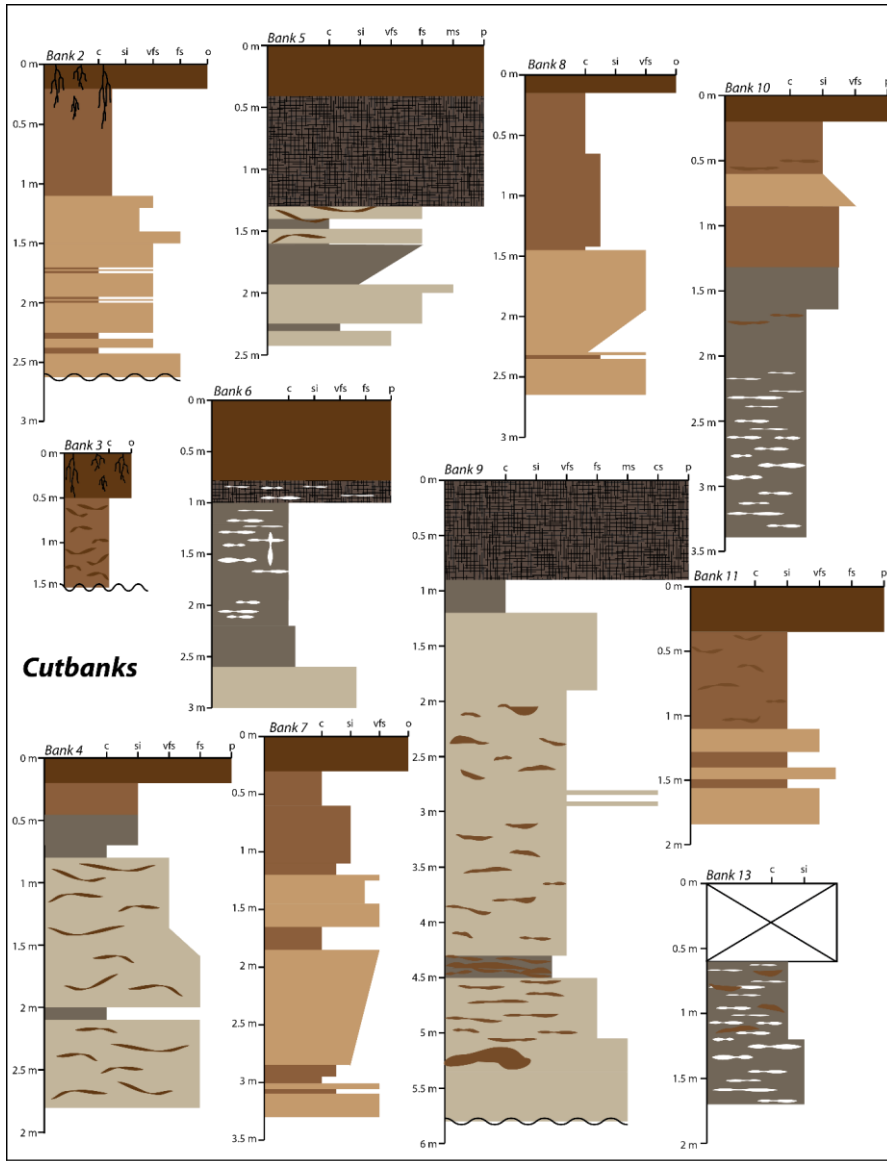

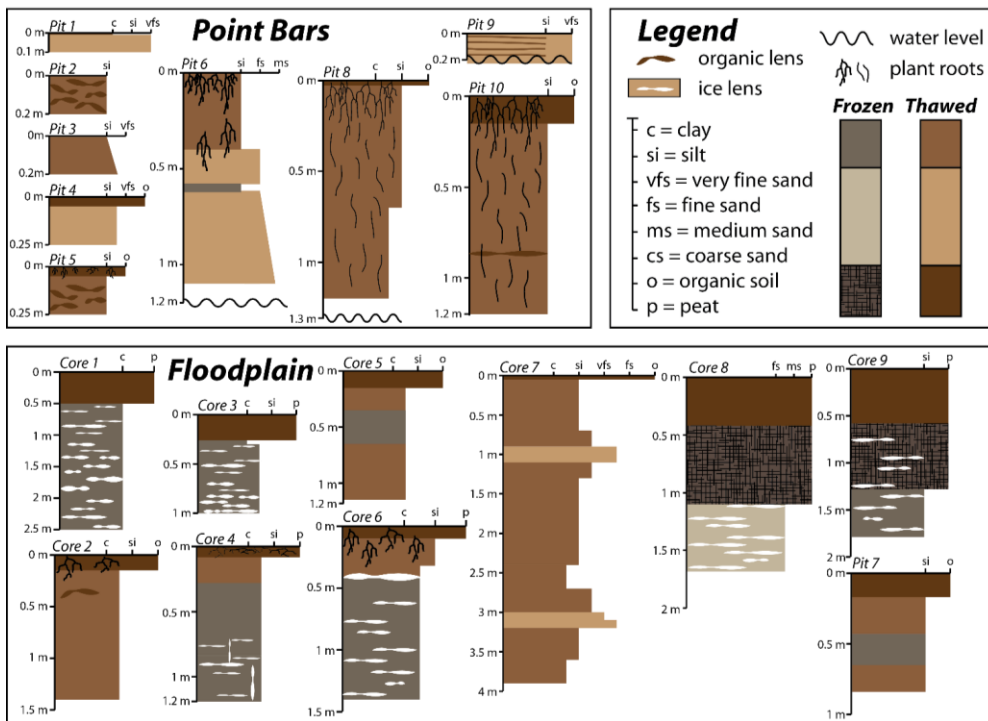

940

Fig. S3: Measured stratigraphic sections grouped by location on river floodplain. The river channel is eroding its cutbanks and depositing sediment on its point bars, which accrete to form the floodplain as the channel continues to migrate laterally. Note that deposits were generally sandy greater than 2 m depth below the floodplain surface, and that organic horizon thickness at the ground surface varies, though lenses of organic-rich sediment were prevalent meters below the surface. The active layer was shallower in permafrost units containing thick layers of peat, while locations without permafrost contained plant roots extending meters farther below the ground surface and lacked thermoerosional niches. Thicknesses of stratigraphic units were tabulated for each section in Table S4.

945



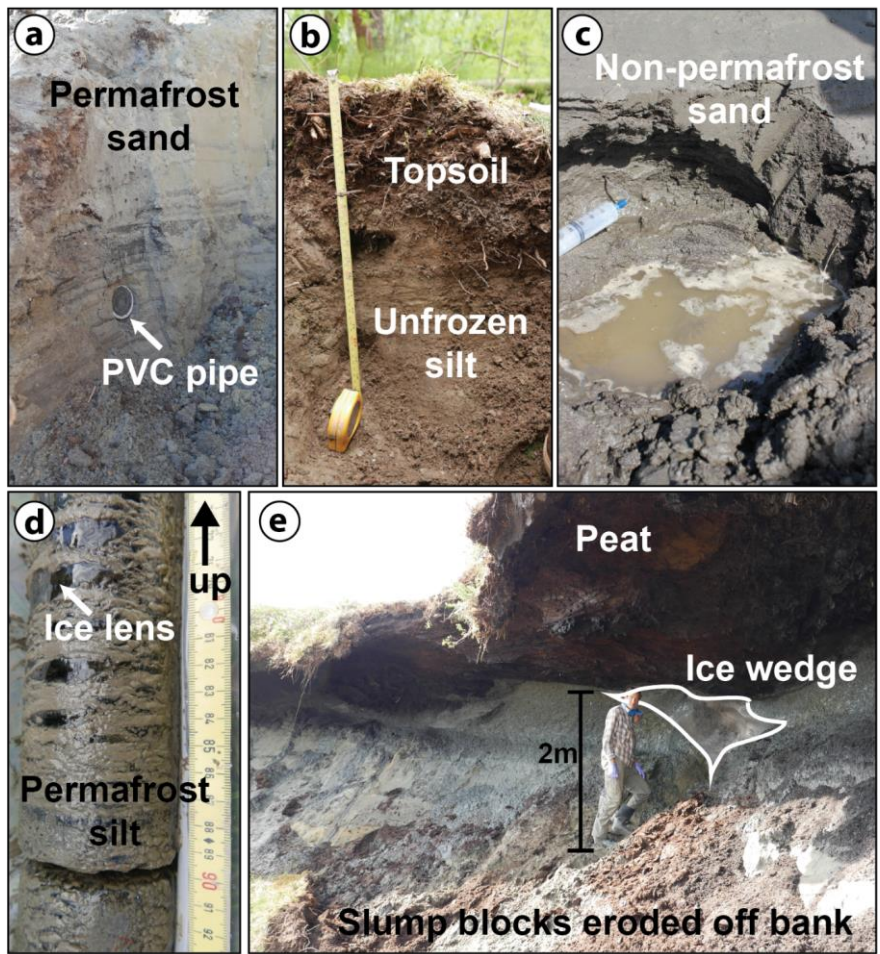

Fig. S4: Field photos of floodplain stratigraphic facies. (a) Permafrost sand in Bank 9 with 2 inch PVC pipe (outer diameter is 6.0 cm) installed in the bank for scale. (b) Pit dug in non-permafrost ground with root-rich topsoil overlying silt at Core 5. (c) Non-permafrost sandy deposits on a point bar beach at Pit 9. (d) Permafrost silt containing ice lenses in Core 4. (e) Overhung cutbank from Bank 9, with a layer of peat overlying an ice wedge surrounded by grey, frozen silt with slump blocks and intraclasts of thawed peat and silt forming a slope that shields the bank.

950

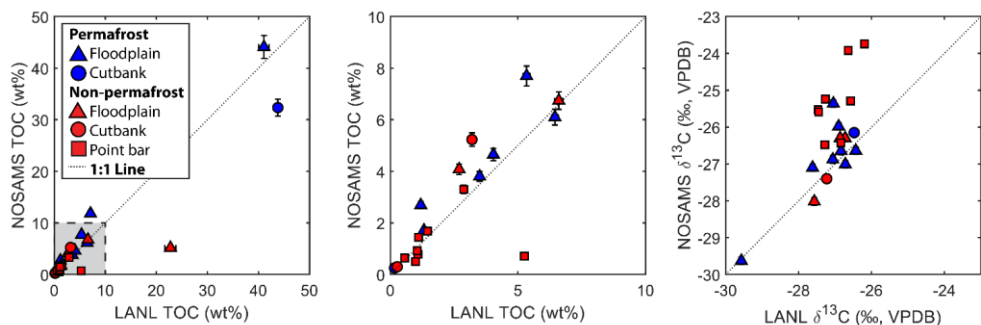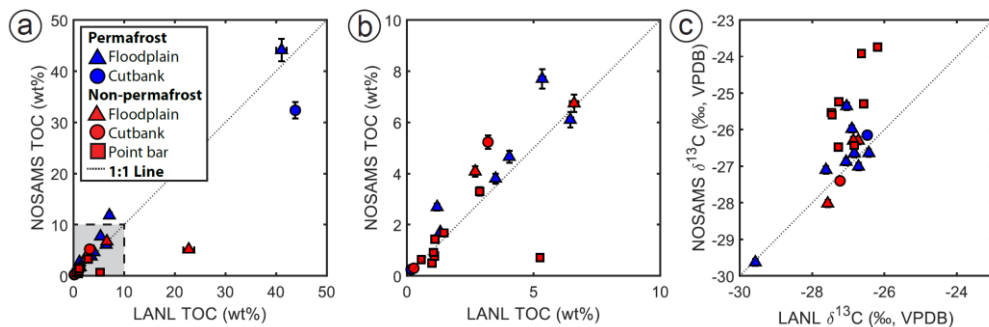

955 Fig. S5: Organic carbon measurement comparison, with samples with  $^{13}\text{C}$  values  $> -20\%$  excluded. TOC and OC stable isotopes were measured at both NOSAMS and Los Alamos National Lab (LANL), with NOSAMS generally showing a slightly higher TOC and  $\delta^{13}\text{C}$ . We attribute these differences to decarbonation procedures (see Materials and methods): using HCl in solution for the NOSAMS measurements and fumigation with HCl for the LANL measurements (see Sect. 3). All plots in the main text and 960 supplemental materials use the LANL TOC and  $\delta^{13}\text{C}$  values with NOSAMS radiocarbon measurements. (a) NOSAMS versus LANL TOC measurements, with error bars showing 1SD analytical uncertainty. (b) Zoomed in plot of shaded region in plot (a). (c) NOSAMS versus LANL OC stable isotope measurements, reported as per mille (‰) relative to VPDB with error bars showing 1SD analytical uncertainty.

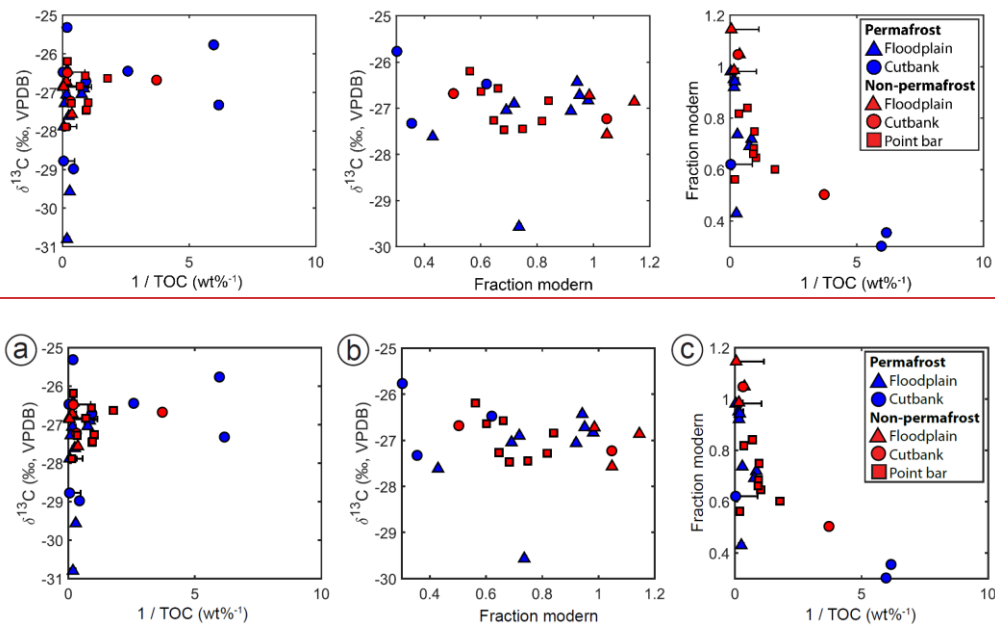

965 Fig. S6: Sediment OC characteristics, with samples with  $^{13}\text{C}$  values  $> -20\text{‰}$  excluded. Stable organic carbon isotopes displayed no trends with (a) inverse total organic carbon (TOC) or (b) radiocarbon fraction modern (Fm). Sediment  $\delta^{13}\text{C}$  values spanned the range previously reported in peat and woody debris (from  $-23.2 \pm 0.2\text{‰}$  to  $-28.6 \pm 0.2\text{‰}$ ) on the Koyukuk River floodplain near its confluence with the Yukon River (O'Donnell et al., 2012). Stable organic carbon isotope values also incorporated a petrogenic end-member, and kerogen-rich sedimentary rocks in the Brooks Range had  $\delta^{13}\text{C}$  ranging from  $-27.23 \pm 0.1\text{‰}$  to  $-30.75 \pm 0.1\text{‰}$  (Johnson et al., 2015). Measured  $\delta^{13}\text{C}$  values are reported in units of per mille (‰) relative to the VPDB, with x and y error bars showing (c) Fm decreased for high values of 1/TOC but spanned a wide range for low values of 1/TOC, which we interpret as reflecting mixing between modern biospheric, aged biospheric, and petrogenic end-members. Sample x and y error bars show 1SD analytical uncertainty.

970

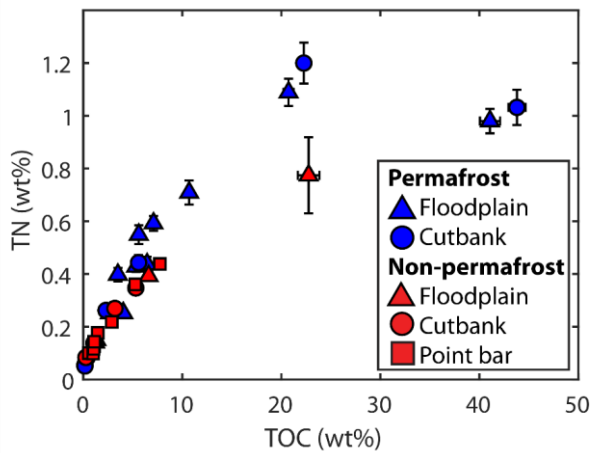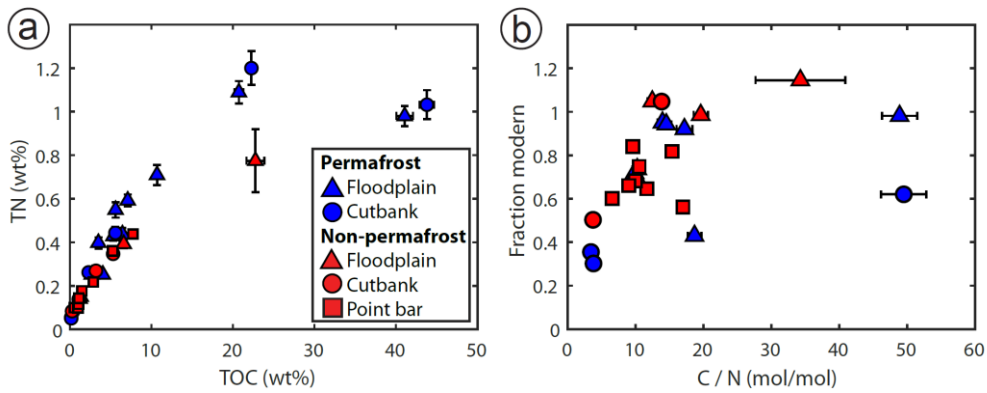

Fig. S7: Sediment total nitrogen. (a) Total nitrogen (TN) versus total organic carbon (TOC) measured as dry weight % of samples, with error bars showing 1SD analytical uncertainty. (b) Radiocarbon fraction modern values versus molar ratio of organic carbon to nitrogen, with error bars showing 1SD analytical uncertainty.

**Table S1: Sample site locations and characteristics.**

| Sample site | Landform   | Latitude (°) | Longitude (°) | Frozen ground type |
|-------------|------------|--------------|---------------|--------------------|
| Bank 1      | Cutbank    | 65.78014     | -156.43661    | Permafrost         |
| Bank 2      | Cutbank    | 65.76493     | -156.49031    | Non-permafrost     |
| Bank 3      | Cutbank    | 65.76519     | -156.48964    | Non-permafrost     |
| Bank 4      | Cutbank    | 65.75232     | -156.50511    | Permafrost         |
| Bank 5      | Cutbank    | 65.75232     | -156.50511    | Permafrost         |
| Bank 6      | Cutbank    | 65.75232     | -156.50511    | Permafrost         |
| Bank 7      | Cutbank    | 65.66093     | -156.45087    | Non-permafrost     |
| Bank 8      | Cutbank    | 65.66126     | -156.44711    | Non-permafrost     |
| Bank 9      | Cutbank    | 65.70265     | -156.40977    | Permafrost         |
| Bank 10     | Cutbank    | 65.61942     | -156.48534    | Permafrost         |
| Bank 11     | Cutbank    | 65.62931     | -156.46198    | Non-permafrost     |
| Bank 12     | Cutbank    | 65.64022     | -156.50949    | Non-permafrost     |
| Bank 13     | Cutbank    | 65.87132     | -156.26283    | Permafrost         |
| Bank 14     | Cutbank    | 65.70153     | -156.40353    | Permafrost         |
| Core 1      | Floodplain | 65.78014     | -156.43661    | Permafrost         |
| Core 2      | Floodplain | 65.76521     | -156.49049    | Non-permafrost     |
| Core 3      | Floodplain | 65.72090     | -156.37178    | Permafrost         |
| Core 4      | Floodplain | 65.73519     | -156.38866    | Permafrost         |
| Core 5      | Floodplain | 65.67904     | -156.61163    | Non-permafrost     |
| Core 6      | Floodplain | 65.67158     | -156.58762    | Permafrost         |
| Core 7      | Point bar  | 65.66046     | -156.43256    | Non-permafrost     |
| Core 8      | Floodplain | 65.72552     | -156.20992    | Permafrost         |
| Core 9      | Floodplain | 65.71100     | -156.27473    | Permafrost         |
| Pit 1       | Point bar  | 65.77817     | -156.43370    | Non-permafrost     |
| Pit 2       | Point bar  | 65.77764     | -156.43364    | Non-permafrost     |
| Pit 3       | Point bar  | 65.77688     | -156.43394    | Non-permafrost     |
| Pit 4       | Point bar  | 65.77636     | -156.43342    | Non-permafrost     |
| Pit 5       | Point bar  | 65.77483     | -156.43354    | Non-permafrost     |
| Pit 6       | Point bar  | 65.77756     | -156.43381    | Non-permafrost     |
| Pit 7       | Floodplain | 65.72083     | -156.37217    | Non-permafrost     |
| Pit 8       | Point bar  | 65.65986     | -156.43524    | Non-permafrost     |

|        |           |          |            |                |
|--------|-----------|----------|------------|----------------|
| Pit 9  | Point bar | 65.65958 | -156.43542 | Non-permafrost |
| Pit 10 | Point bar | 65.66132 | -156.43354 | Non-permafrost |

**Table S2: Sample descriptions and results of laboratory analysis. Starred samples have median grain size ( $D_{50}$ ), TOC, TN,  $\delta^{13}\text{C}$  and molar TOC/TN ratios previously reported in Douglas et al. (2021).**

985 Attached as file [TableS2.txtcsv](#)

**Table S3: Averaged sediment TOC concentrations and constants used in calculations of bank TOC content integrated to channel depth.**

|                                                       | Sand               | Silt               | Peat               | Topsoil            |
|-------------------------------------------------------|--------------------|--------------------|--------------------|--------------------|
| <b><math>D_{50}</math> (mm)</b>                       | >0.063             | <0.063             | N/A                | N/A                |
| <b>Water content (wt%)</b>                            | 18.1±6.1           | 46.6±15.6          | 87.5±7.4           | 62.2±1.0           |
| <b>TOC (wt%)</b>                                      | 0.94±0.95          | 3.69±2.25          | 35.20±12.60        | 15.25±10.62        |
| <b>TOC (kgC/m<sup>3</sup>)</b>                        | 7.49±8.27          | 19.1±14.4          | 42.7±20.0          | 55.9±42.2          |
| <b><i>TOC<sub>petro</sub> (wt%)</i></b>               | <i>0.108±0.045</i> | <i>0.108±0.045</i> | <i>0.108±0.045</i> | <i>0.108±0.045</i> |
| <b><i>TOC<sub>petro</sub> (kgC/m<sup>3</sup>)</i></b> | <i>0.86±0.52</i>   | <i>0.56±0.34</i>   | <i>0.13±0.07</i>   | <i>0.40±0.20</i>   |
| <b><i>TOC<sub>bio</sub> (wt%)</i></b>                 | <i>0.83±0.95</i>   | <i>3.58±2.25</i>   | <i>35.09±12.60</i> | <i>15.14±10.62</i> |
| <b><i>TOC<sub>bio</sub> (kgC/m<sup>3</sup>)</i></b>   | <i>6.63±8.13</i>   | <i>18.57±14.29</i> | <i>42.55±20.00</i> | <i>55.52±42.18</i> |
| <b>Bulk density (kg/m<sup>3</sup>)</b>                | 971±283            |                    |                    |                    |
| <b>Channel Depth (m)</b>                              | 12.4               |                    |                    |                    |
| <b>Migration Rate (m/yr)</b>                          | 0.52               |                    |                    |                    |

990 **Table S4: Calculation of bank TOC, biospheric, and petrogenic components content integrated to channel depth based on measured stratigraphic columns. Note that unmeasured section was assumed to consist of sand based on field observations.**

Attached as file [TableS4.txtcsv](#)

**Table S5: Complete grain size distributions measured using laser diffraction tabulated in log-normal bins, with 10<sup>th</sup>-, 50<sup>th</sup>- and 90<sup>th</sup>-percentile grain size reported as  $D_{10}$ ,  $D_{50}$ , and  $D_{90}$ .**

995 Attached as file [TableS5.txtcsv](#)

**~~Table S6: Linear mixing calculations of fraction modern of biospheric OC and fraction of biospheric OC produced *in situ* (as opposed to being deposited in association with the sediment by the river). End members for transported OC (Fm of oldest woody debris from a cutbank) and *in situ* produced OC (youngest topsoil  $Fm_{bio}$ ) are italicized.~~**

| <del>Sample Name</del> | <del>Sample Type</del> | <del>Biospheric fraction modern (<math>Fm_{bio}</math>)</del> | <del>Fraction <i>in situ</i> biomass (<math>f_{bio,ts}</math>)</del> |
|------------------------|------------------------|---------------------------------------------------------------|----------------------------------------------------------------------|
|                        |                        |                                                               |                                                                      |

|                      |                             |                       |               |
|----------------------|-----------------------------|-----------------------|---------------|
| KY18-Bank2-10        | Cutbank-sediment            | 1.0837±0.0330         | 0.9272±0.0825 |
| KY18-Bank2-230       | Cutbank-sediment            | 0.8398±0.1015         | 0.6617±0.0906 |
| KY18-Bank9-Peat      | Cutbank-sediment            | 0.6217±0.0173         | 0.4243±0.0355 |
| KY18-Bank9-220       | Cutbank-sediment            | 1.0631±0.1776         | 0.9047±0.1890 |
| KY18-Bank9-350       | Cutbank-sediment            | 0.8509±0.1396         | 0.6737±0.1158 |
| KY18-Core1-22-28     | Floodplain-sediment         | 0.9359±0.0265         | 0.7662±0.0662 |
| KY18-Core1-105-111   | Floodplain-sediment         | 0.7593±0.0228         | 0.5740±0.0489 |
| KY18-Core2-10-12     | Floodplain-sediment         | 1.0916±0.0413         | 0.9357±0.0870 |
| KY18-Core2-35-37     | Floodplain-sediment         | 1.0018±0.0354         | 0.8380±0.0755 |
| KY18-Core3-15-20     | Floodplain-sediment         | 0.9653±0.0340         | 0.7983±0.0714 |
| KY18-Core3-84-89     | Floodplain-sediment         | 0.7899±0.0380         | 0.6074±0.0554 |
| KY18-Core4-16-20     | Floodplain-sediment         | 0.9616±0.0342         | 0.7942±0.0711 |
| KY18-Core4-105-110   | Floodplain-sediment         | 0.7521±0.0347         | 0.5662±0.0508 |
| <i>KY18-Core5-15</i> | <i>Floodplain-sediment</i>  | <i>1.1507±0.0781</i>  | -             |
| KY18-Core7-85-95     | Point-bar-sediment          | 0.7440±0.0551         | 0.5574±0.0563 |
| KY18-Core7-390-400   | Point-bar-sediment          | 0.5736±0.0205         | 0.3719±0.0314 |
| KY18-Core9-33-38     | Floodplain-sediment         | 0.9837±0.0344         | 0.8183±0.0733 |
| KY18-Core9-169-174   | Floodplain-sediment         | 0.4409±0.0160         | 0.2275±0.0190 |
| KY18-Pit1-5          | Point-bar-sediment          | 0.7253±0.0383         | 0.5371±0.0491 |
| KY18-Pit2-10         | Point-bar-sediment          | 0.8494±0.0319         | 0.6721±0.0595 |
| KY18-Pit4-20         | Point-bar-sediment          | 0.7588±0.0382         | 0.5735±0.0524 |
| KY18-Pit5-20         | Point-bar-sediment          | 0.9077±0.0401         | 0.7356±0.0679 |
| KY18-Pit6-60         | Point-bar-sediment          | 0.8343±0.0426         | 0.6556±0.0614 |
| KY18-Pit8-40         | Point-bar-sediment          | 0.7323±0.0365         | 0.5446±0.0493 |
| <i>KY18-Bank14</i>   | <i>Cutbank-woody-debris</i> | <i>0.2319±0.00152</i> | -             |
