# Supplementary figures and images for: Organic carbon burial by river meandering partially offsets bank-erosion carbon fluxes in a discontinuous permafrost floodplain
Source: Copernicus journal article supplement (doi:10.5194/esurf-2021-80), 2021-11-03

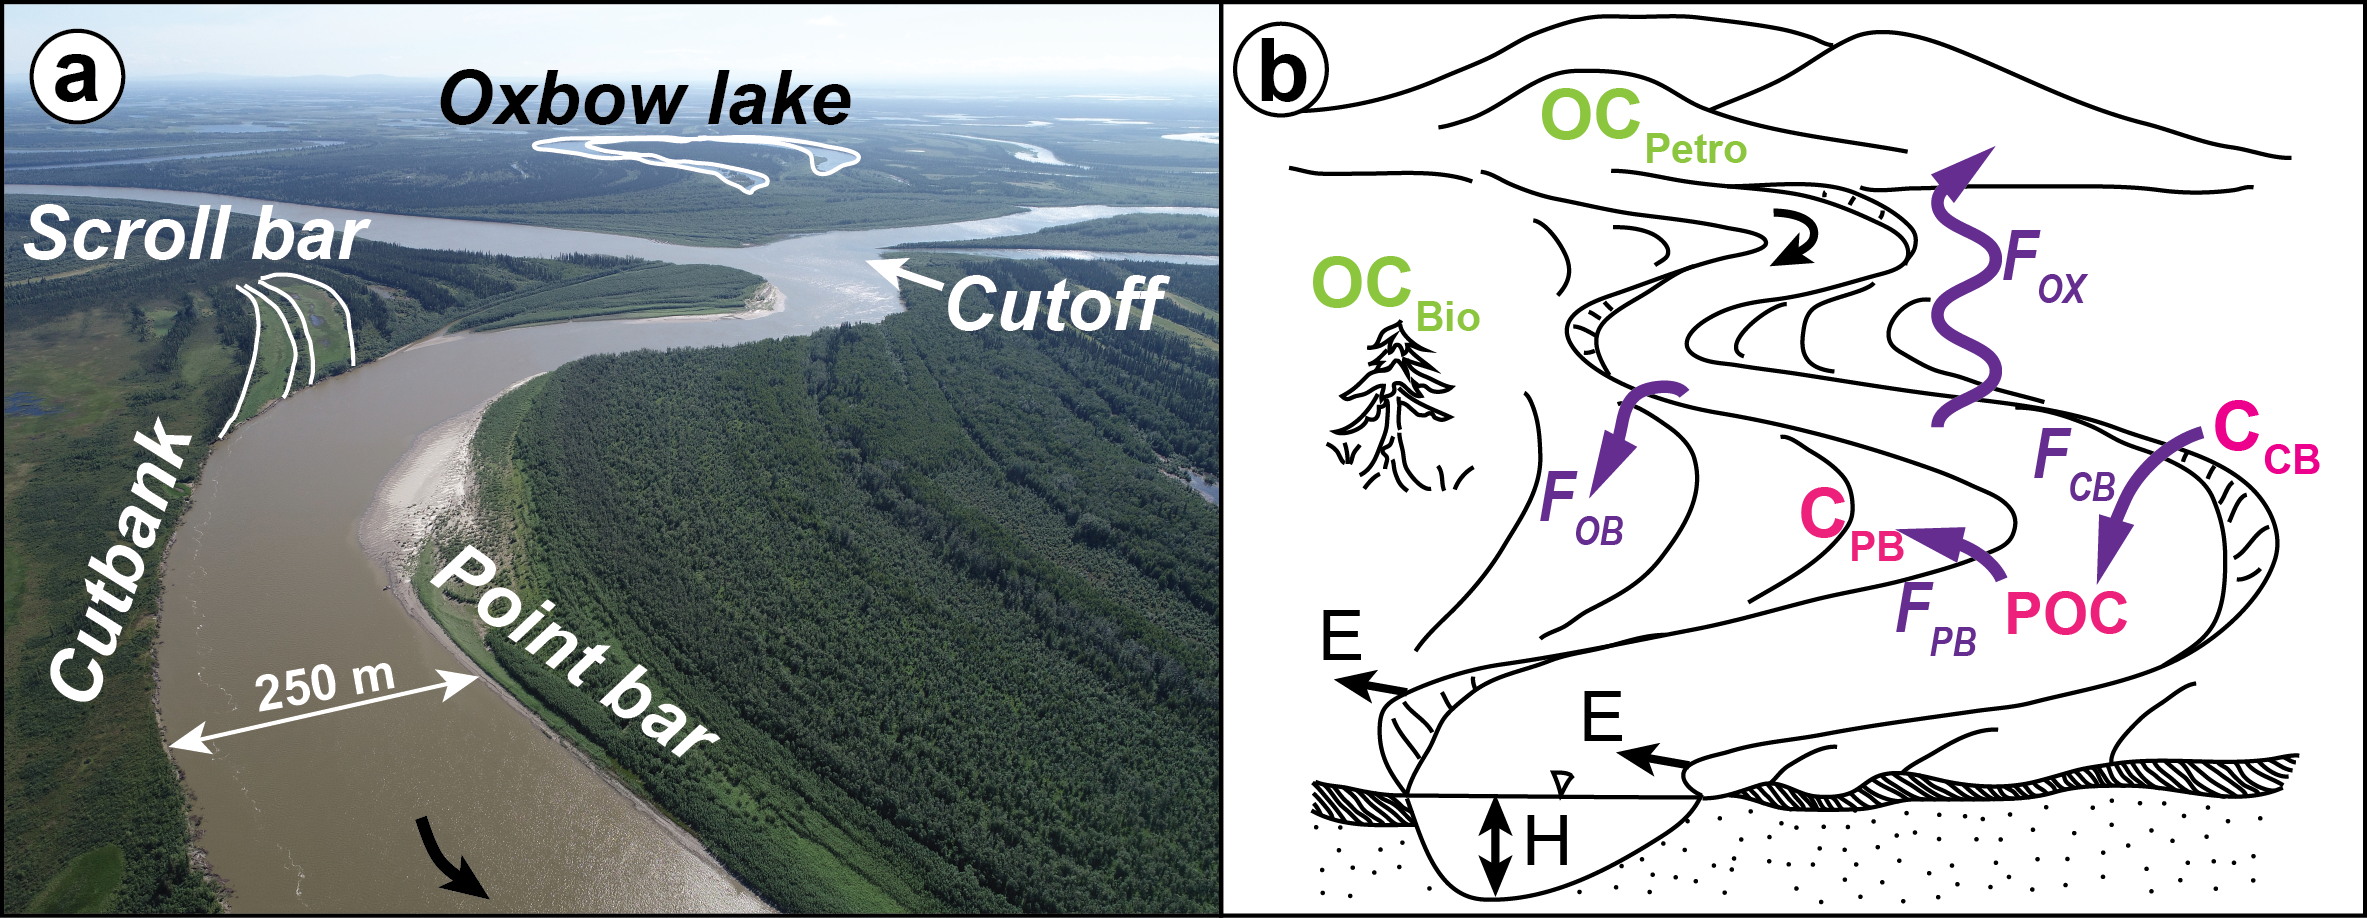

Supplement: Supplementary file 1 [file esurf-2021-80-supplement.zip › Fig1.png]

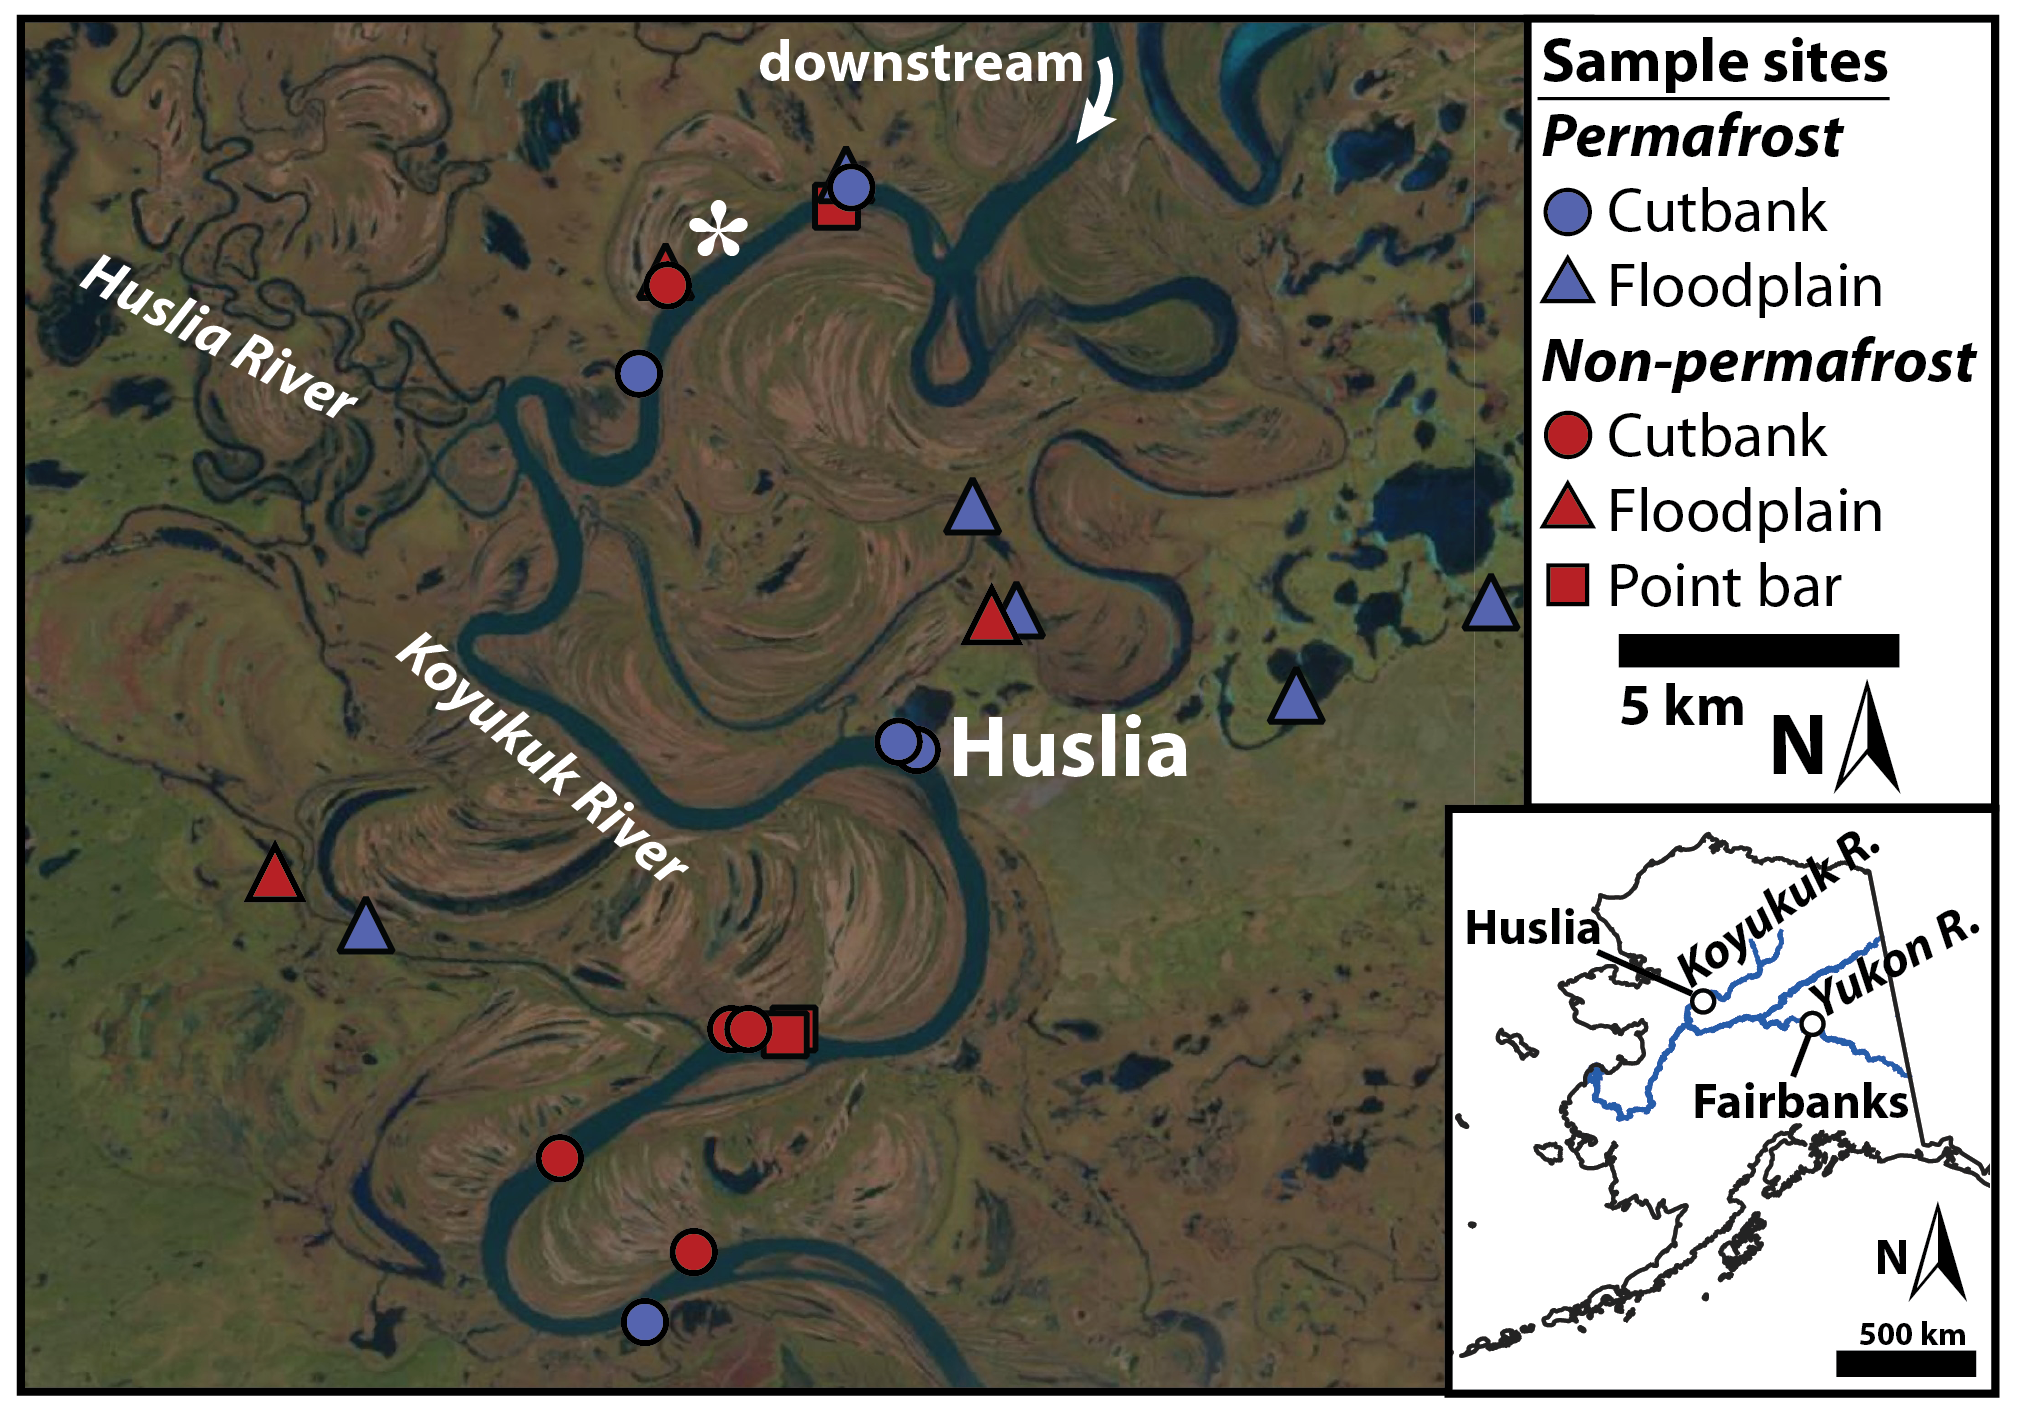

Supplement: Supplementary file 1 [file esurf-2021-80-supplement.zip › Fig2.png]

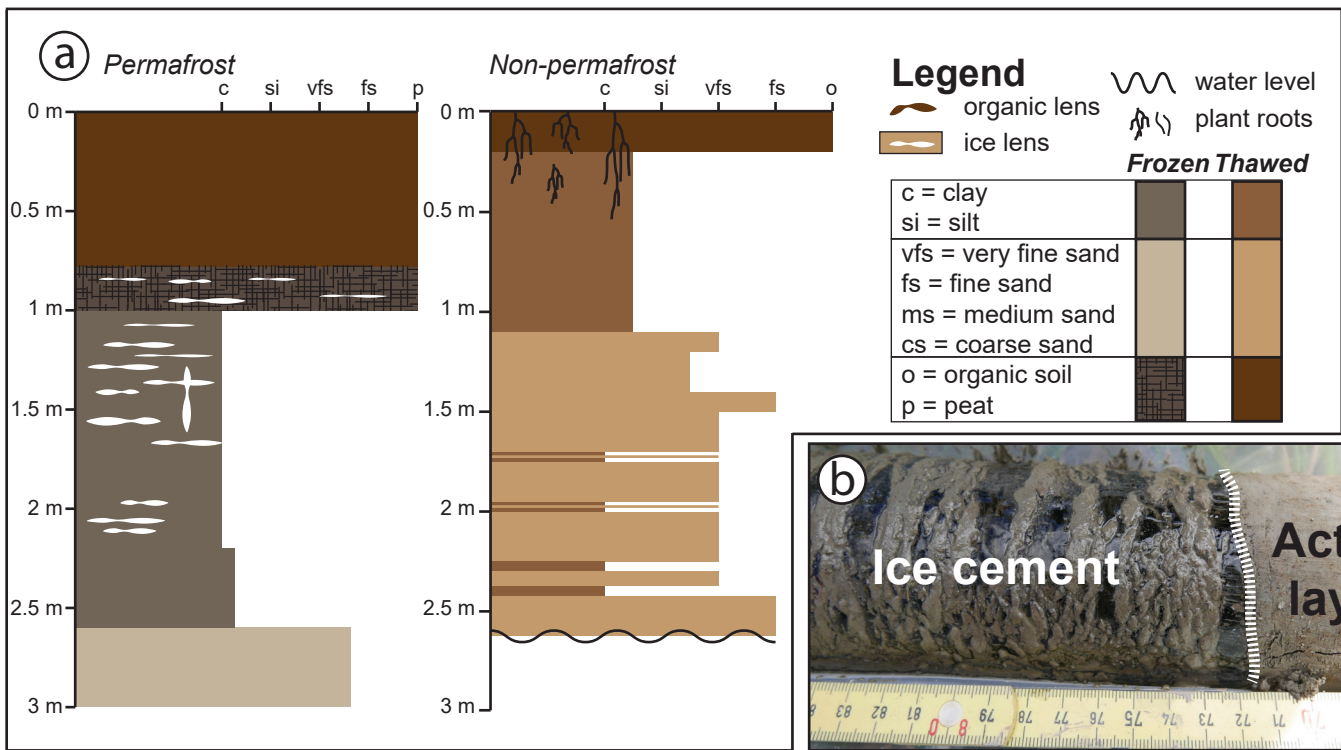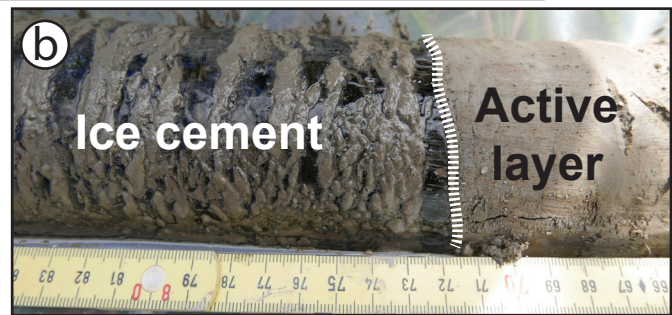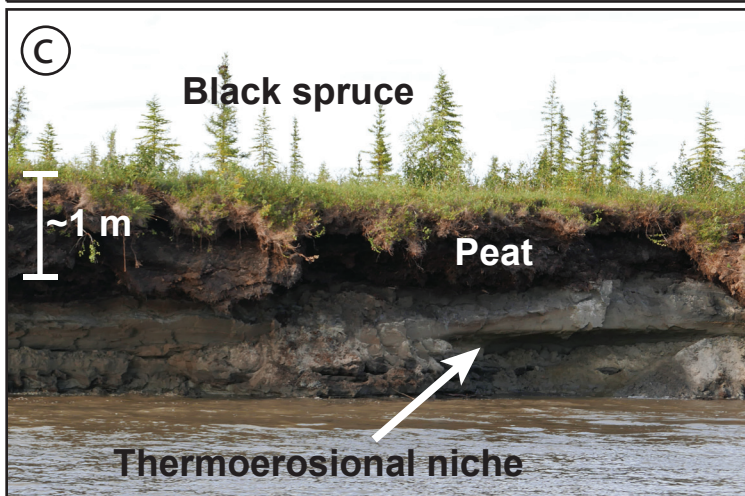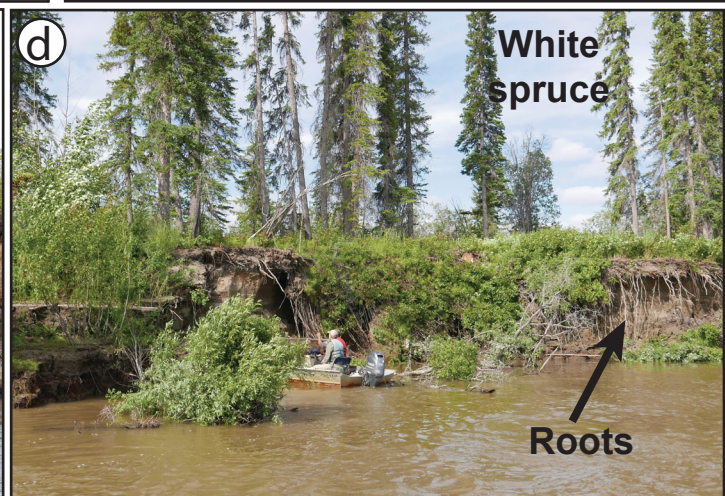

Supplement: Supplementary file 1 [file esurf-2021-80-supplement.zip › Fig3.pdf]

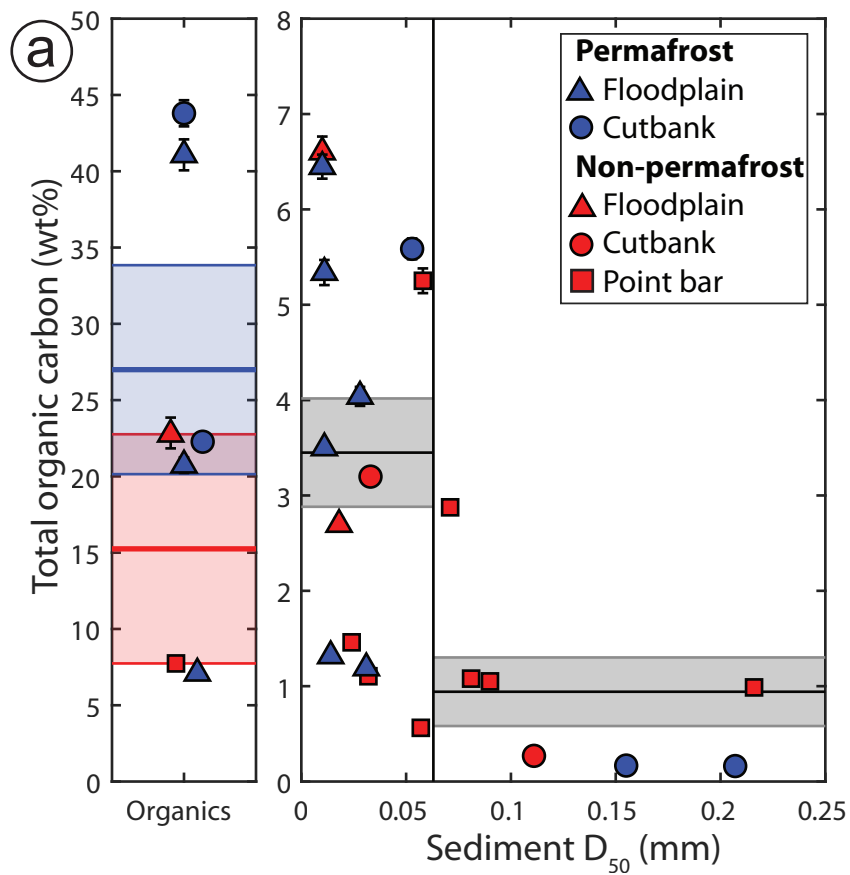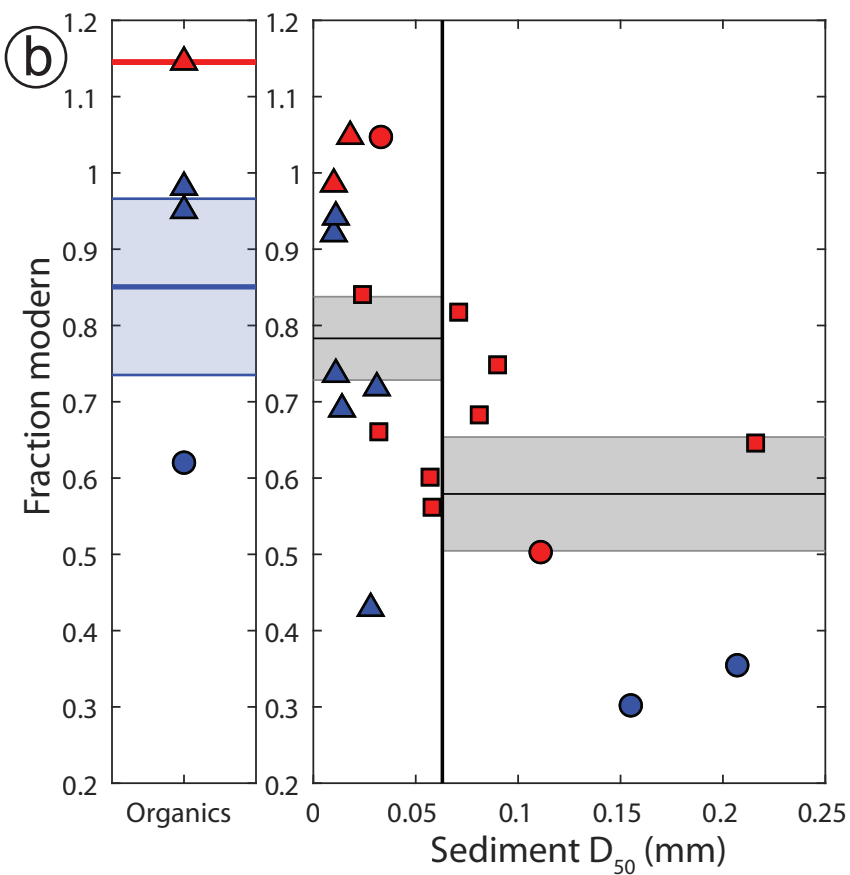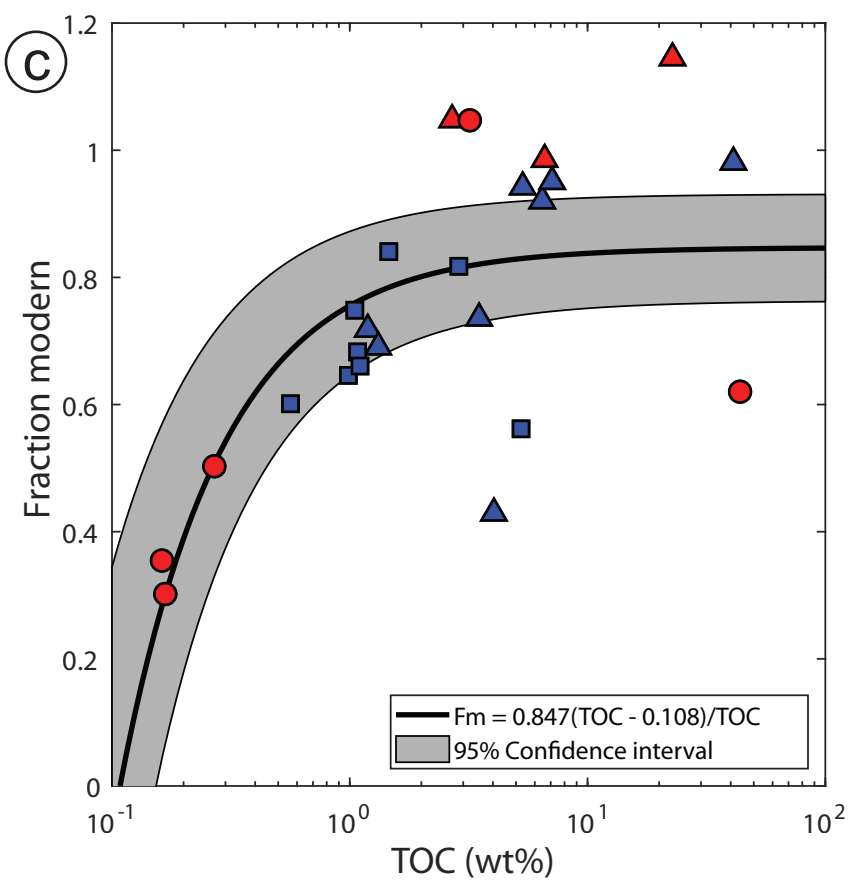

Supplement: Supplementary file 1 [file esurf-2021-80-supplement.zip › Fig4.pdf]

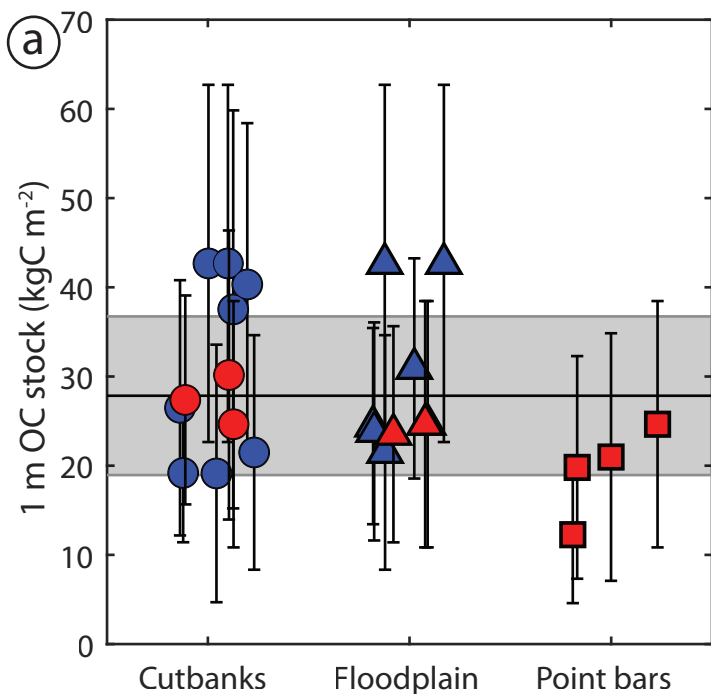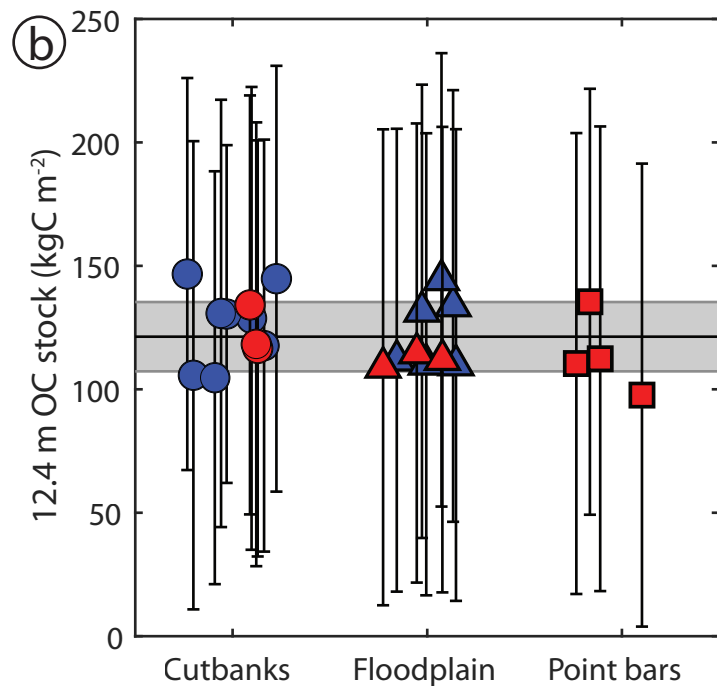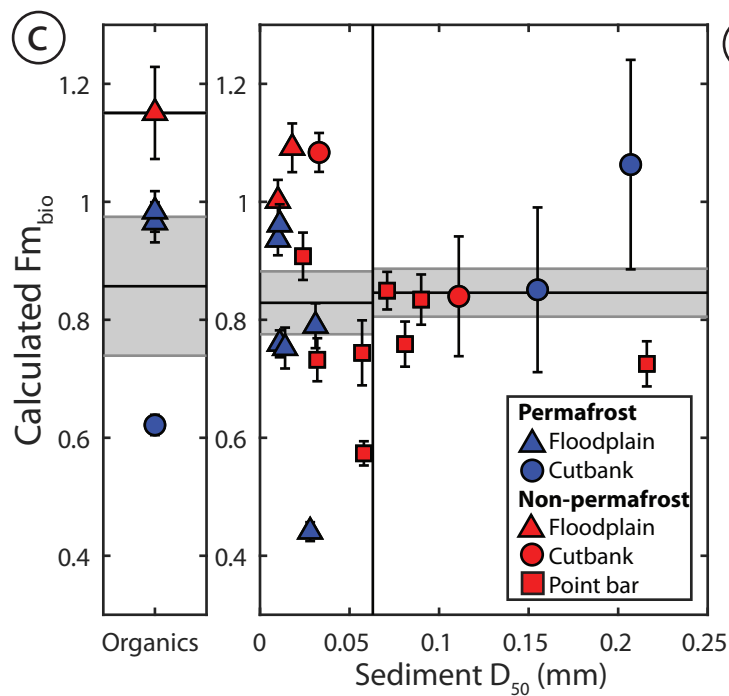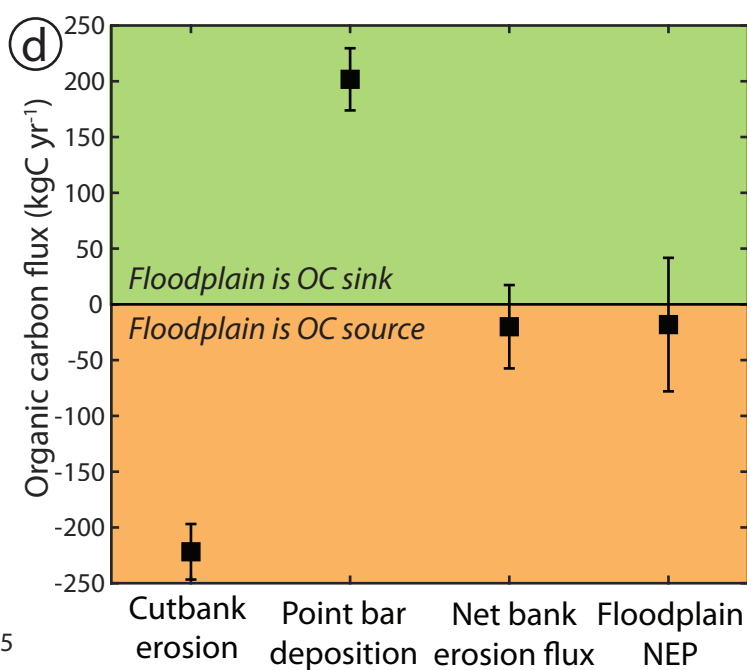

Supplement: Supplementary file 1 [file esurf-2021-80-supplement.zip › Fig5.pdf]

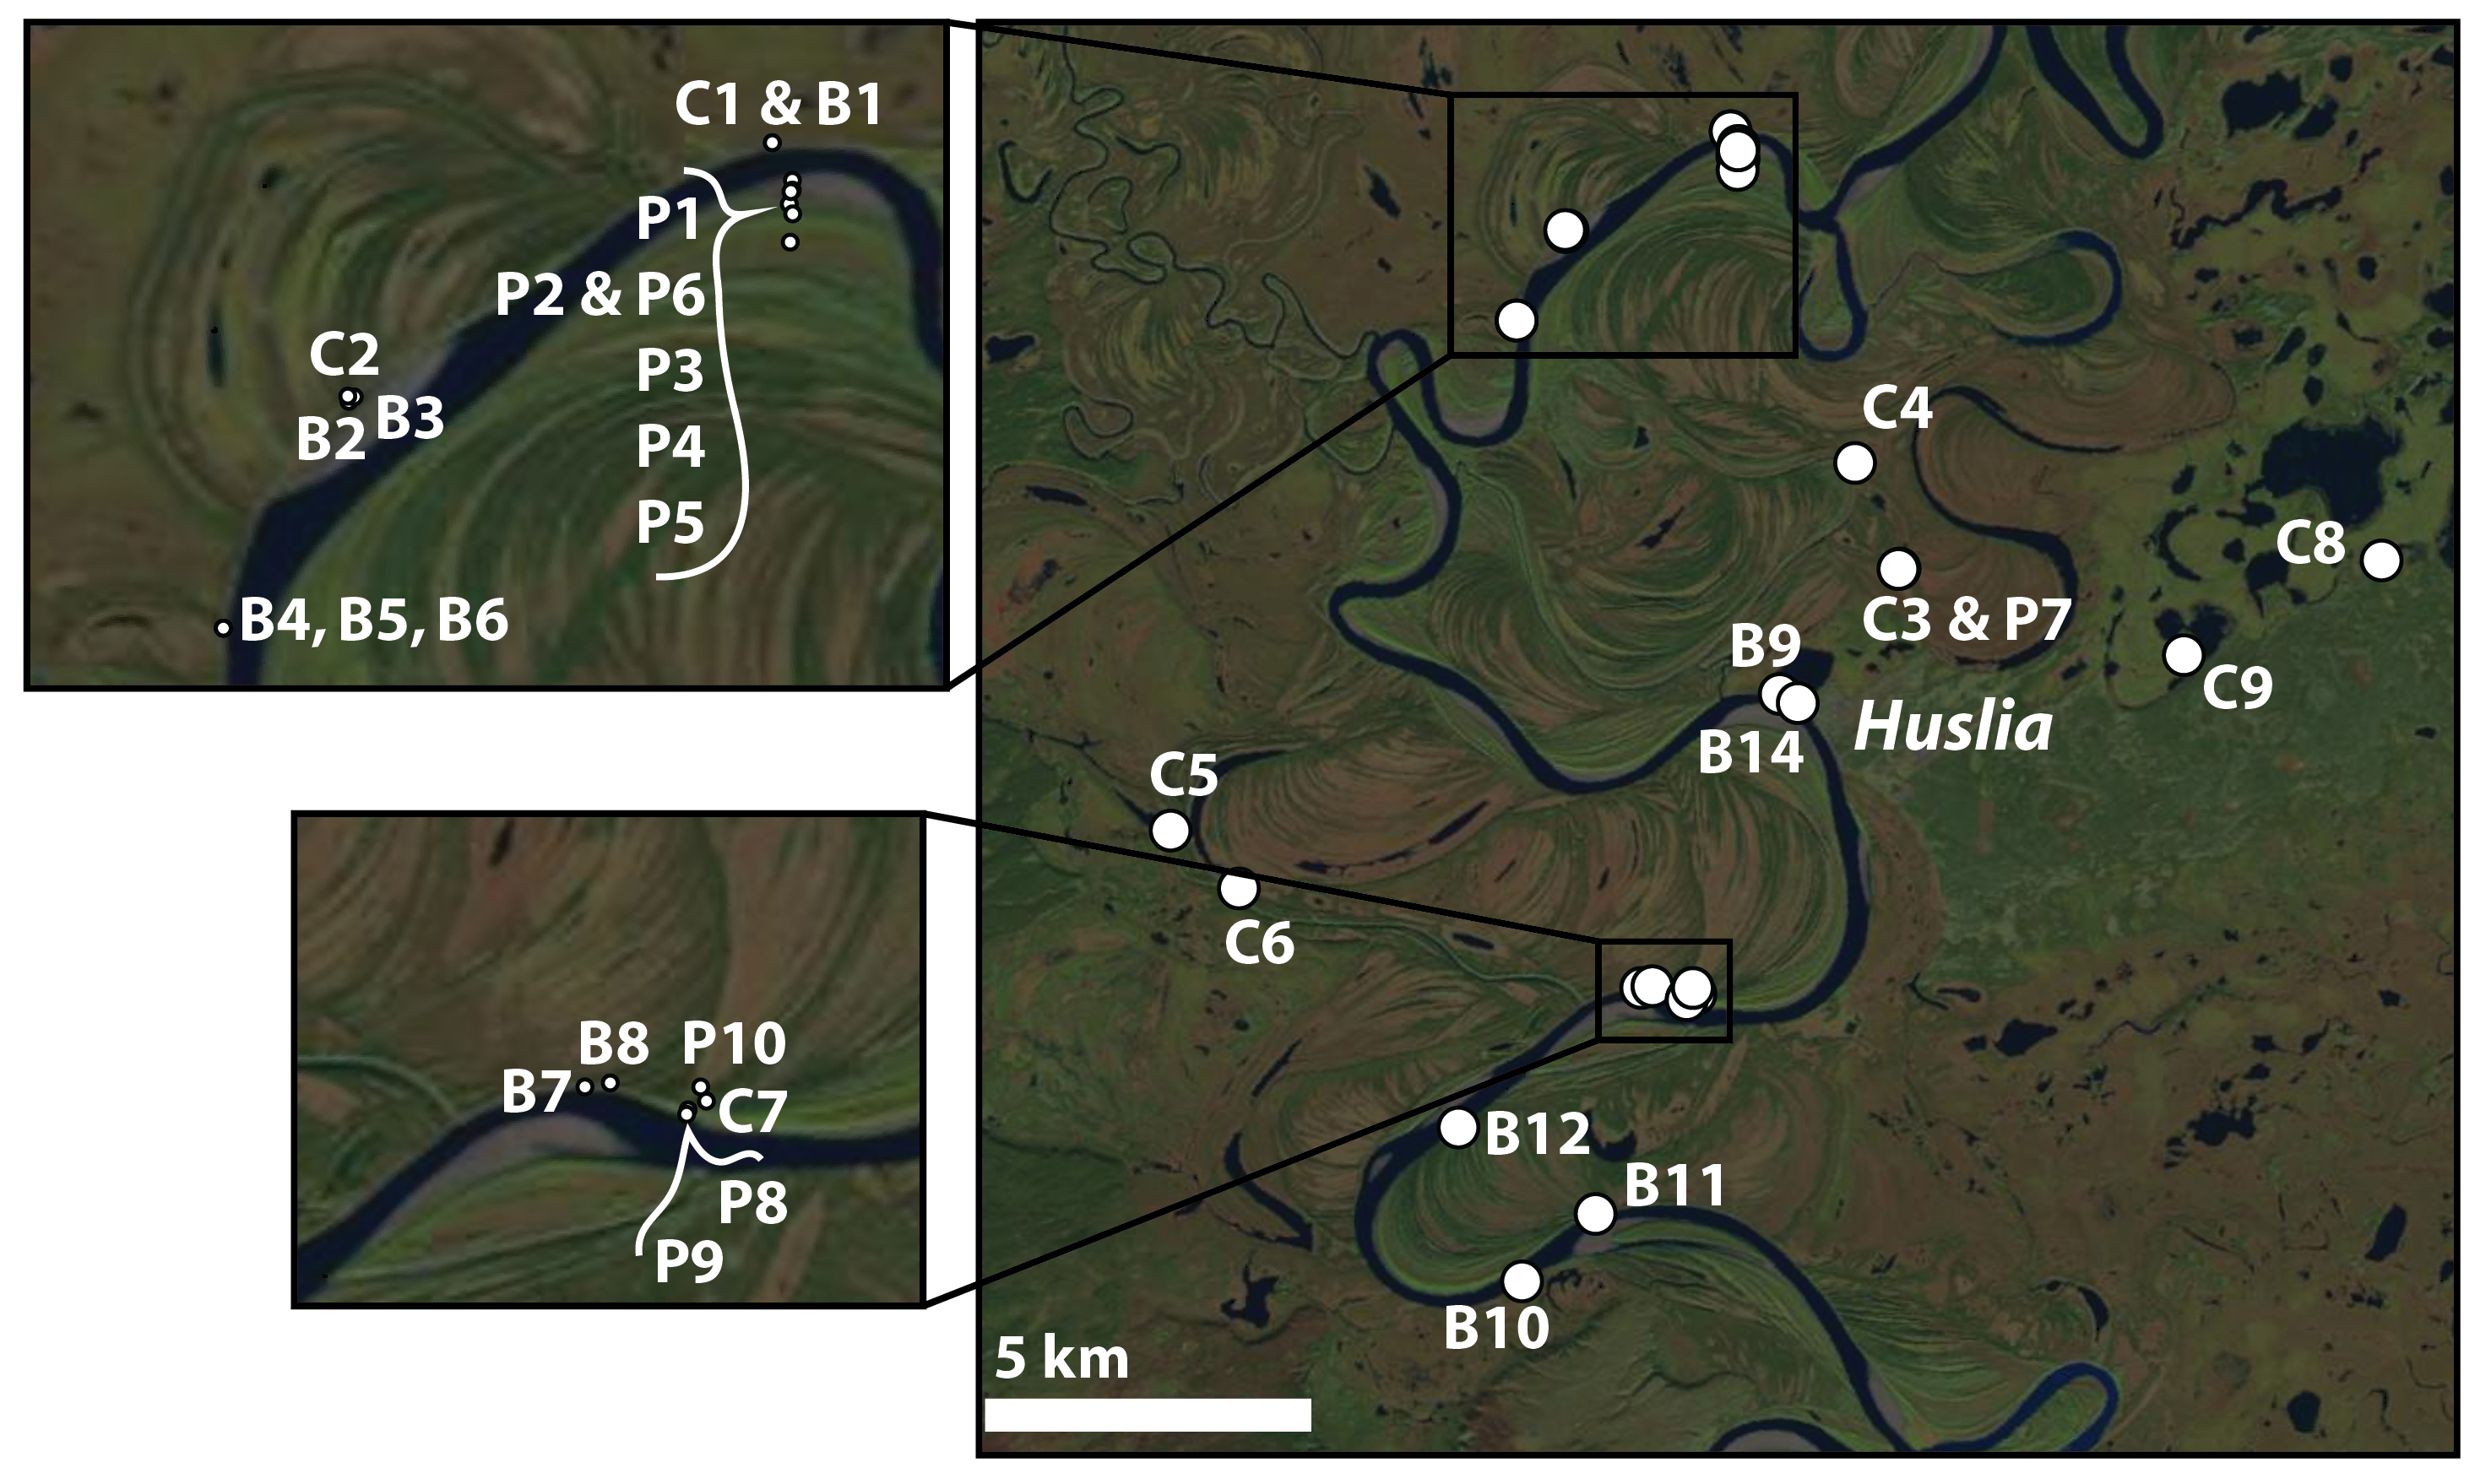

Supplement: Supplementary file 1 [file esurf-2021-80-supplement.zip › FigS1.png]

Koyukuk river reach width

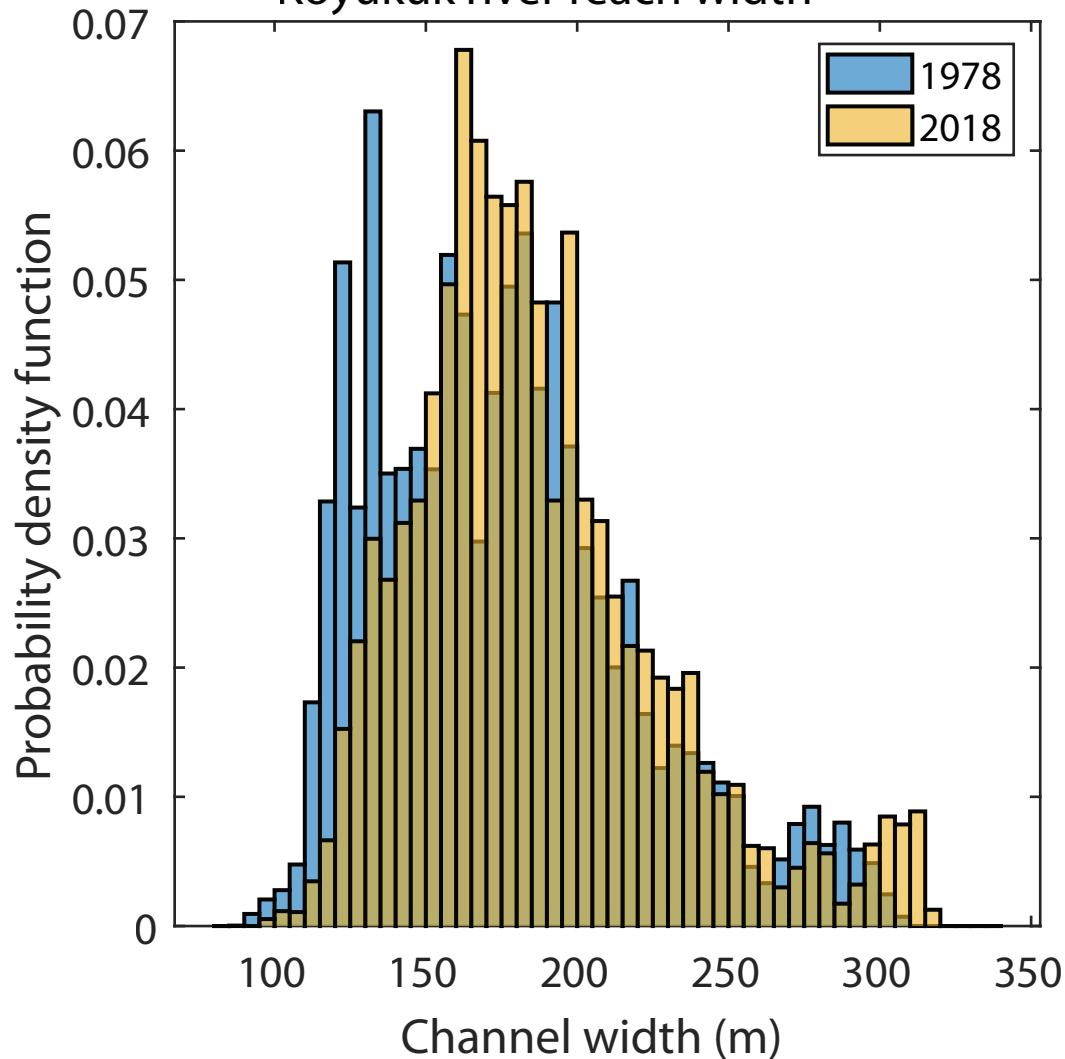

Supplement: Supplementary file 1 [file esurf-2021-80-supplement.zip › FigS2.pdf]

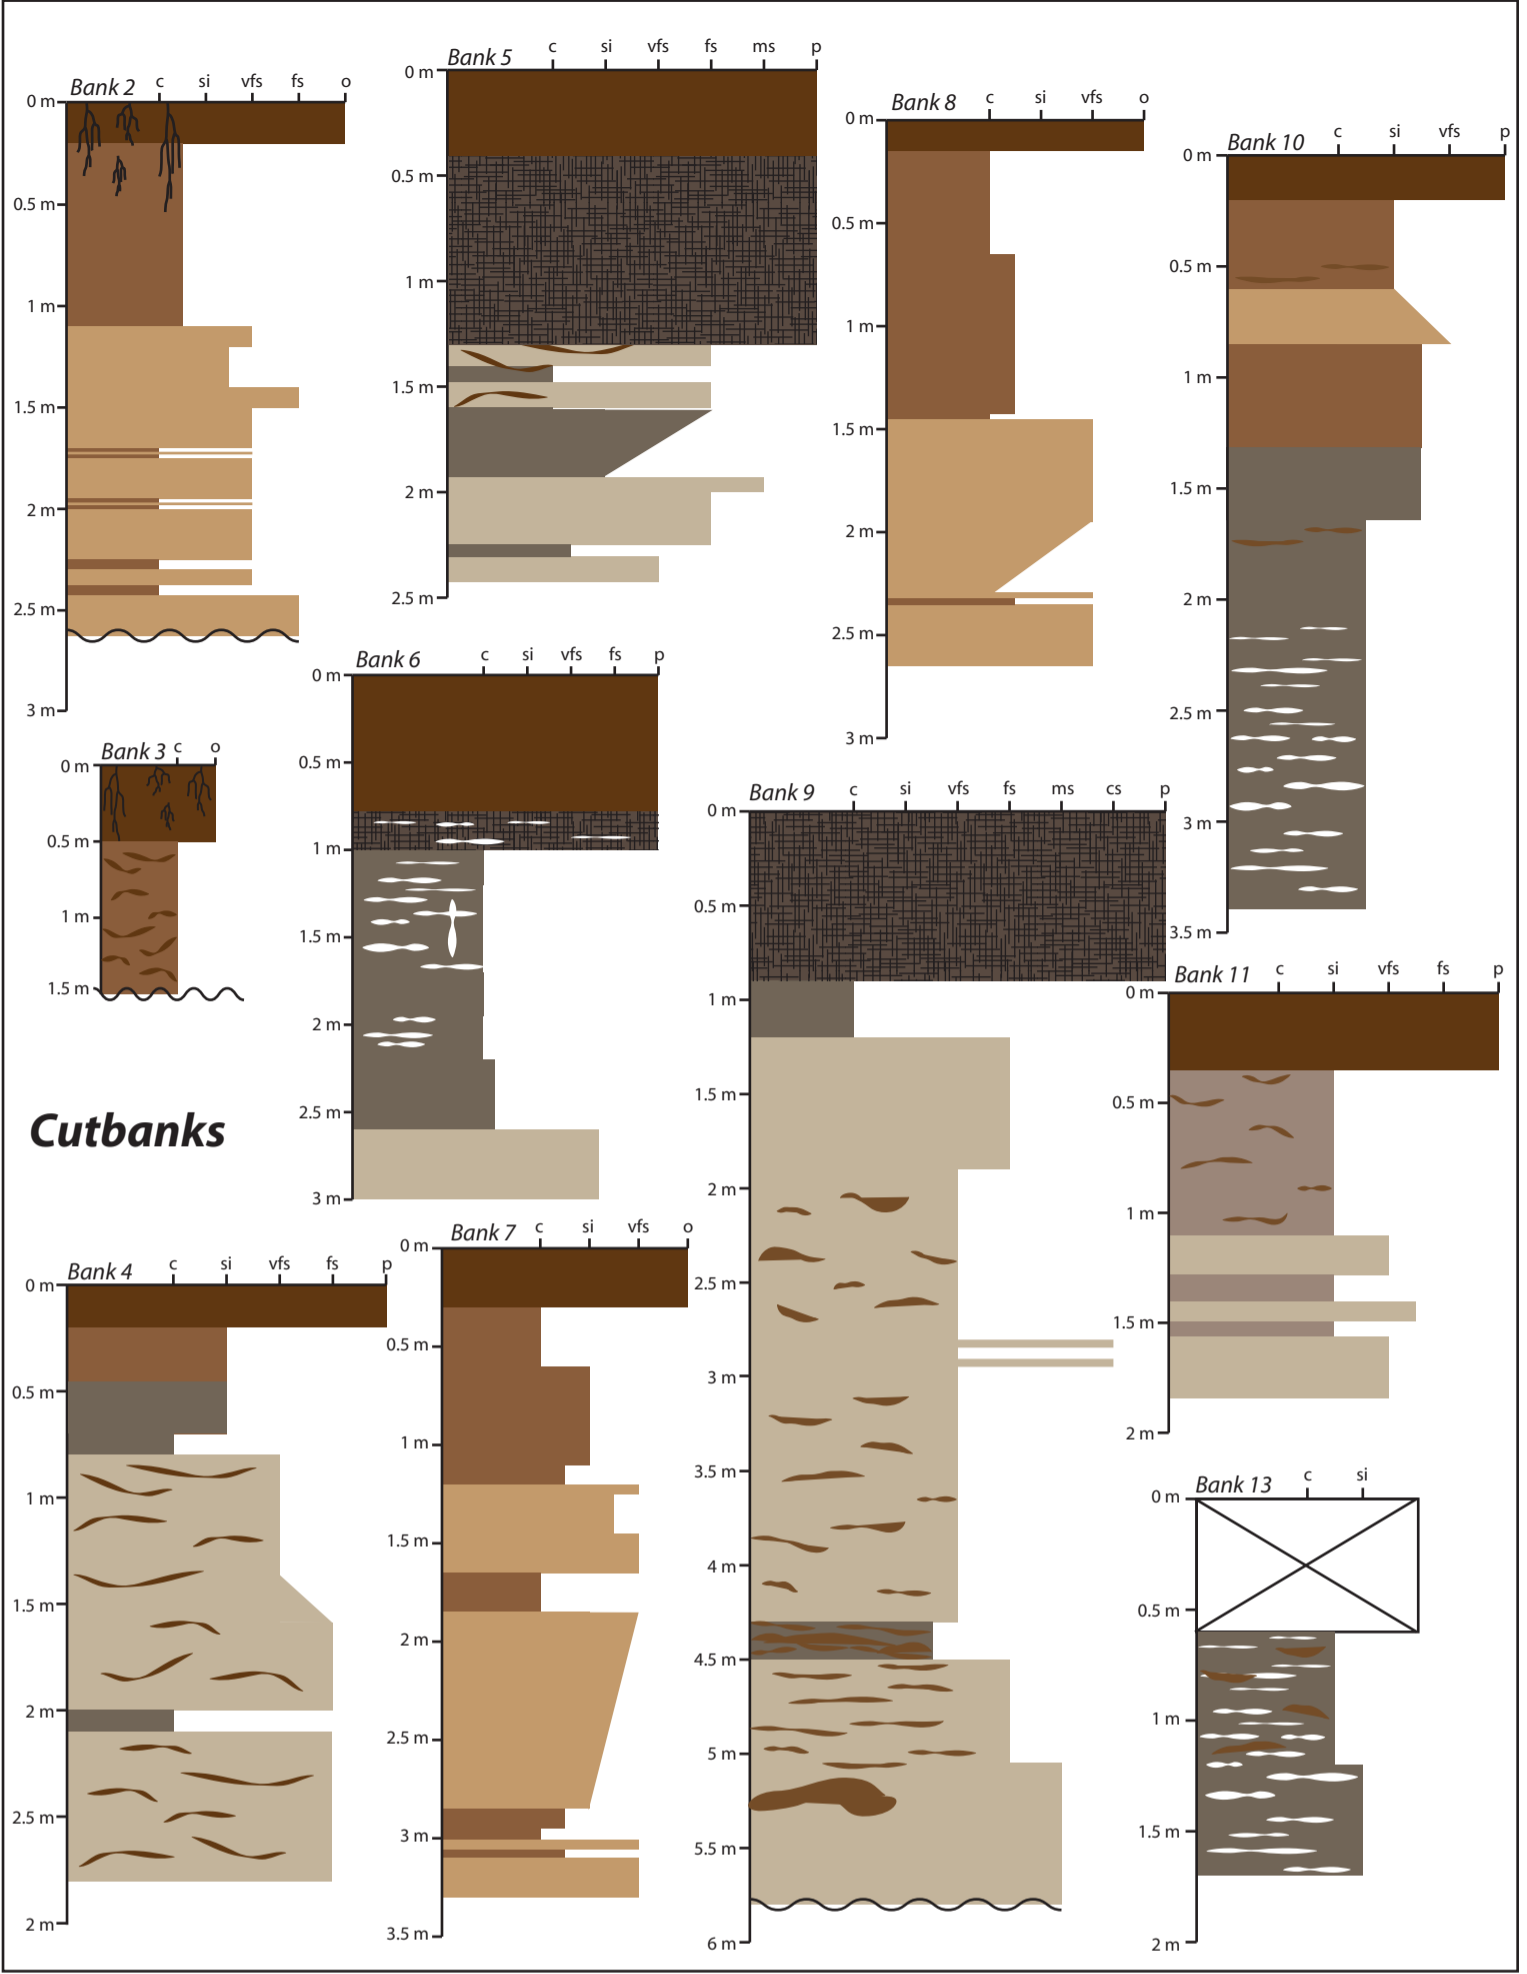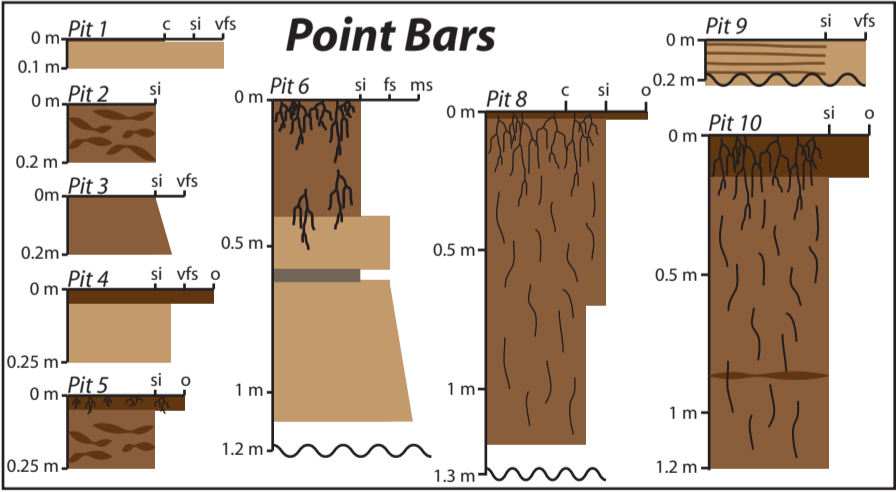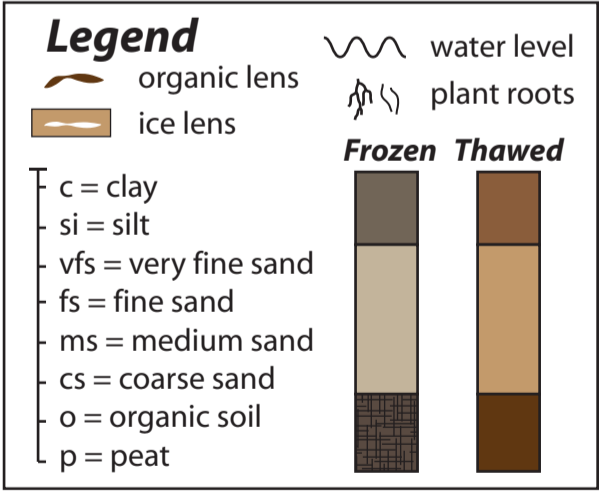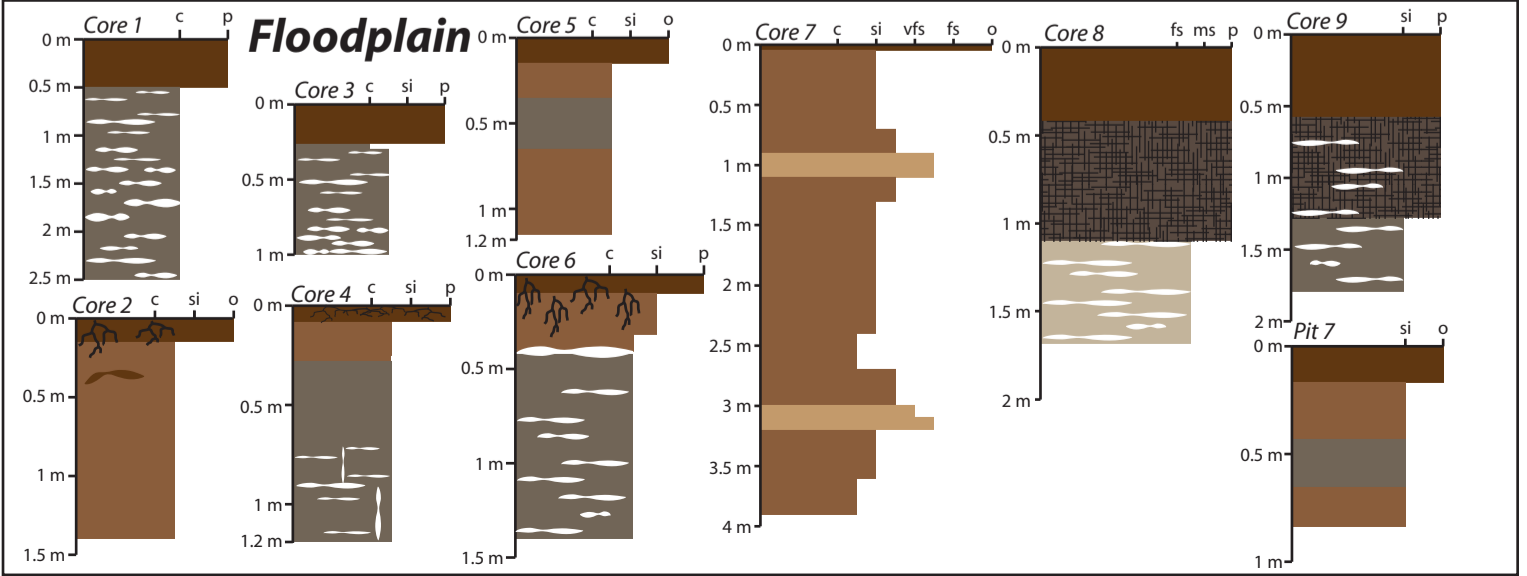

Supplement: Supplementary file 1 [file esurf-2021-80-supplement.zip › FigS3.pdf]

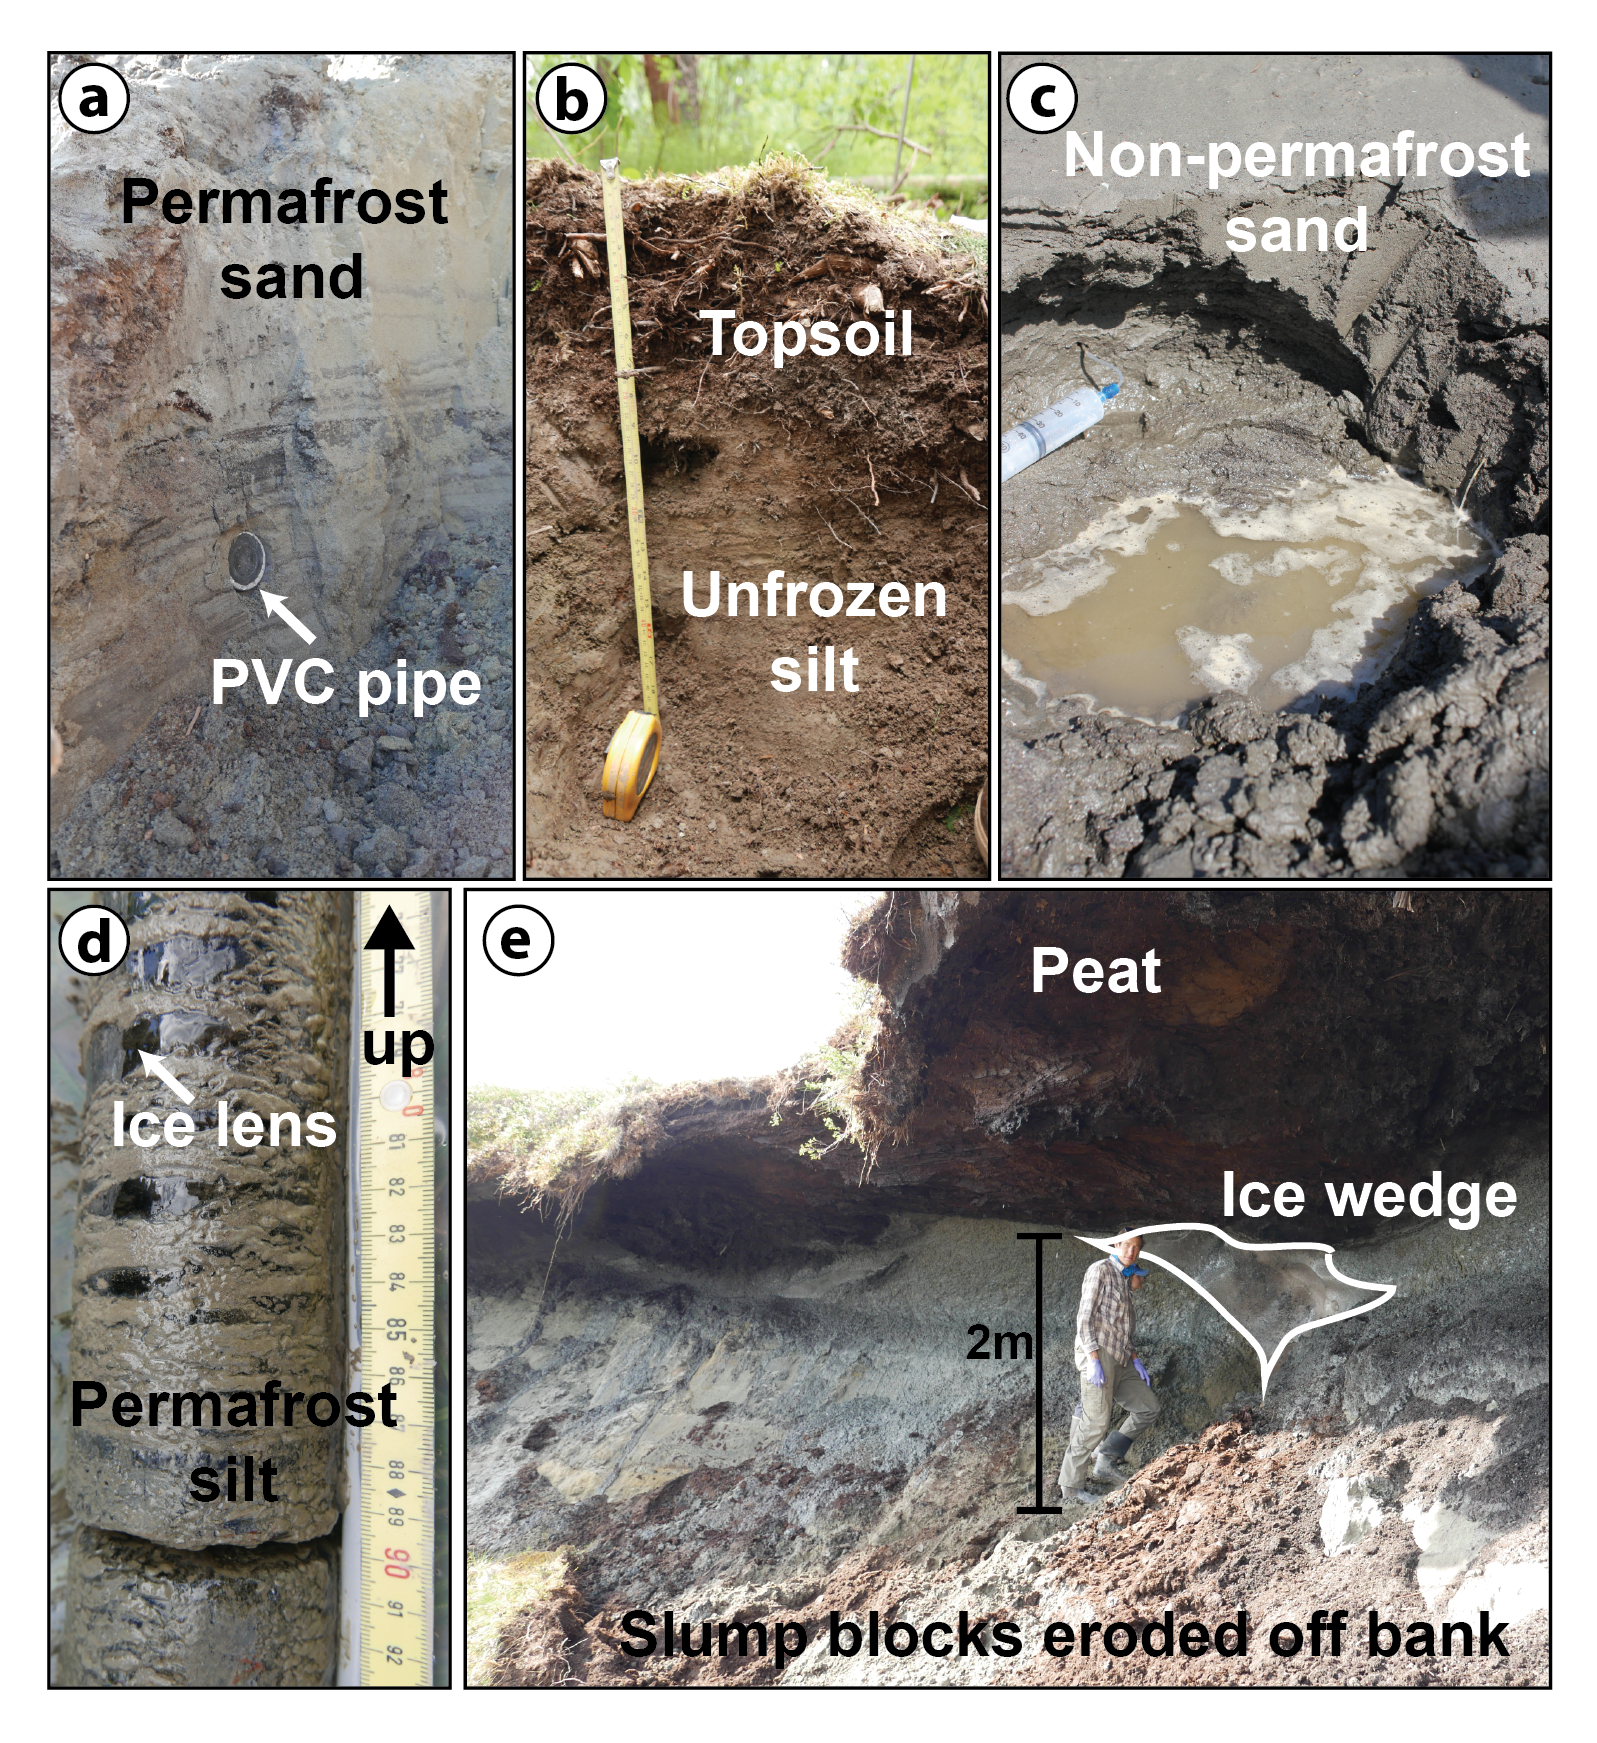

Supplement: Supplementary file 1 [file esurf-2021-80-supplement.zip › FigS4.png]

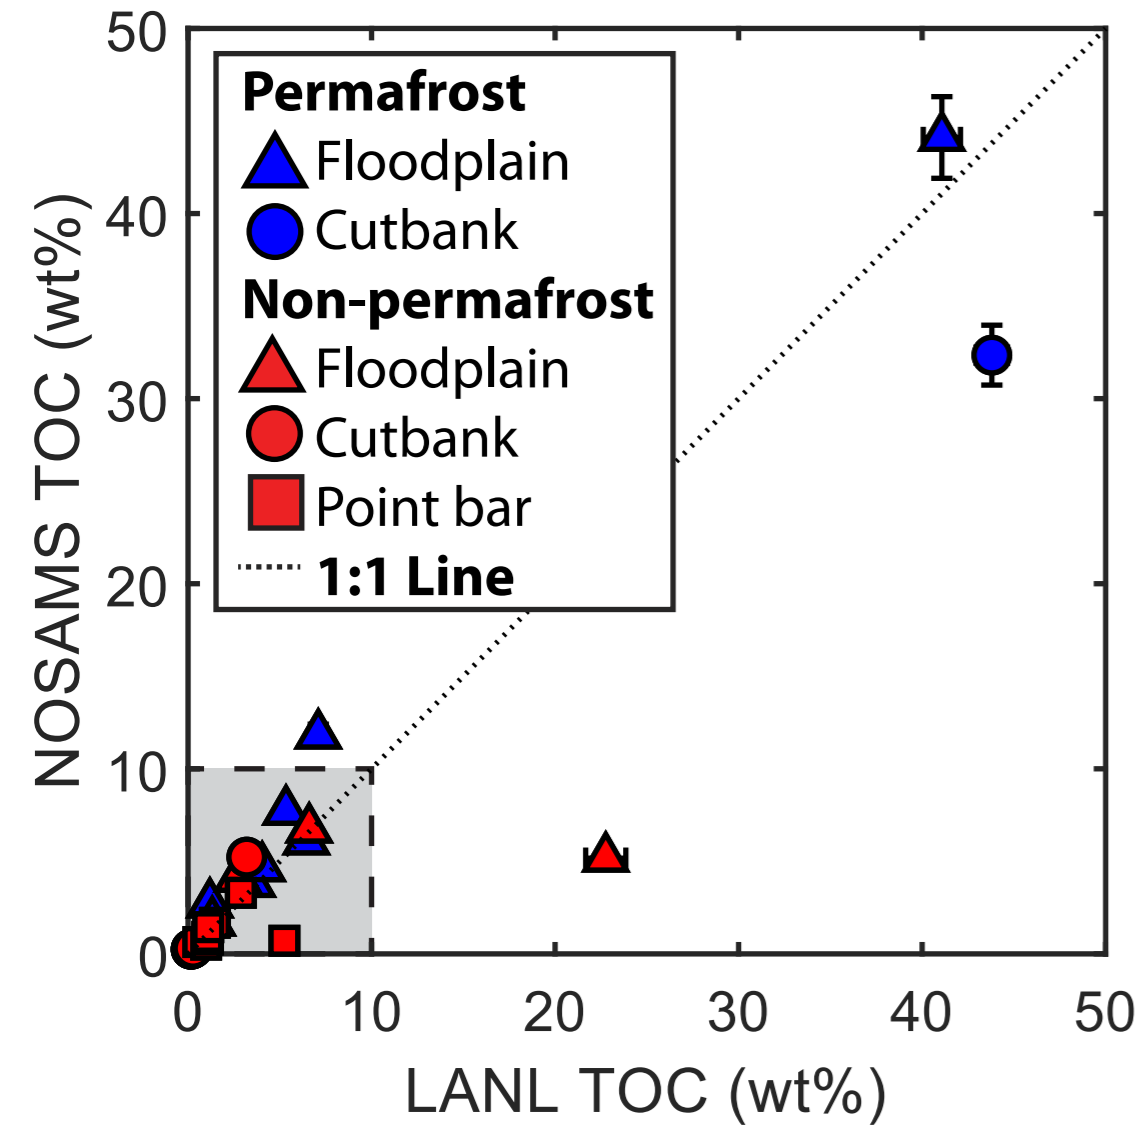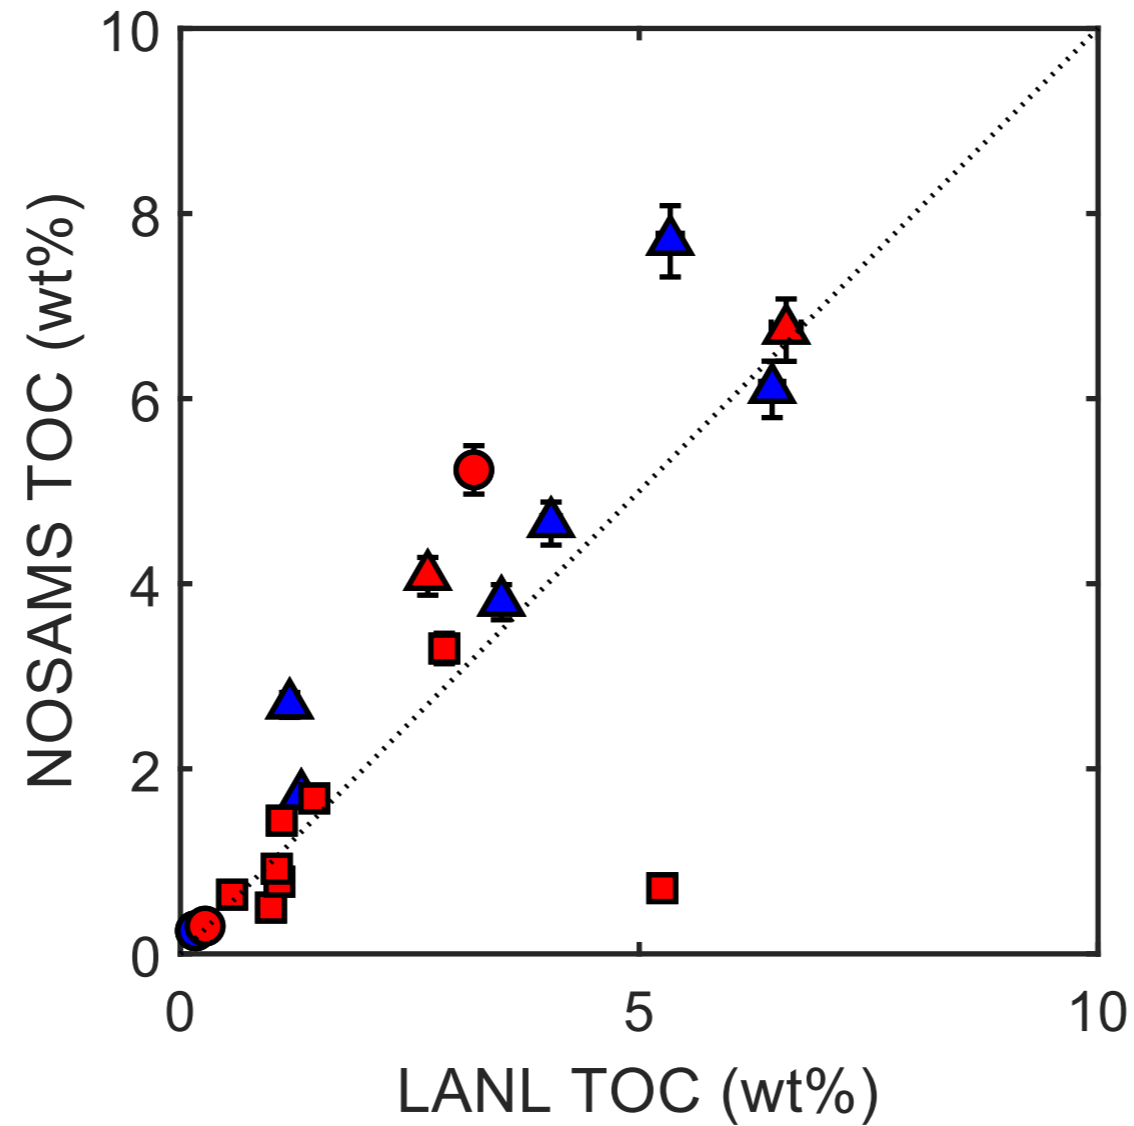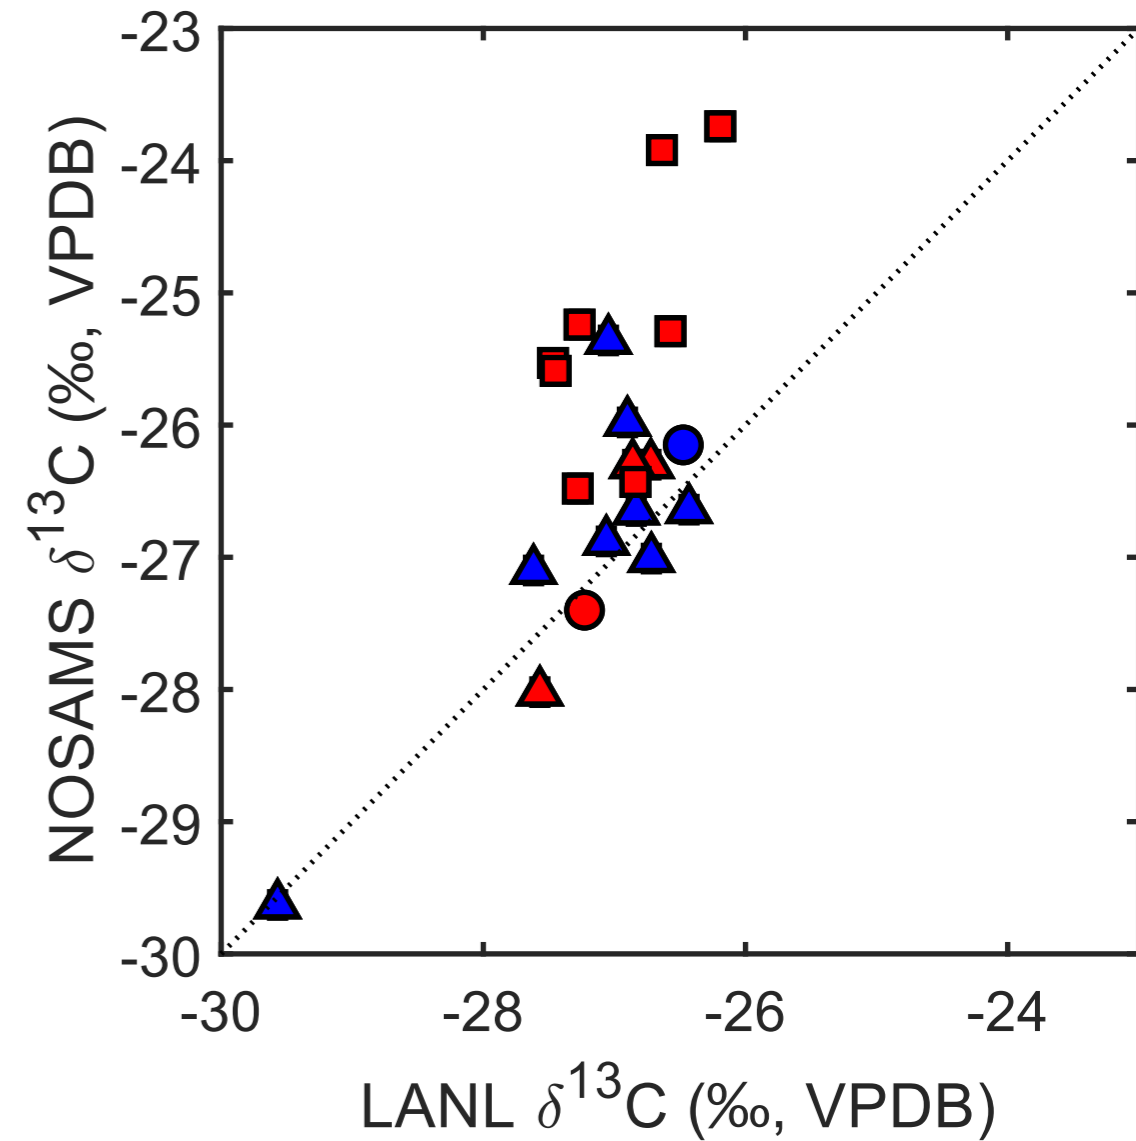

Supplement: Supplementary file 1 [file esurf-2021-80-supplement.zip › FigS5.pdf]

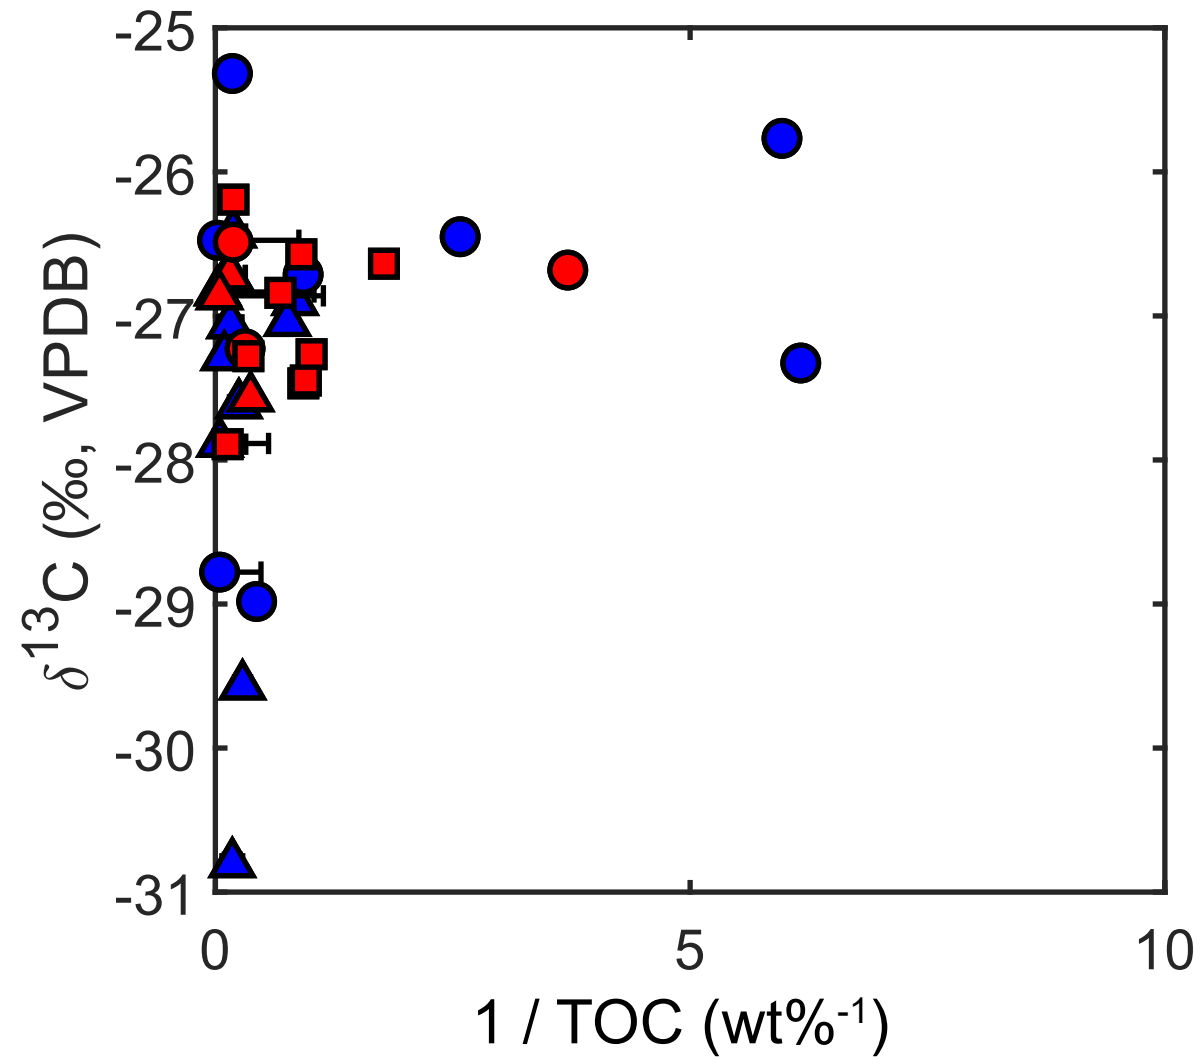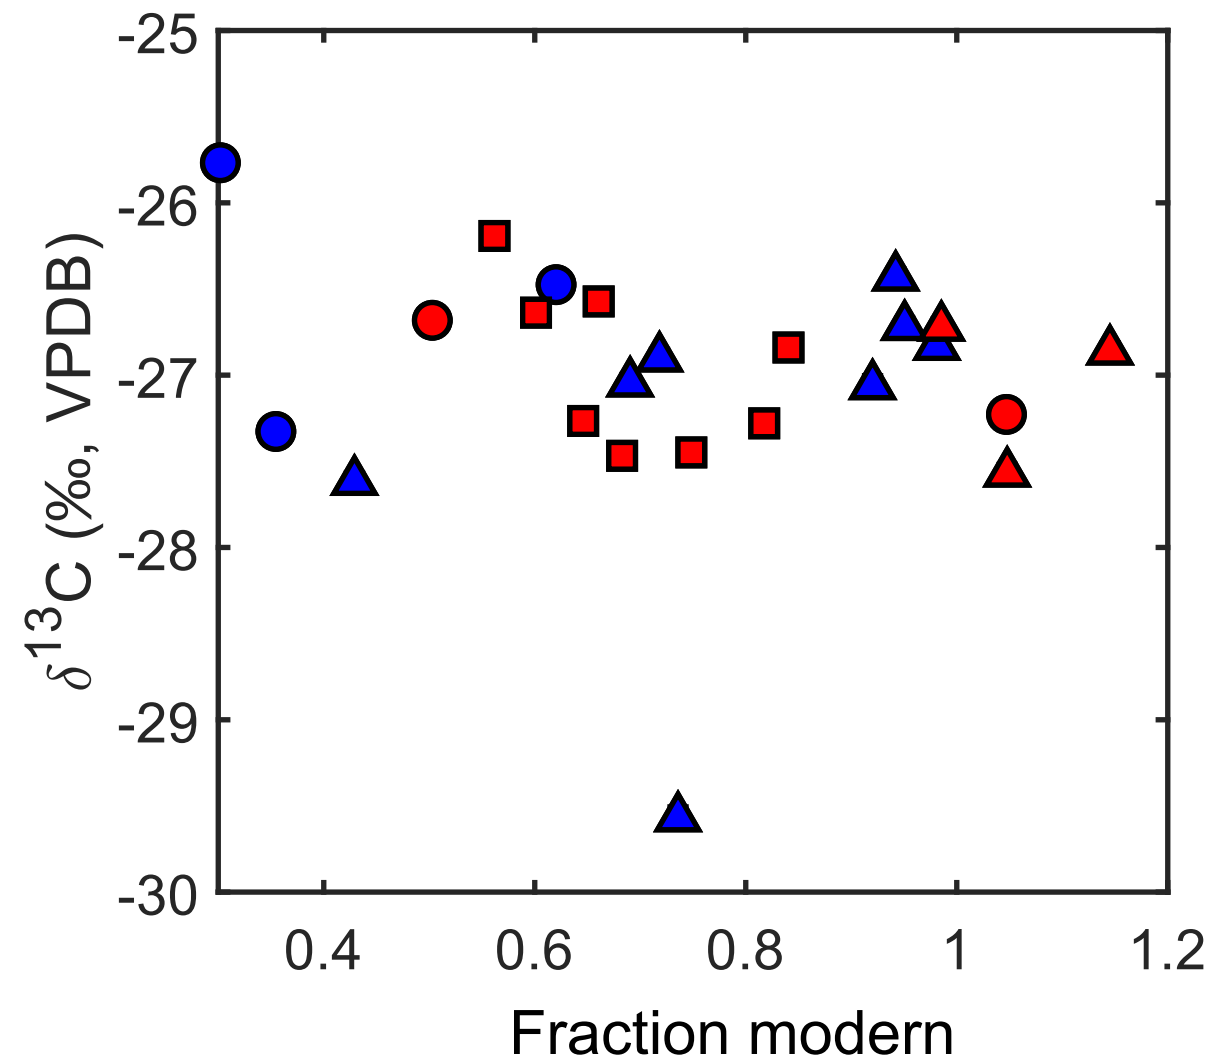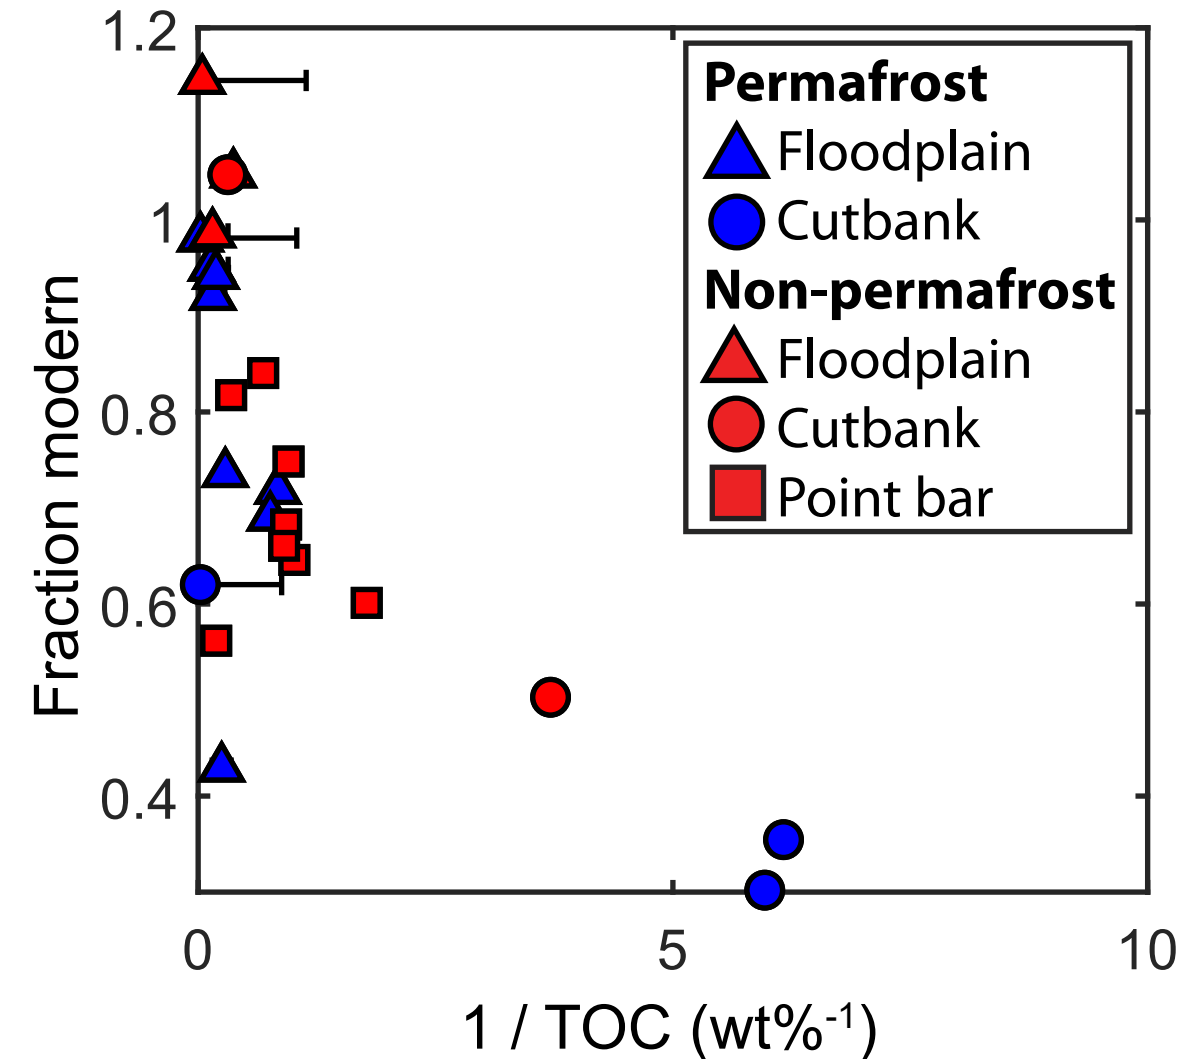

Supplement: Supplementary file 1 [file esurf-2021-80-supplement.zip › FigS6.pdf]

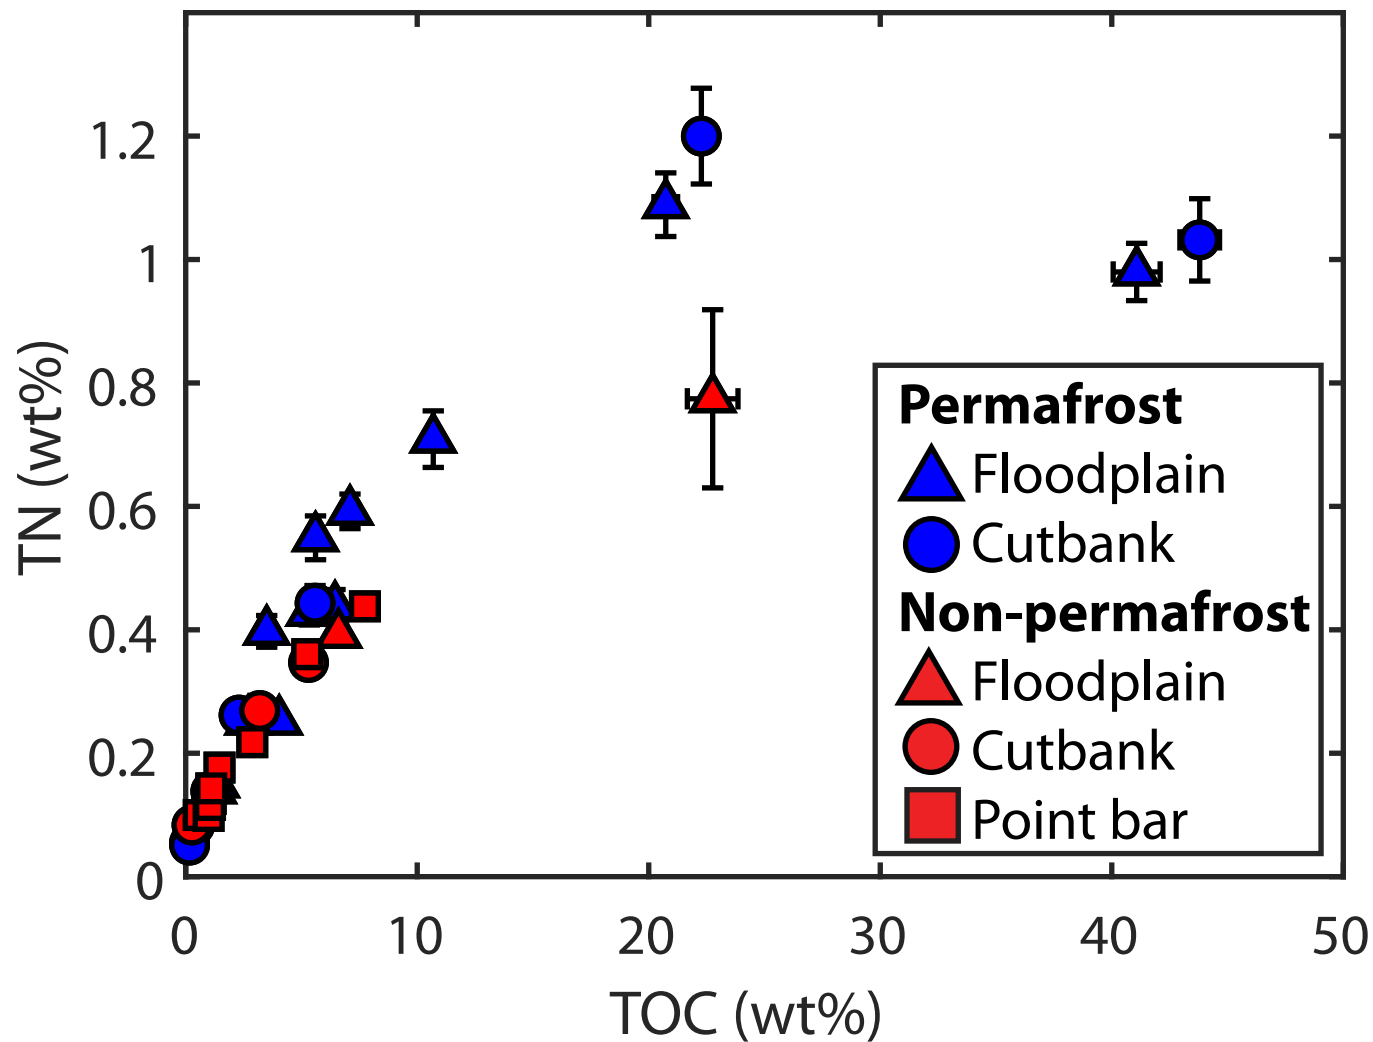

Supplement: Supplementary file 1 [file esurf-2021-80-supplement.zip › FigS7.pdf]
